# Supplementary material for: Design and In Silico and In Vitro Evaluations of a Novel Nicotinamide Derivative as a VEGFR-2 Inhibitor
Source: Hindawi journal article supplement (doi:10.1155/2024/2176512), 2024-03-01
Supplement: f1 [file 2176512.f1.pdf]

## Supplementary File

### Design, *in silico* and *in vitro* Evaluations of a Novel Nicotinamide Derivative as a VEGFR-2 inhibitor

Ibrahim H. Eissa<sup>a\*</sup>, Muhammad Abd ElGayed Bkrah<sup>a</sup>, Reda G. Yousef<sup>a</sup>, Hazem Elkady<sup>a</sup>, Eslam B. Elkaeed<sup>b\*</sup>, Bshra A. Alsfook<sup>c</sup>, Ibrahim M. Ibrahim<sup>d</sup>, Ahmed M. Metwaly<sup>e,f\*</sup>, Dalal Z. Husein<sup>g</sup>

<sup>a</sup> Pharmaceutical Medicinal Chemistry & Drug Design Department, Faculty of Pharmacy (Boys), Al-Azhar University, Cairo 11884, Egypt. [muhammad.bkrah@azhar.edu.eg](mailto:muhammad.bkrah@azhar.edu.eg); [redayousof@azhar.edu.eg](mailto:redayousof@azhar.edu.eg) [Hazemelkady@azhar.edu.eg](mailto:Hazemelkady@azhar.edu.eg)

<sup>b</sup> Department of Pharmaceutical Sciences, College of Pharmacy, AlMaarefa University, Riyadh 13713, Saudi Arabia. [ekaheed@um.edu.sa](mailto:ekaheed@um.edu.sa)

<sup>c</sup> Department of Pharmaceutical Sciences, College of Pharmacy, Princess Nourah bint Abdulrahman University, P.O. Box 84428, Riyadh 11671, Saudi Arabia [baalsfook@pnu.edu.sa](mailto:baalsfook@pnu.edu.sa);

<sup>d</sup> Biophysics Department, Faculty of Science, Cairo University. Giza 12613, Egypt. [ibrahim\\_mohamed@cu.edu.eg](mailto:ibrahim_mohamed@cu.edu.eg)

<sup>e</sup> Pharmacognosy and Medicinal Plants Department, Faculty of Pharmacy (Boys), Al-Azhar University, Cairo 11884, Egypt.

<sup>f</sup> Biopharmaceutical Products Research Department, Genetic Engineering and Biotechnology Research Institute, City of Scientific Research and Technological Applications (SRTA-City), Alexandria, Egypt.

<sup>g</sup> Chemistry Department, Faculty of Science, New Valley University, El-Kharja 72511, Egypt. [dalal\\_husein@sci.nvu.edu.eg](mailto:dalal_husein@sci.nvu.edu.eg)

### Content

|                                                                                                                                                |                                             |
|------------------------------------------------------------------------------------------------------------------------------------------------|---------------------------------------------|
| <b>Fig. S.1.</b> Change in the eigenvalues with increasing the eigenvectors (blue). The cumulative variance retained in the eigenvectors (red) |                                             |
| <b>Fig.S.2.</b> 1 <sup>st</sup> ten eigenvectors' distribution.                                                                                |                                             |
| <b>Fig. S.3.</b> Cosine content of the 1 <sup>st</sup> ten eigenvectors for the two trajectories.                                              |                                             |
| <b>Method</b>                                                                                                                                  | <b>Molecular Docking</b>                    |
|                                                                                                                                                | <b>MD Simulations</b>                       |
|                                                                                                                                                | <b>MM-GBSA</b>                              |
|                                                                                                                                                | <b>DFT</b>                                  |
|                                                                                                                                                | <b>Essential dynamics</b>                   |
|                                                                                                                                                | <b>ADMET studies</b>                        |
|                                                                                                                                                | <b>Synthesis</b>                            |
|                                                                                                                                                | <b><i>In vitro</i> assays</b>               |
| <b>Spectral Data</b>                                                                                                                           | <b>IR and Ms</b>                            |
|                                                                                                                                                | <b><sup>1</sup>H and <sup>13</sup>C NMR</b> |
| <b>Toxicity report</b>                                                                                                                         |                                             |

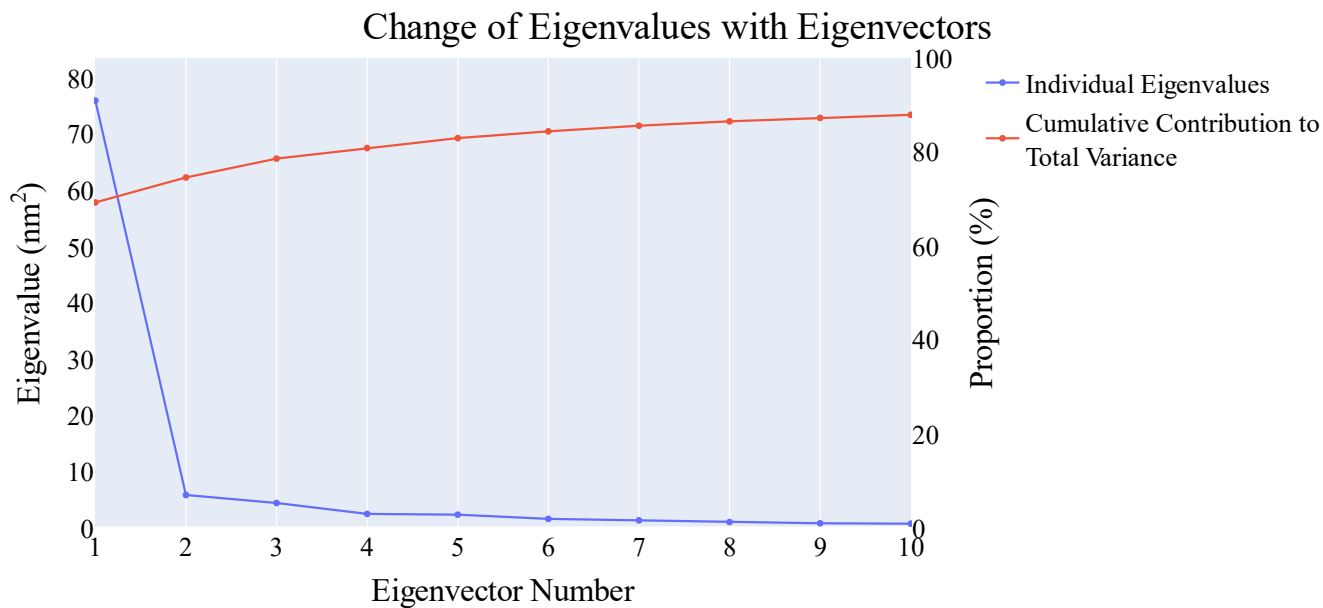

**Fig. S.1.** Change in the eigenvalues with increasing the eigenvectors (blue). The cumulative variance retained in the eigenvectors (red)

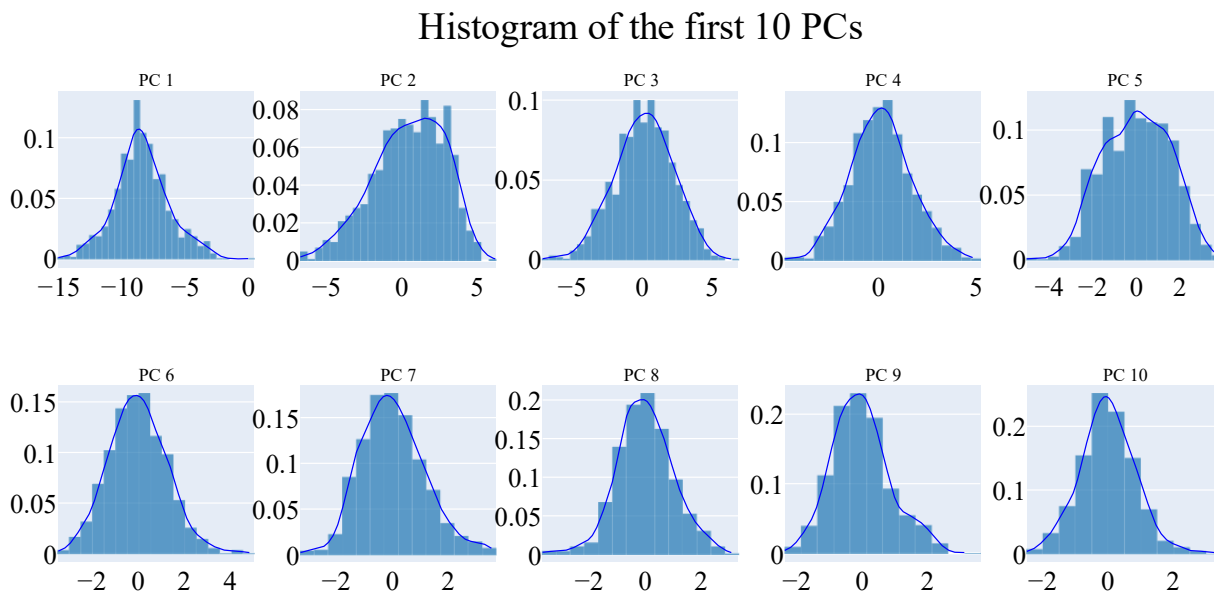

**Fig.S.2.** 1<sup>st</sup> ten eigenvectors' distribution.

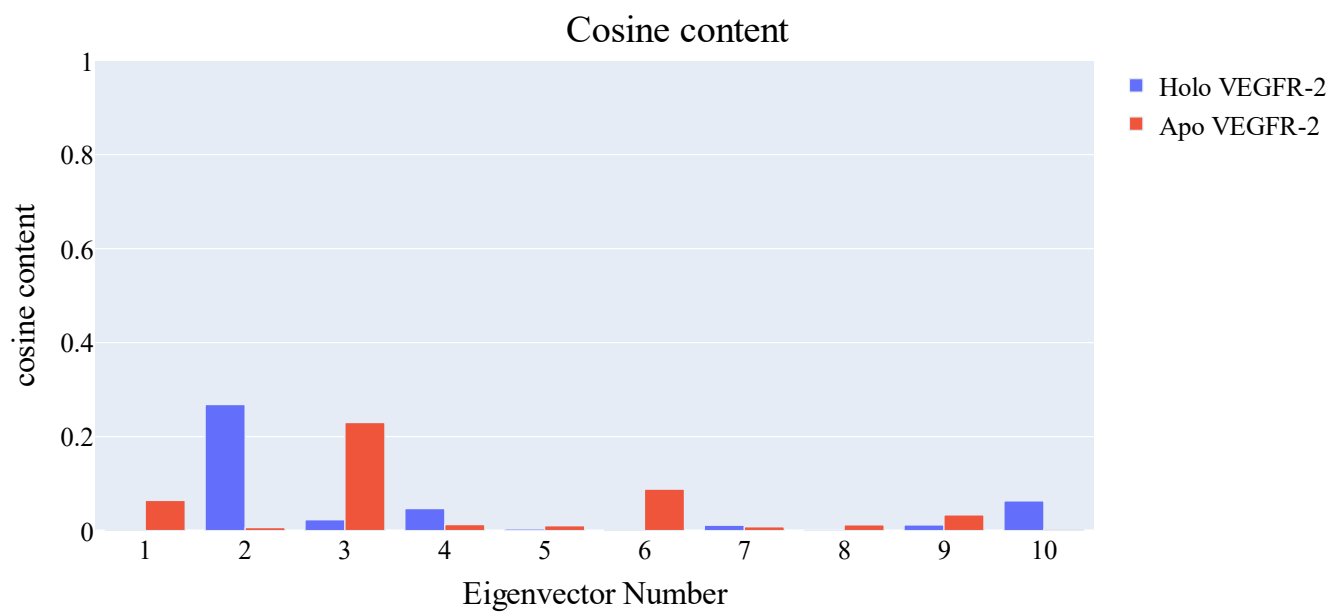

**Fig. S.3.** Cosine content of the 1<sup>st</sup> ten eigenvectors for the two trajectories.

# Spectral data

1H NMR of 4

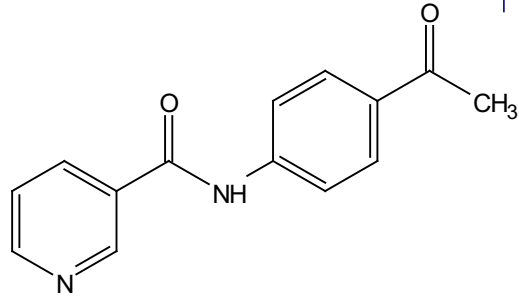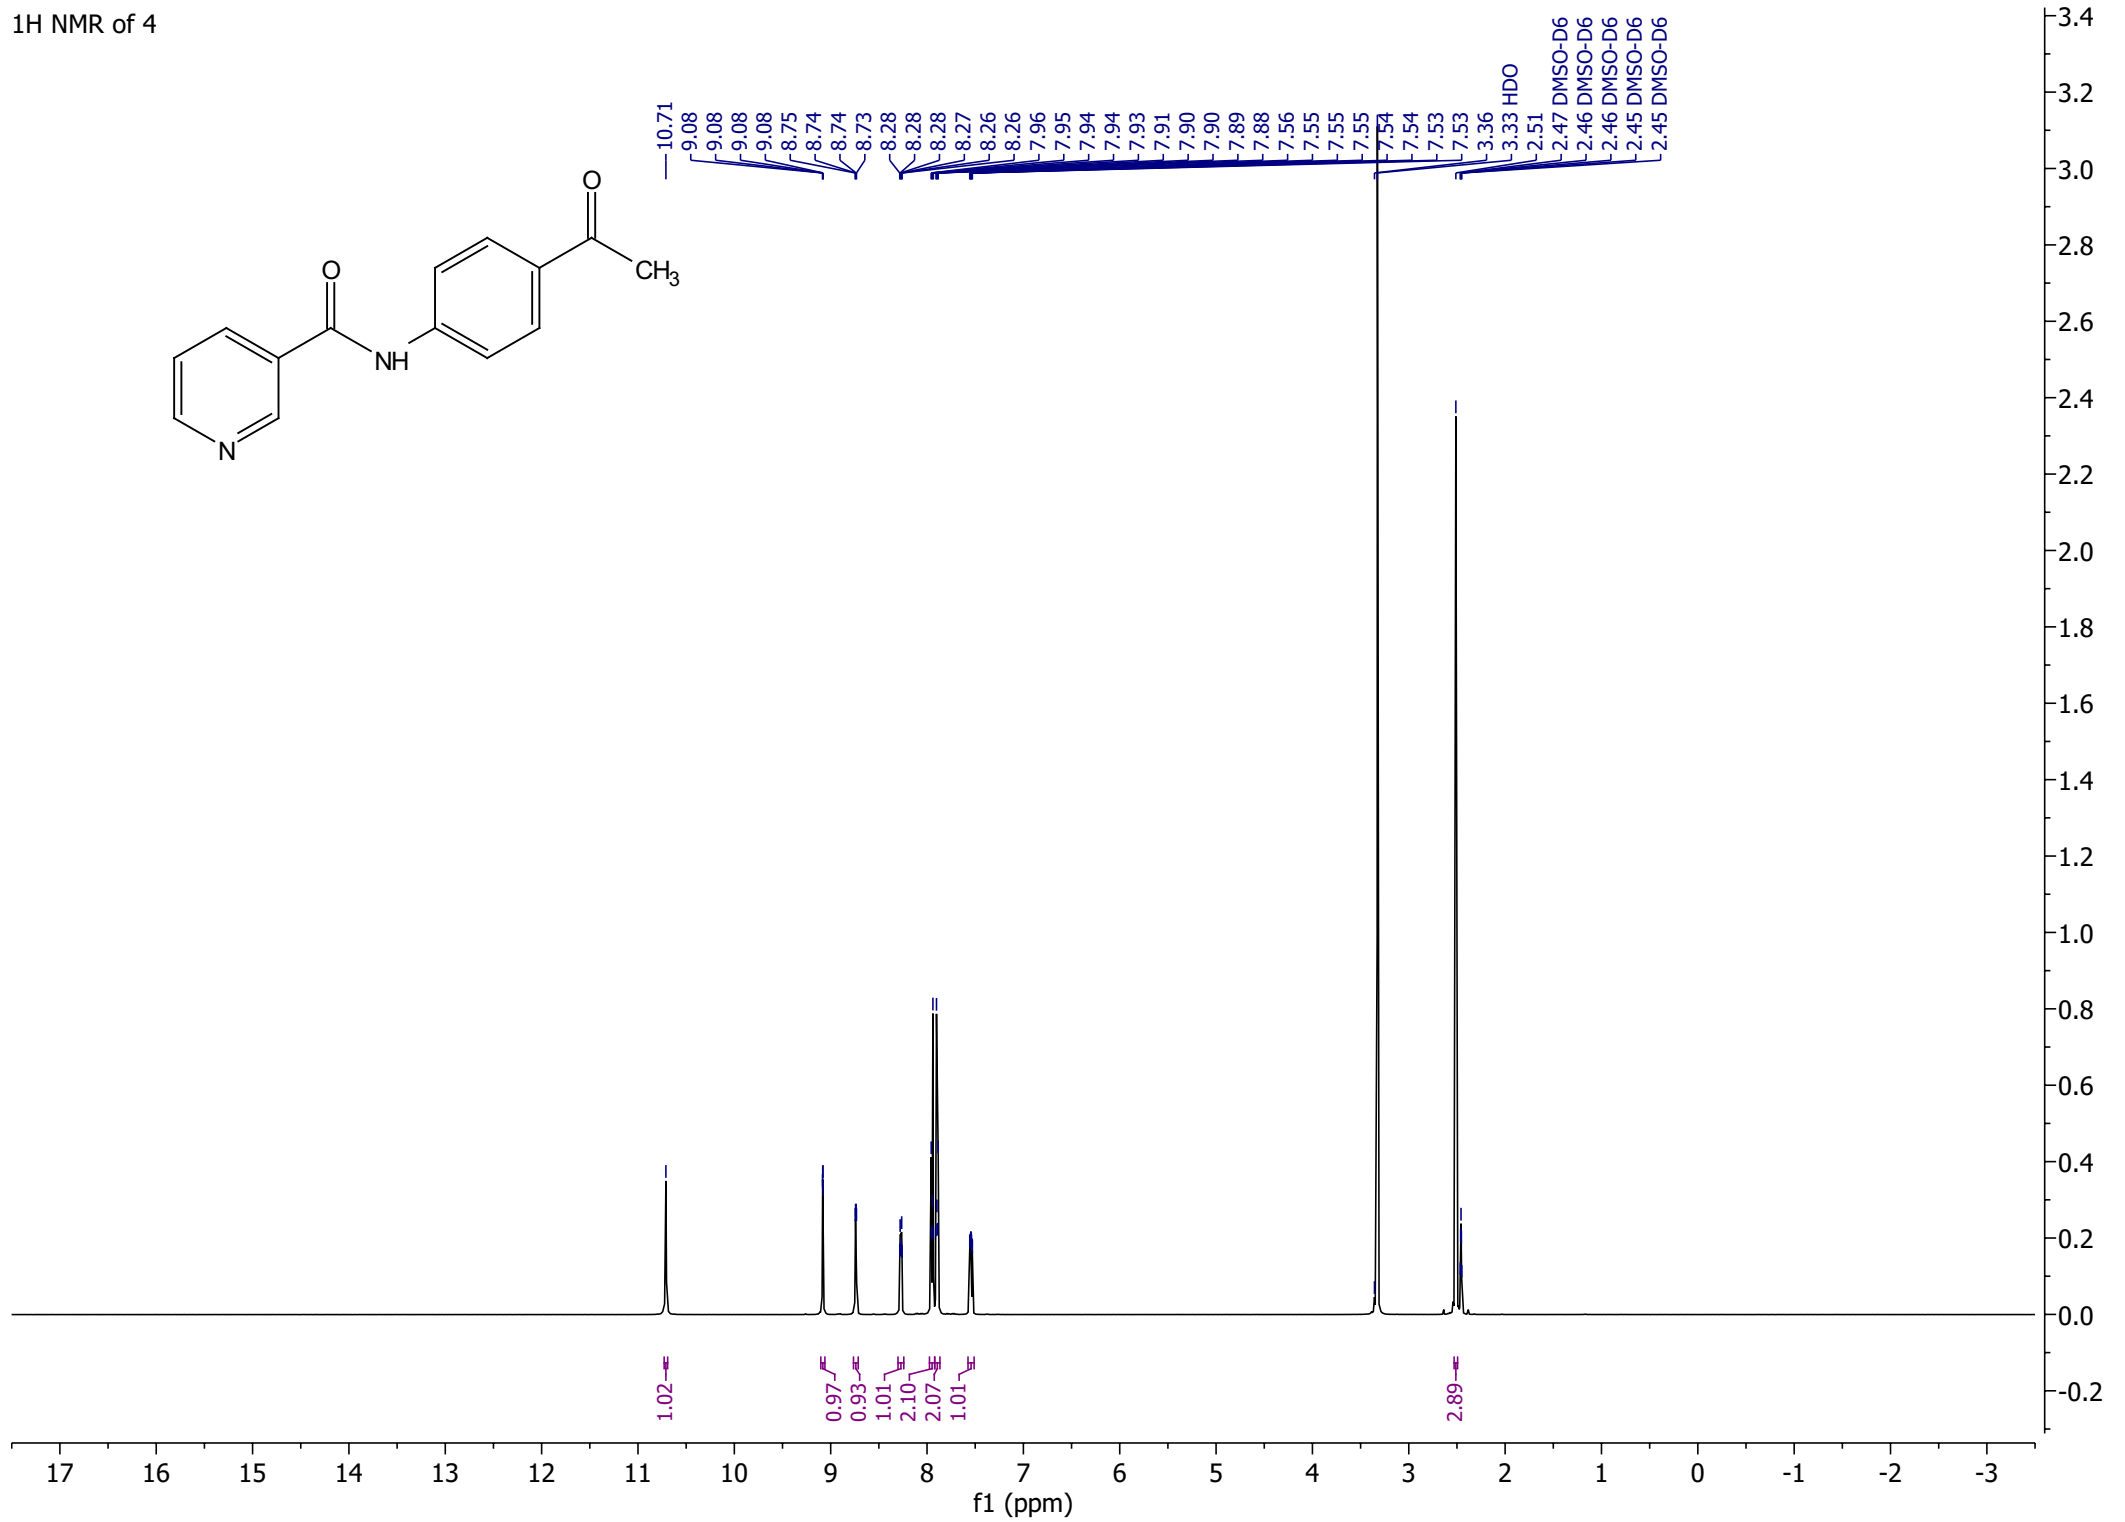

1H NMR of 4

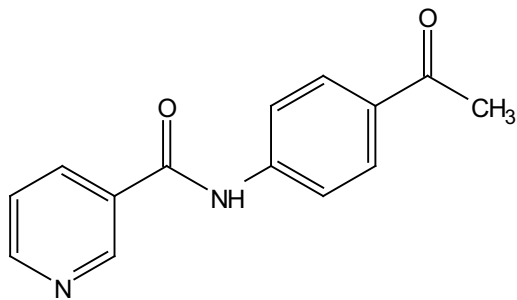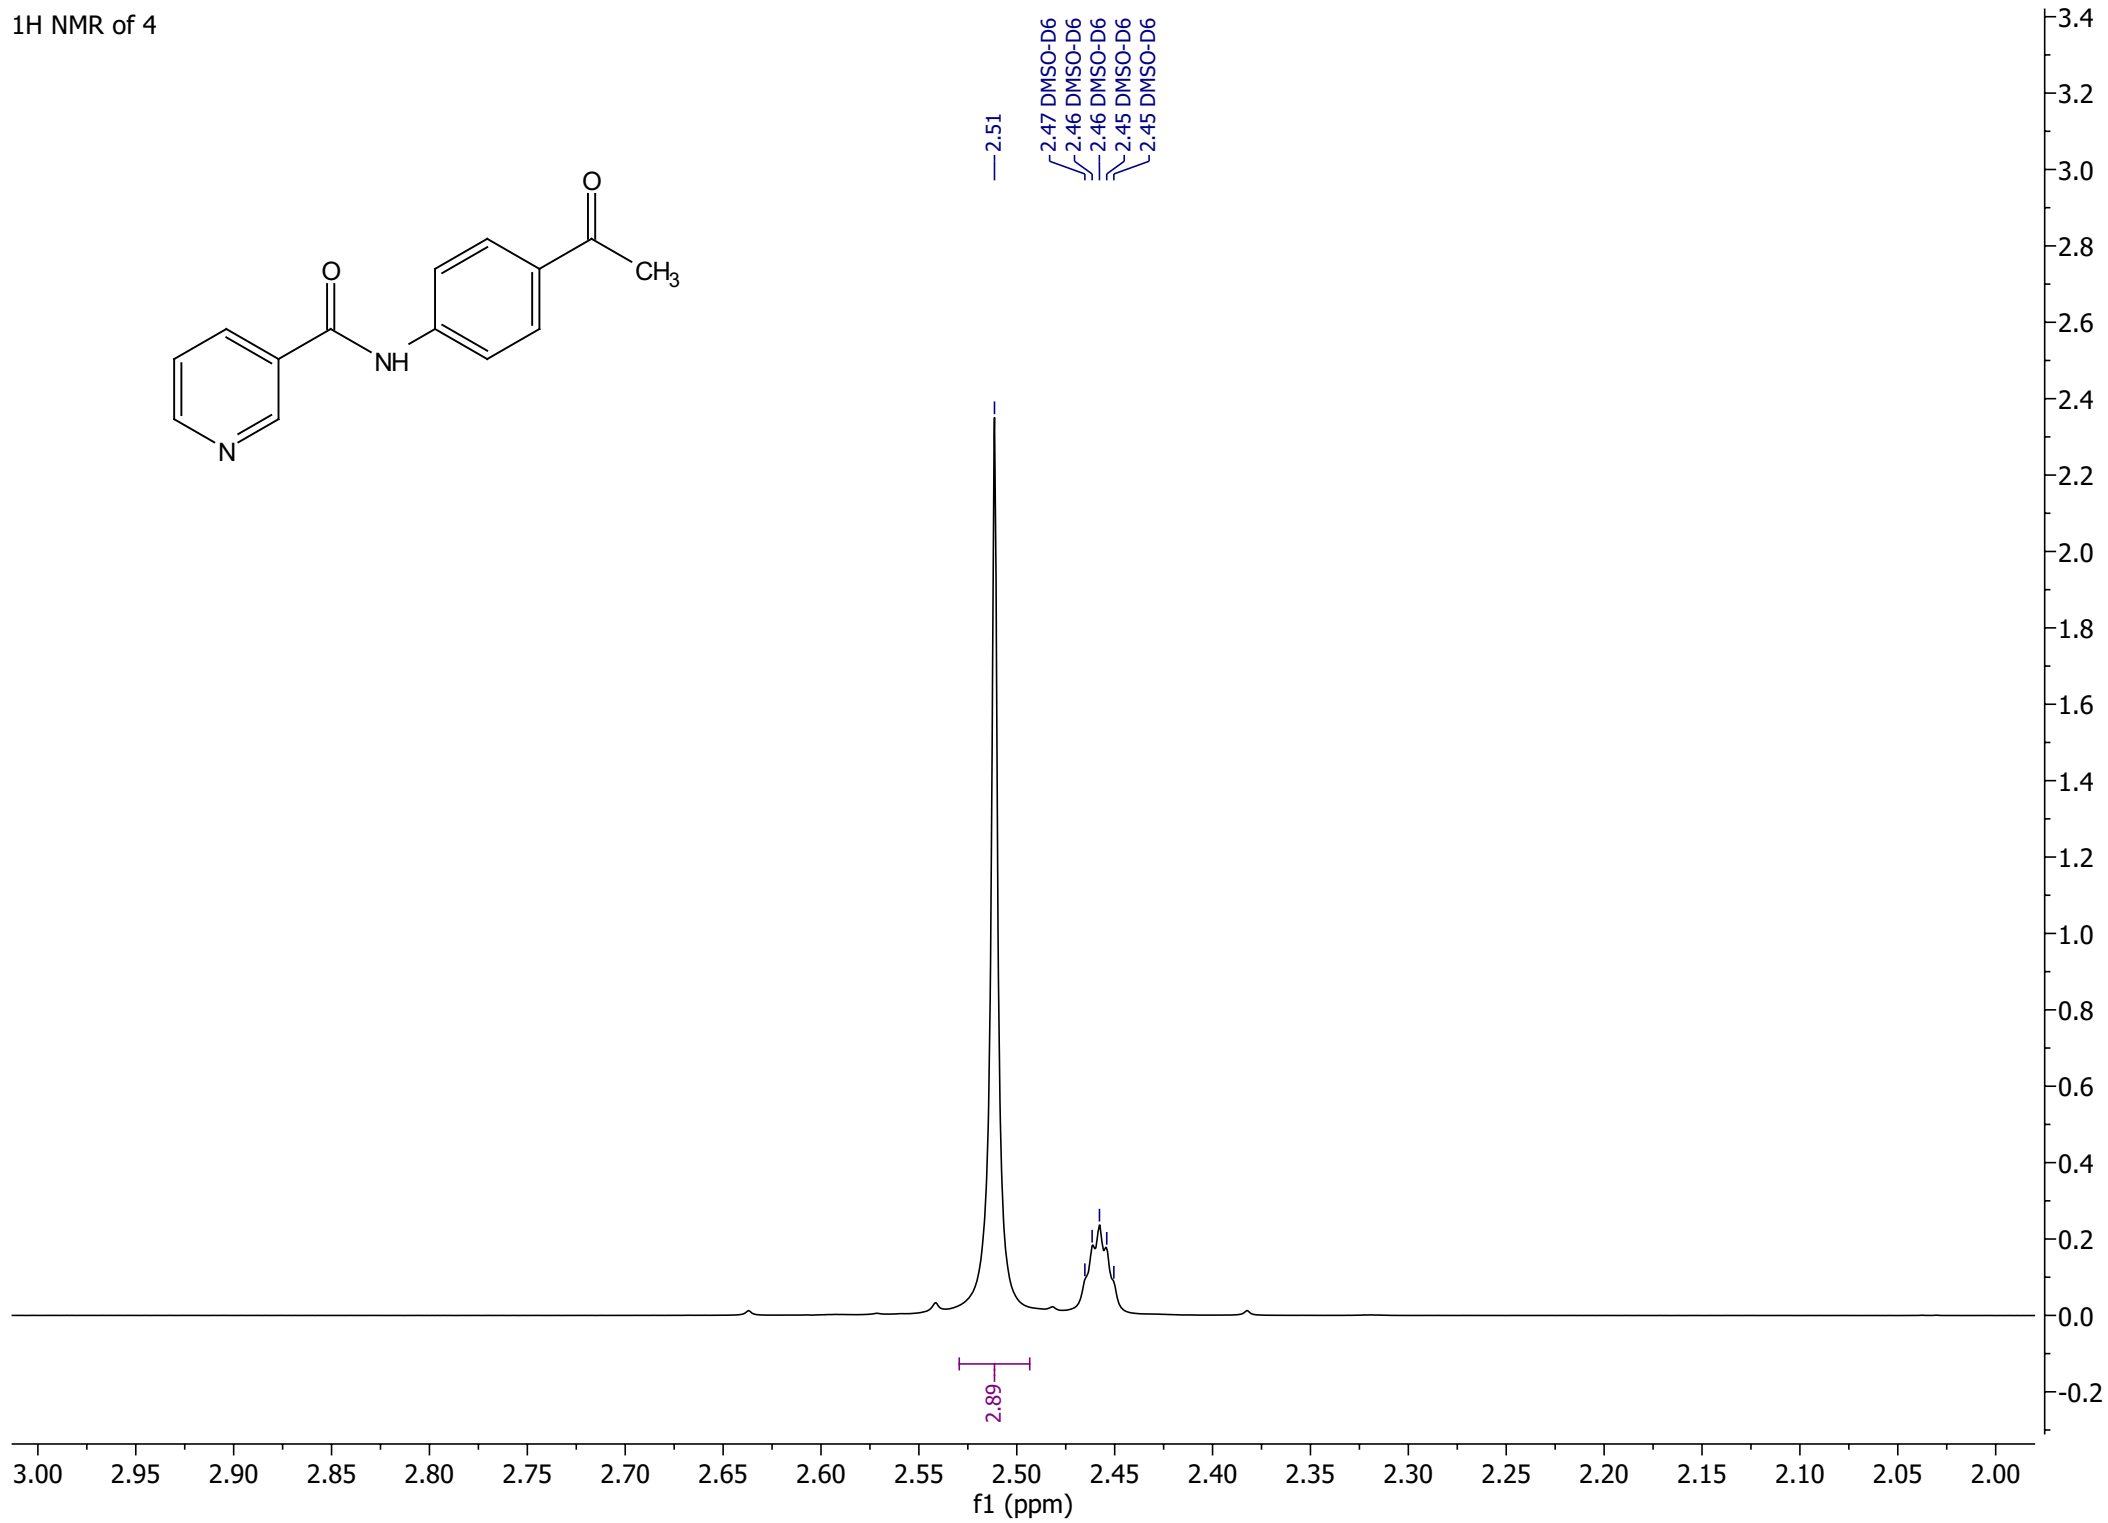

1H NMR of 4

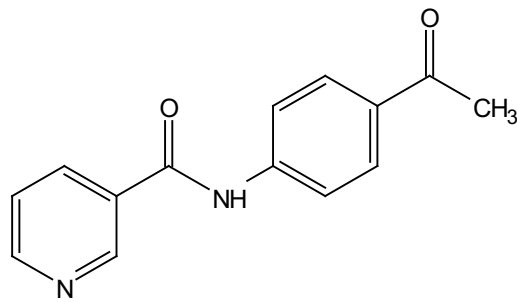

8.28  
8.28  
8.27  
8.26  
8.26

7.96  
7.95  
7.94  
7.94  
7.93  
7.91  
7.90  
7.90  
7.89  
7.88

7.56  
7.55  
7.55  
7.54  
7.54  
7.53  
7.53

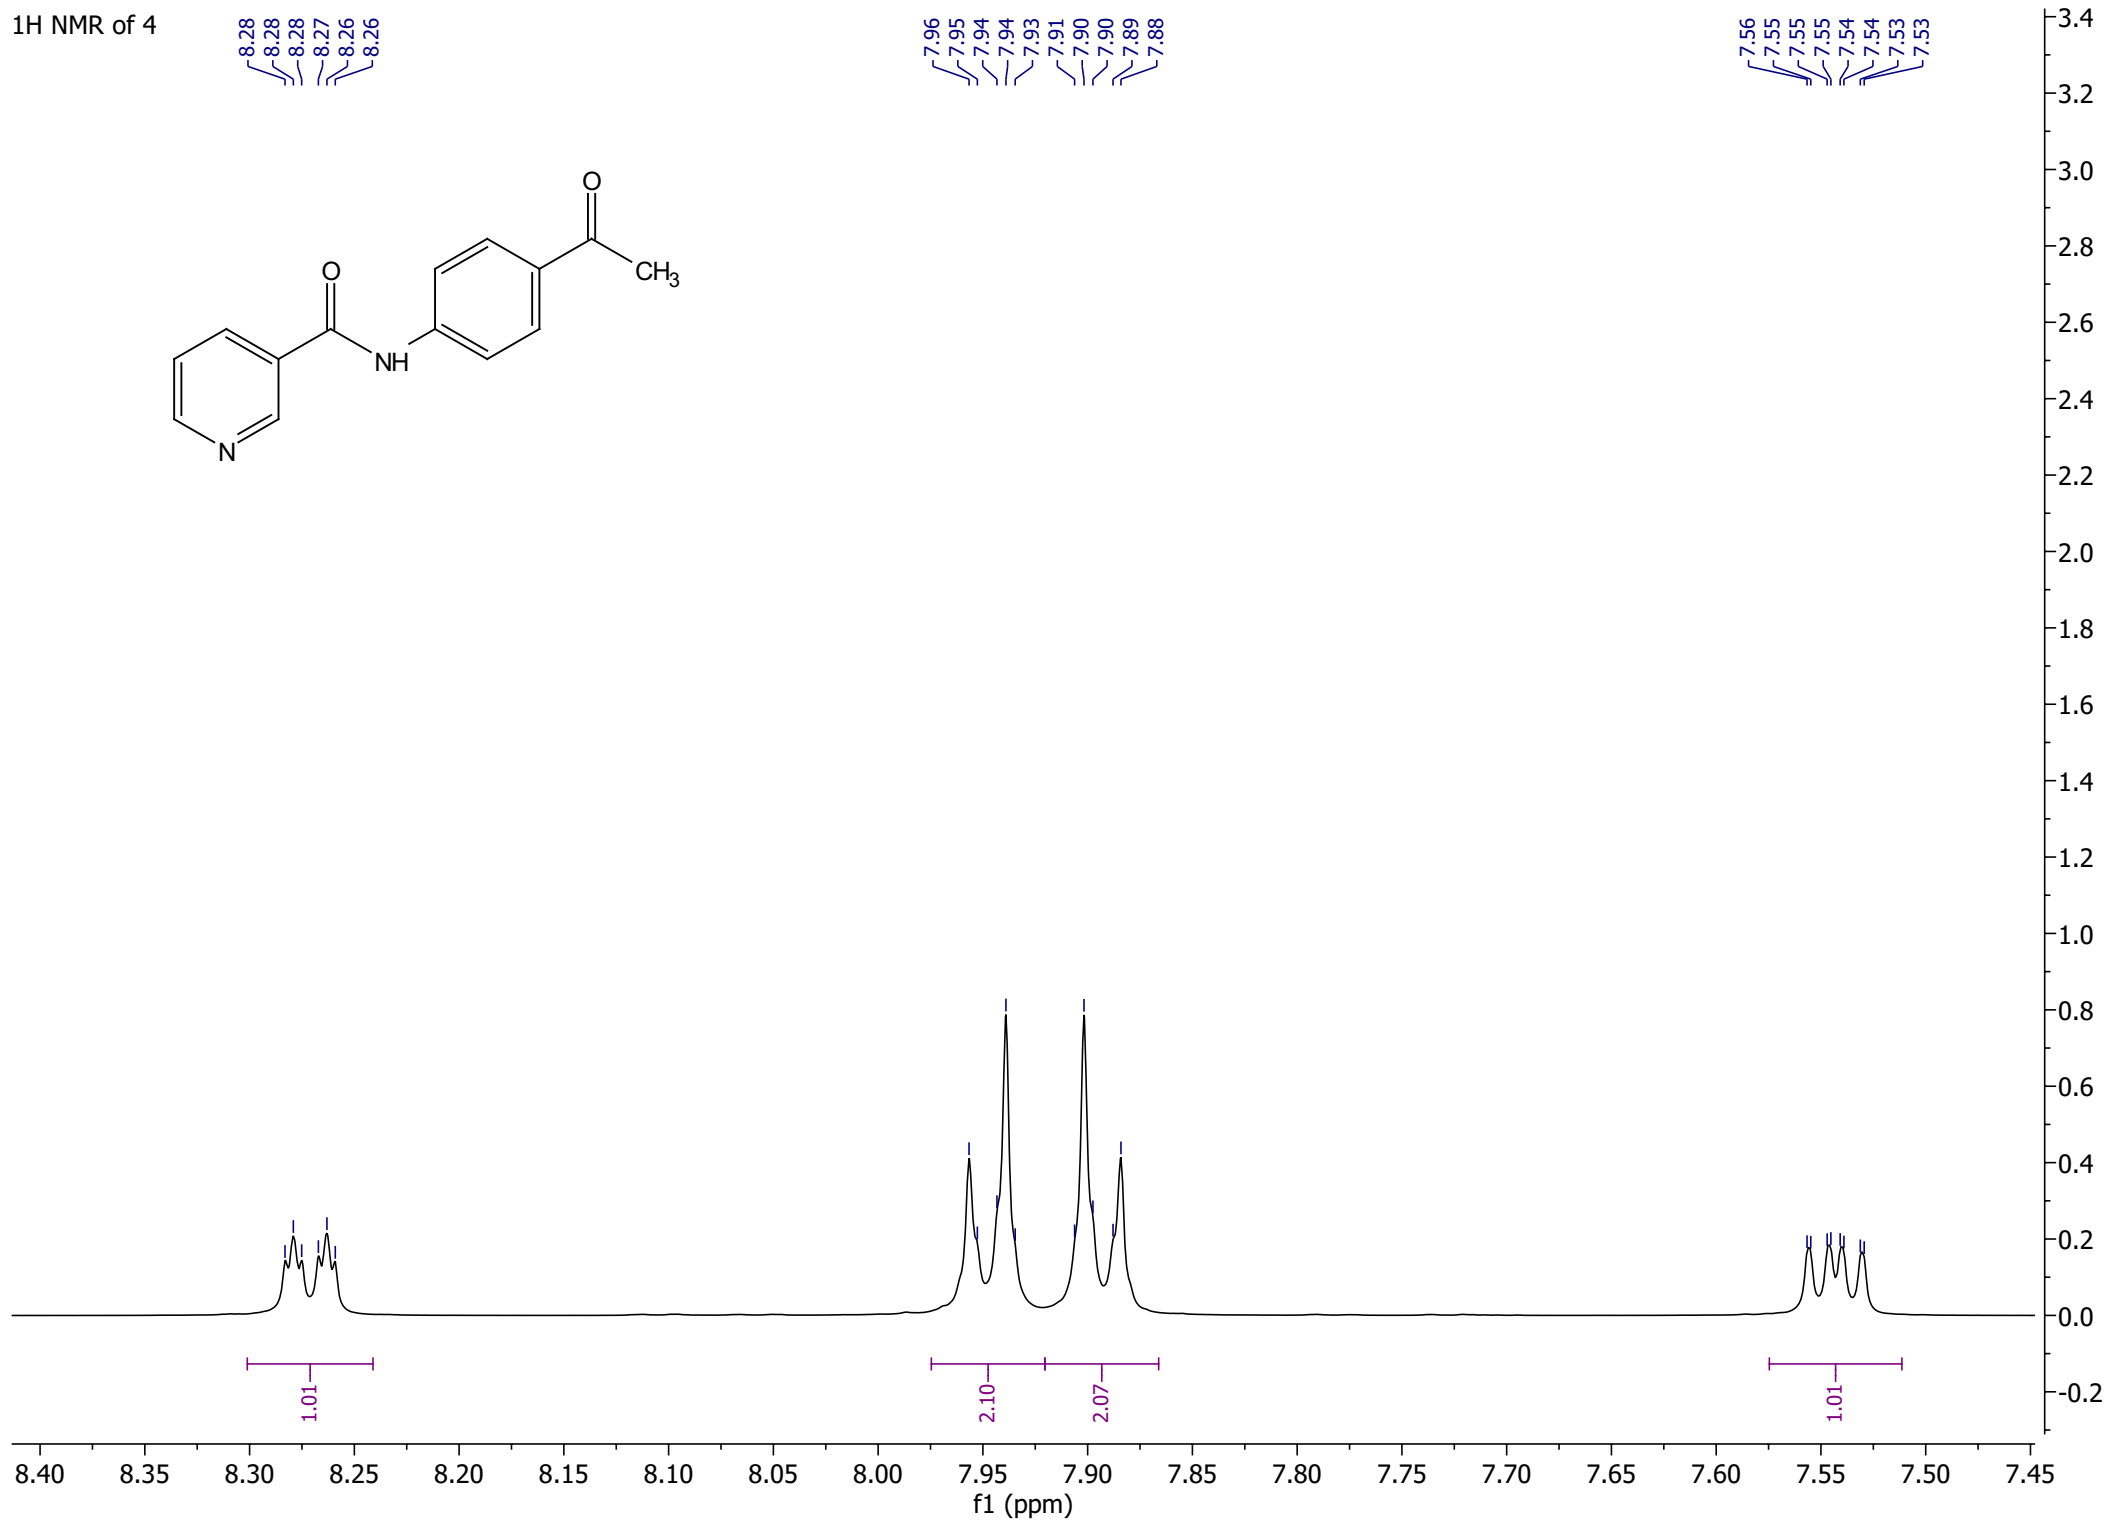

1H NMR of 4



9.08  
9.08  
9.08  
9.08

8.75  
8.74  
8.74  
8.73

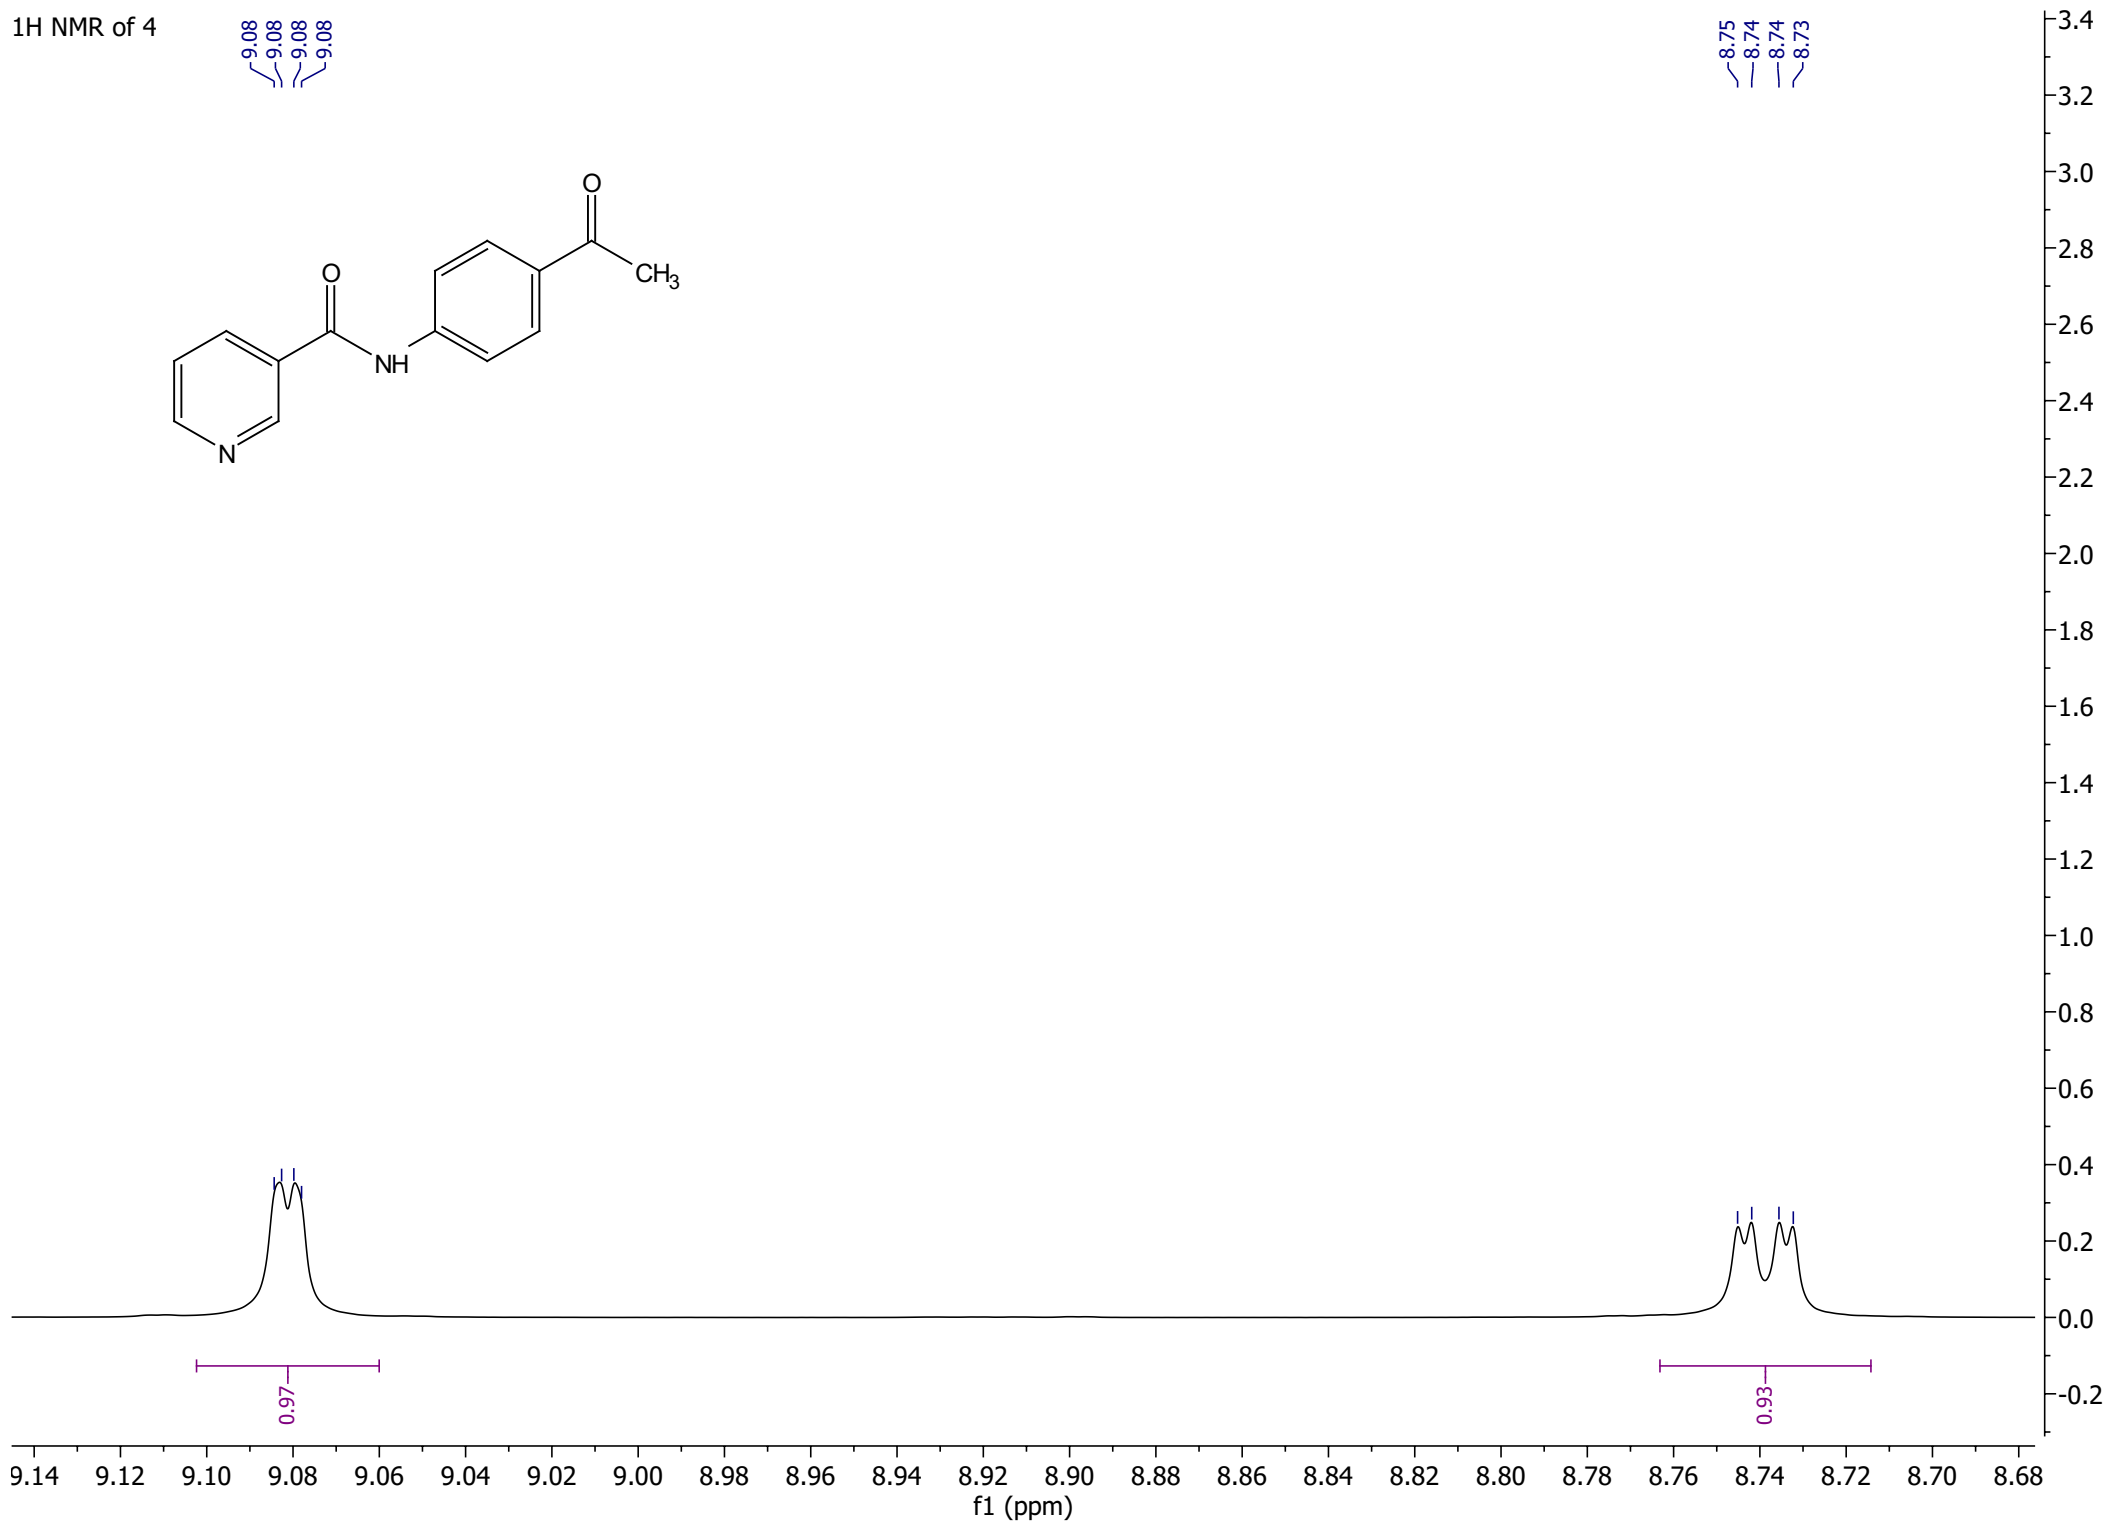



<sup>1</sup>H NMR of 4

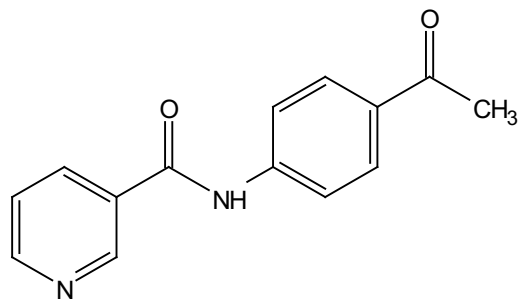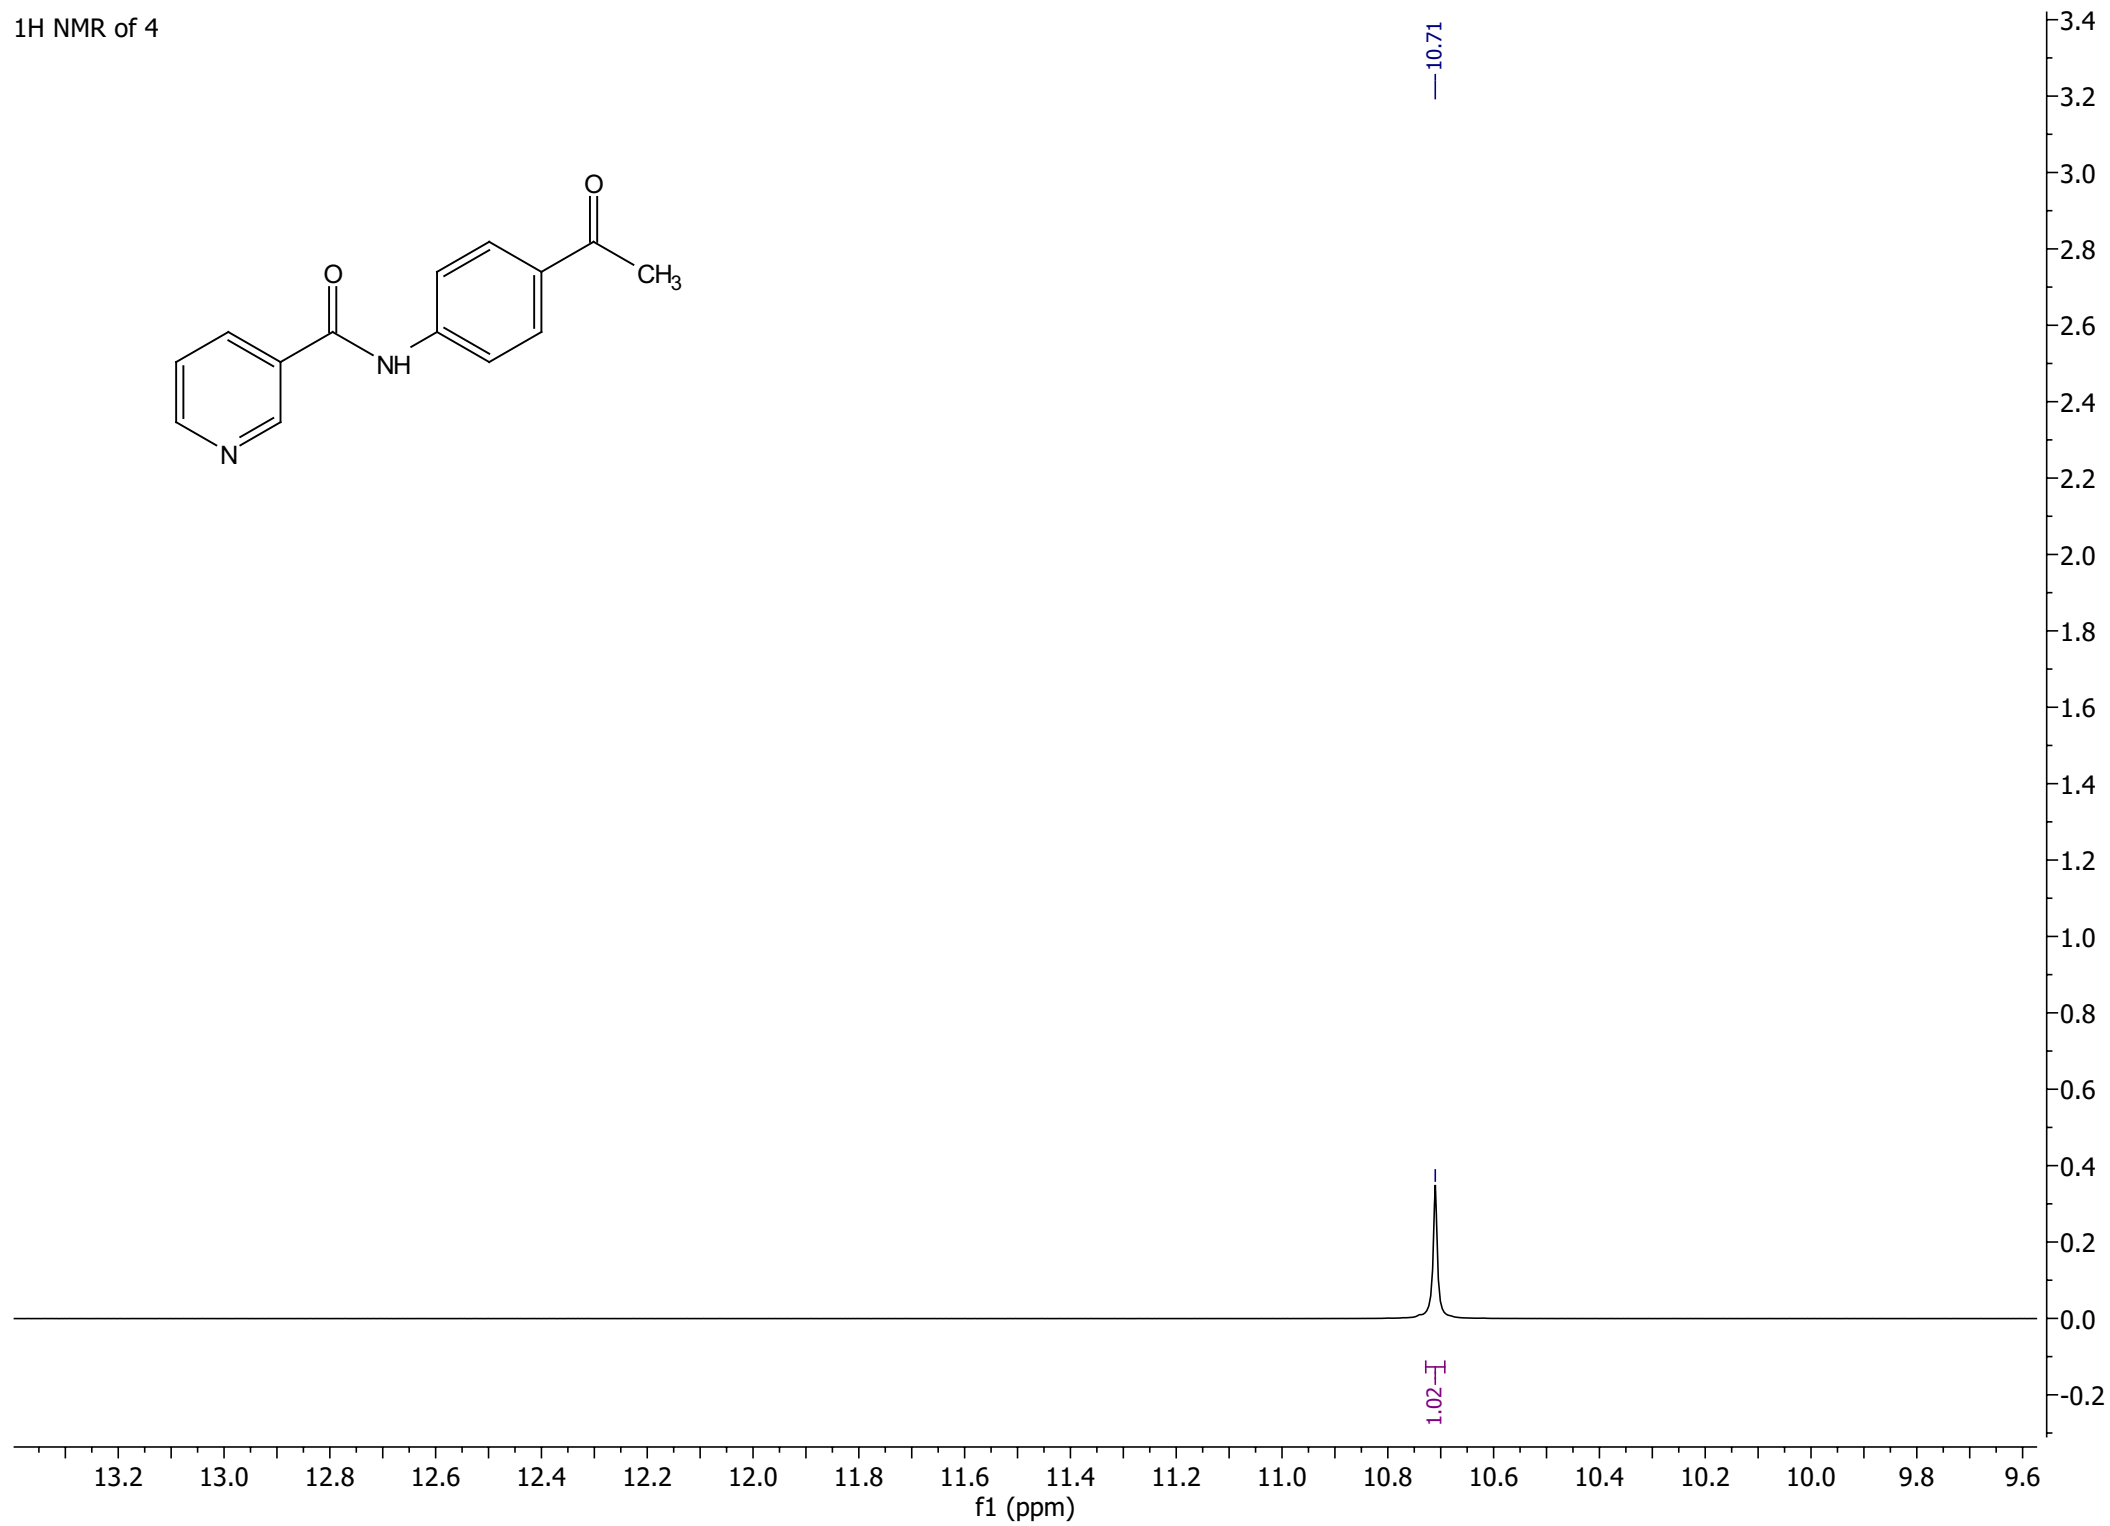

<sup>13</sup>C NMR of 4

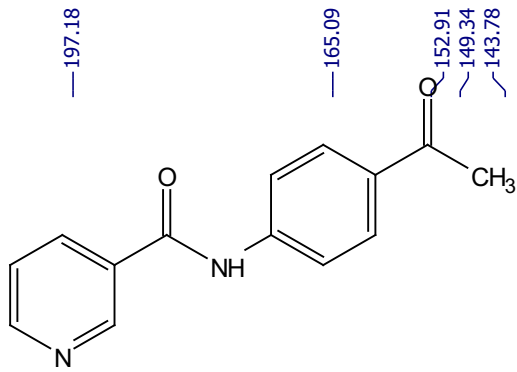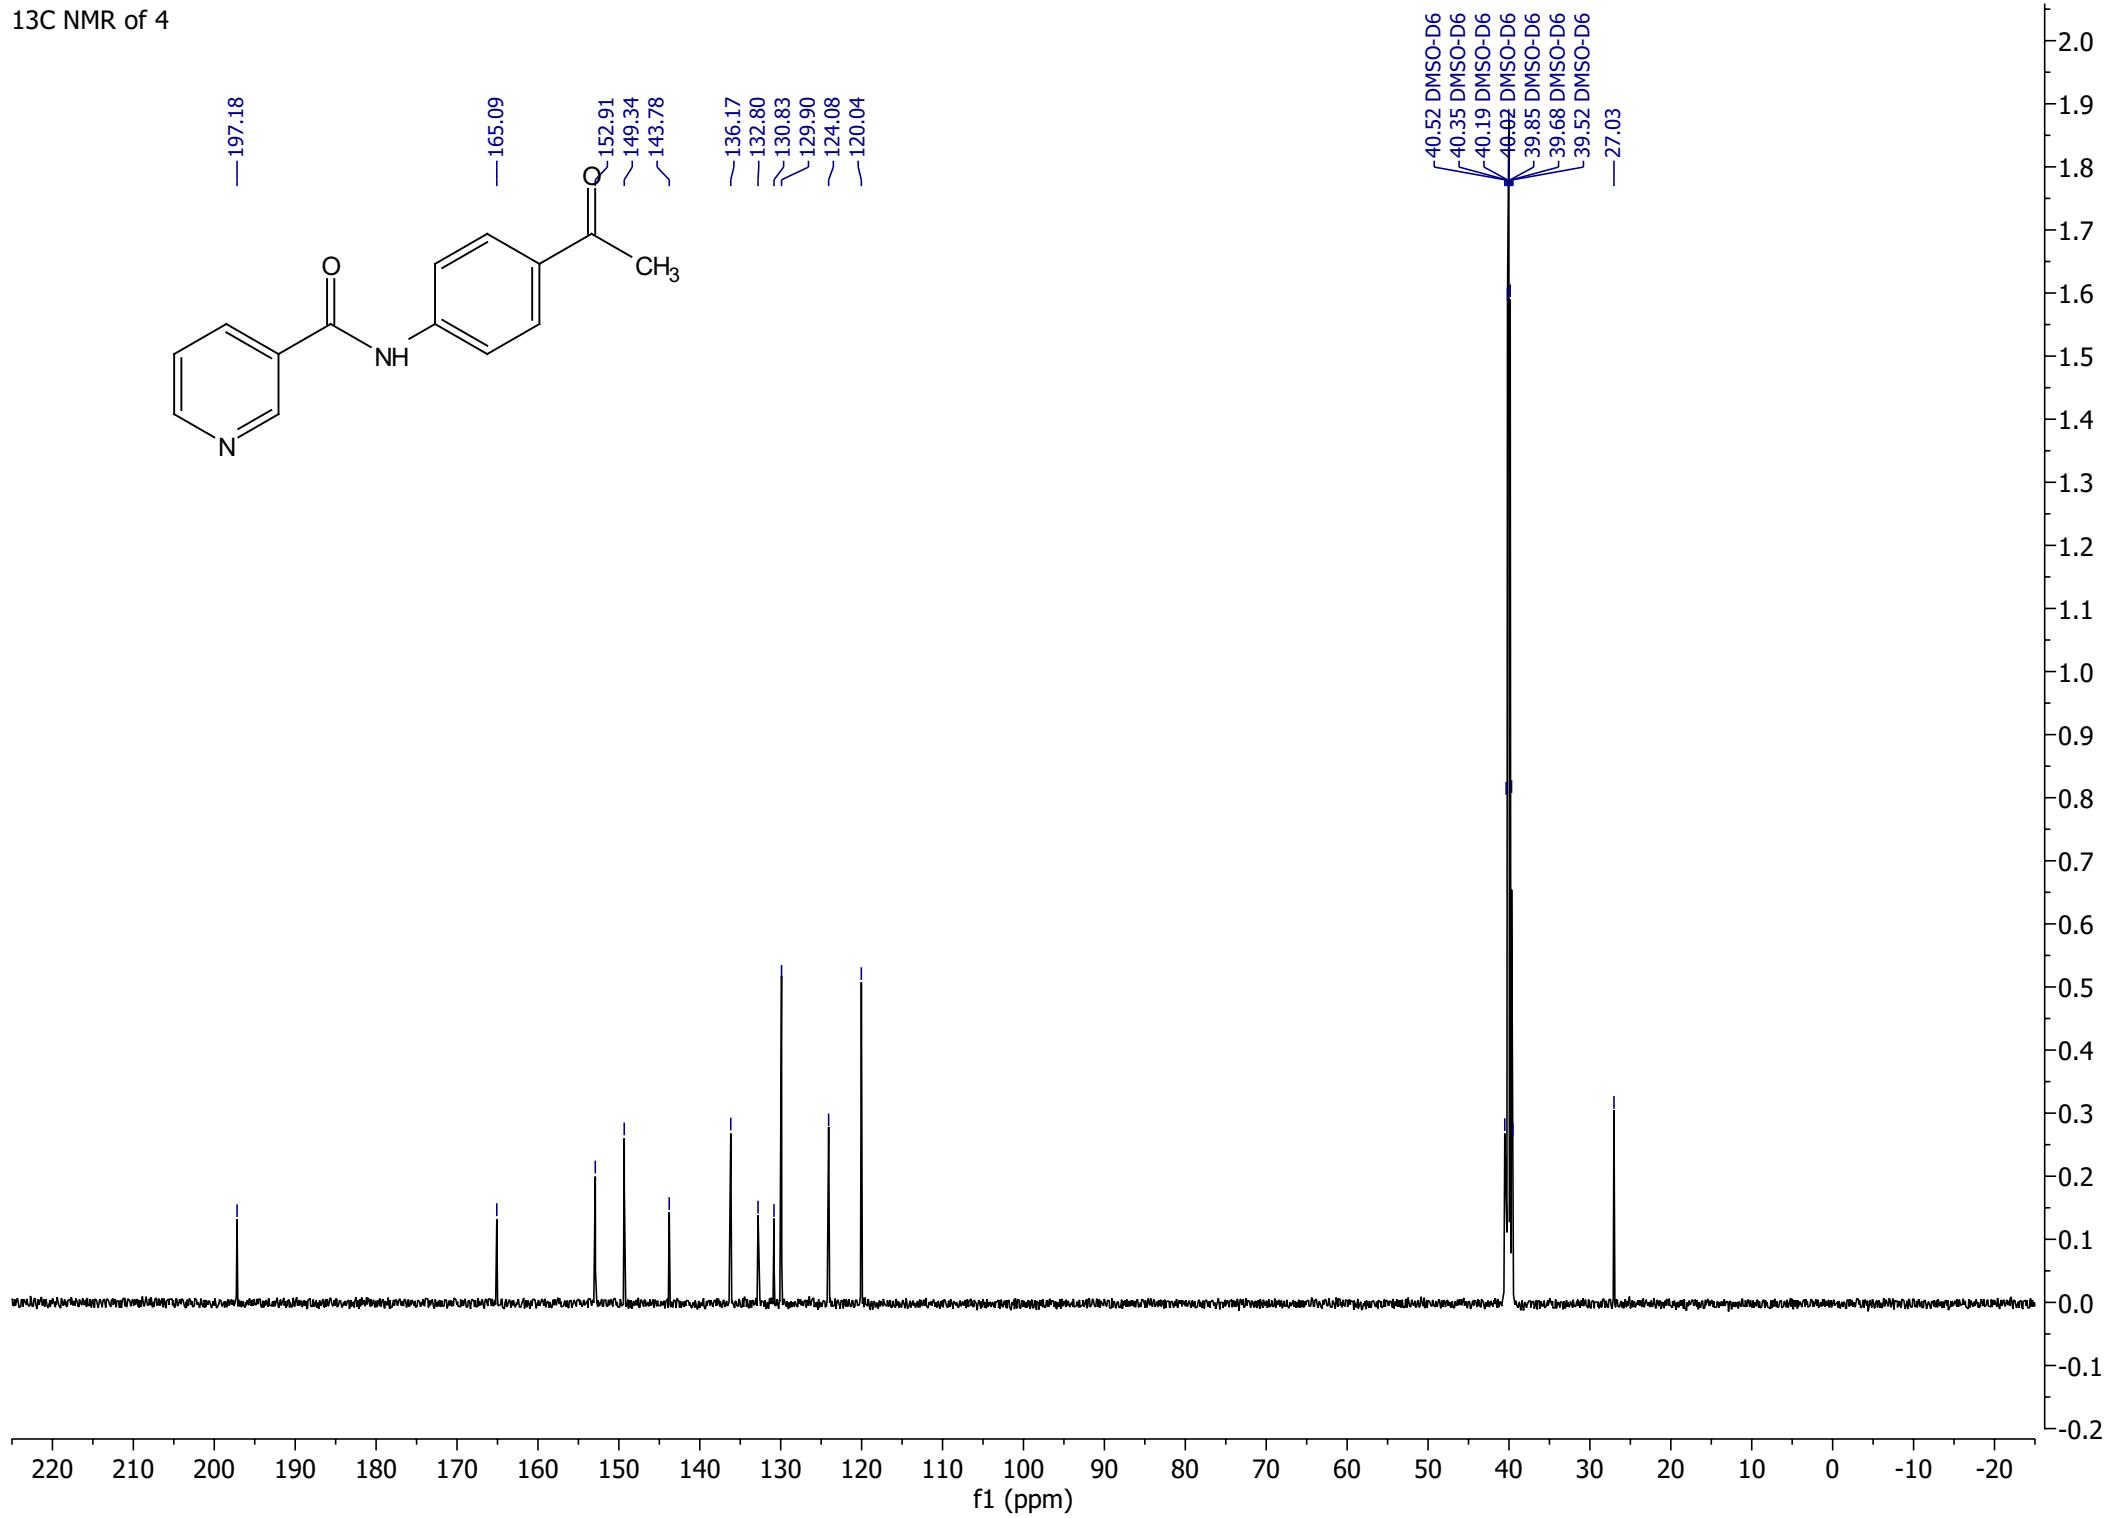

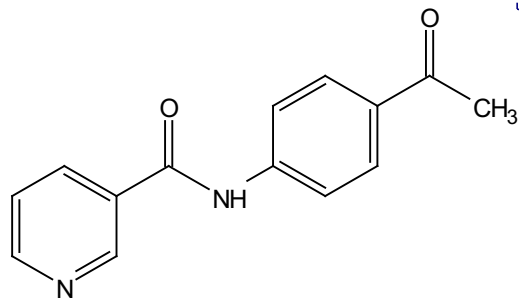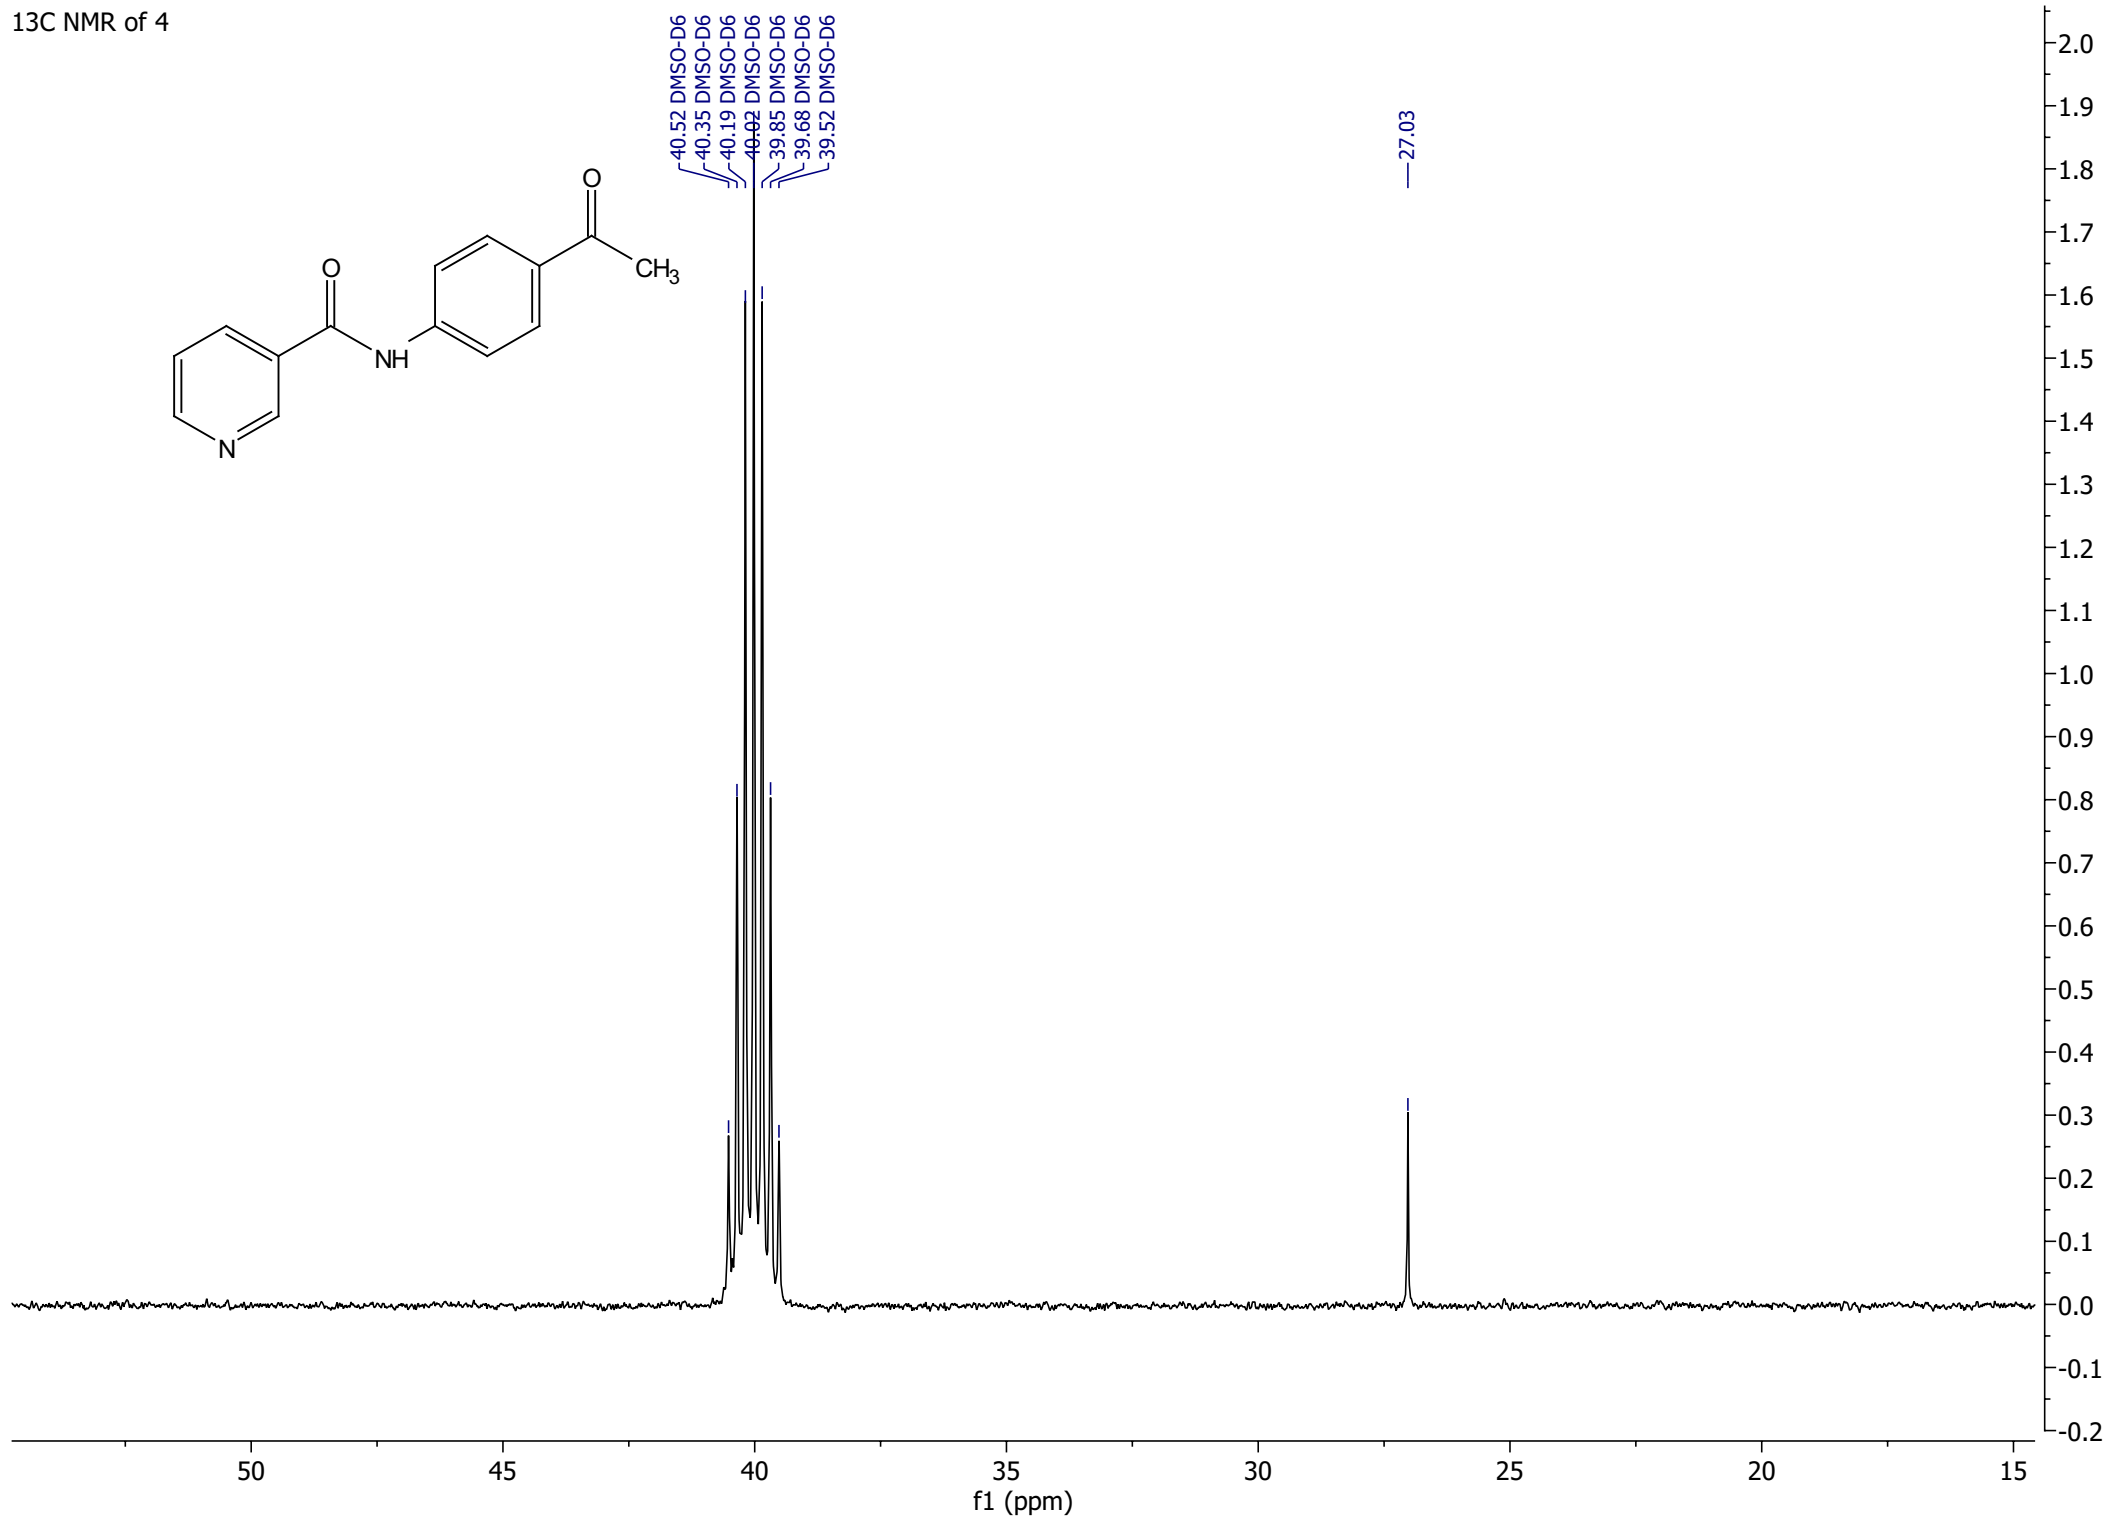

13C NMR of 4

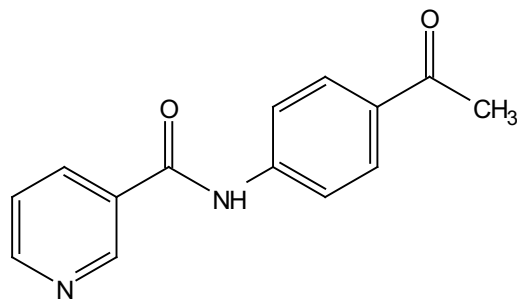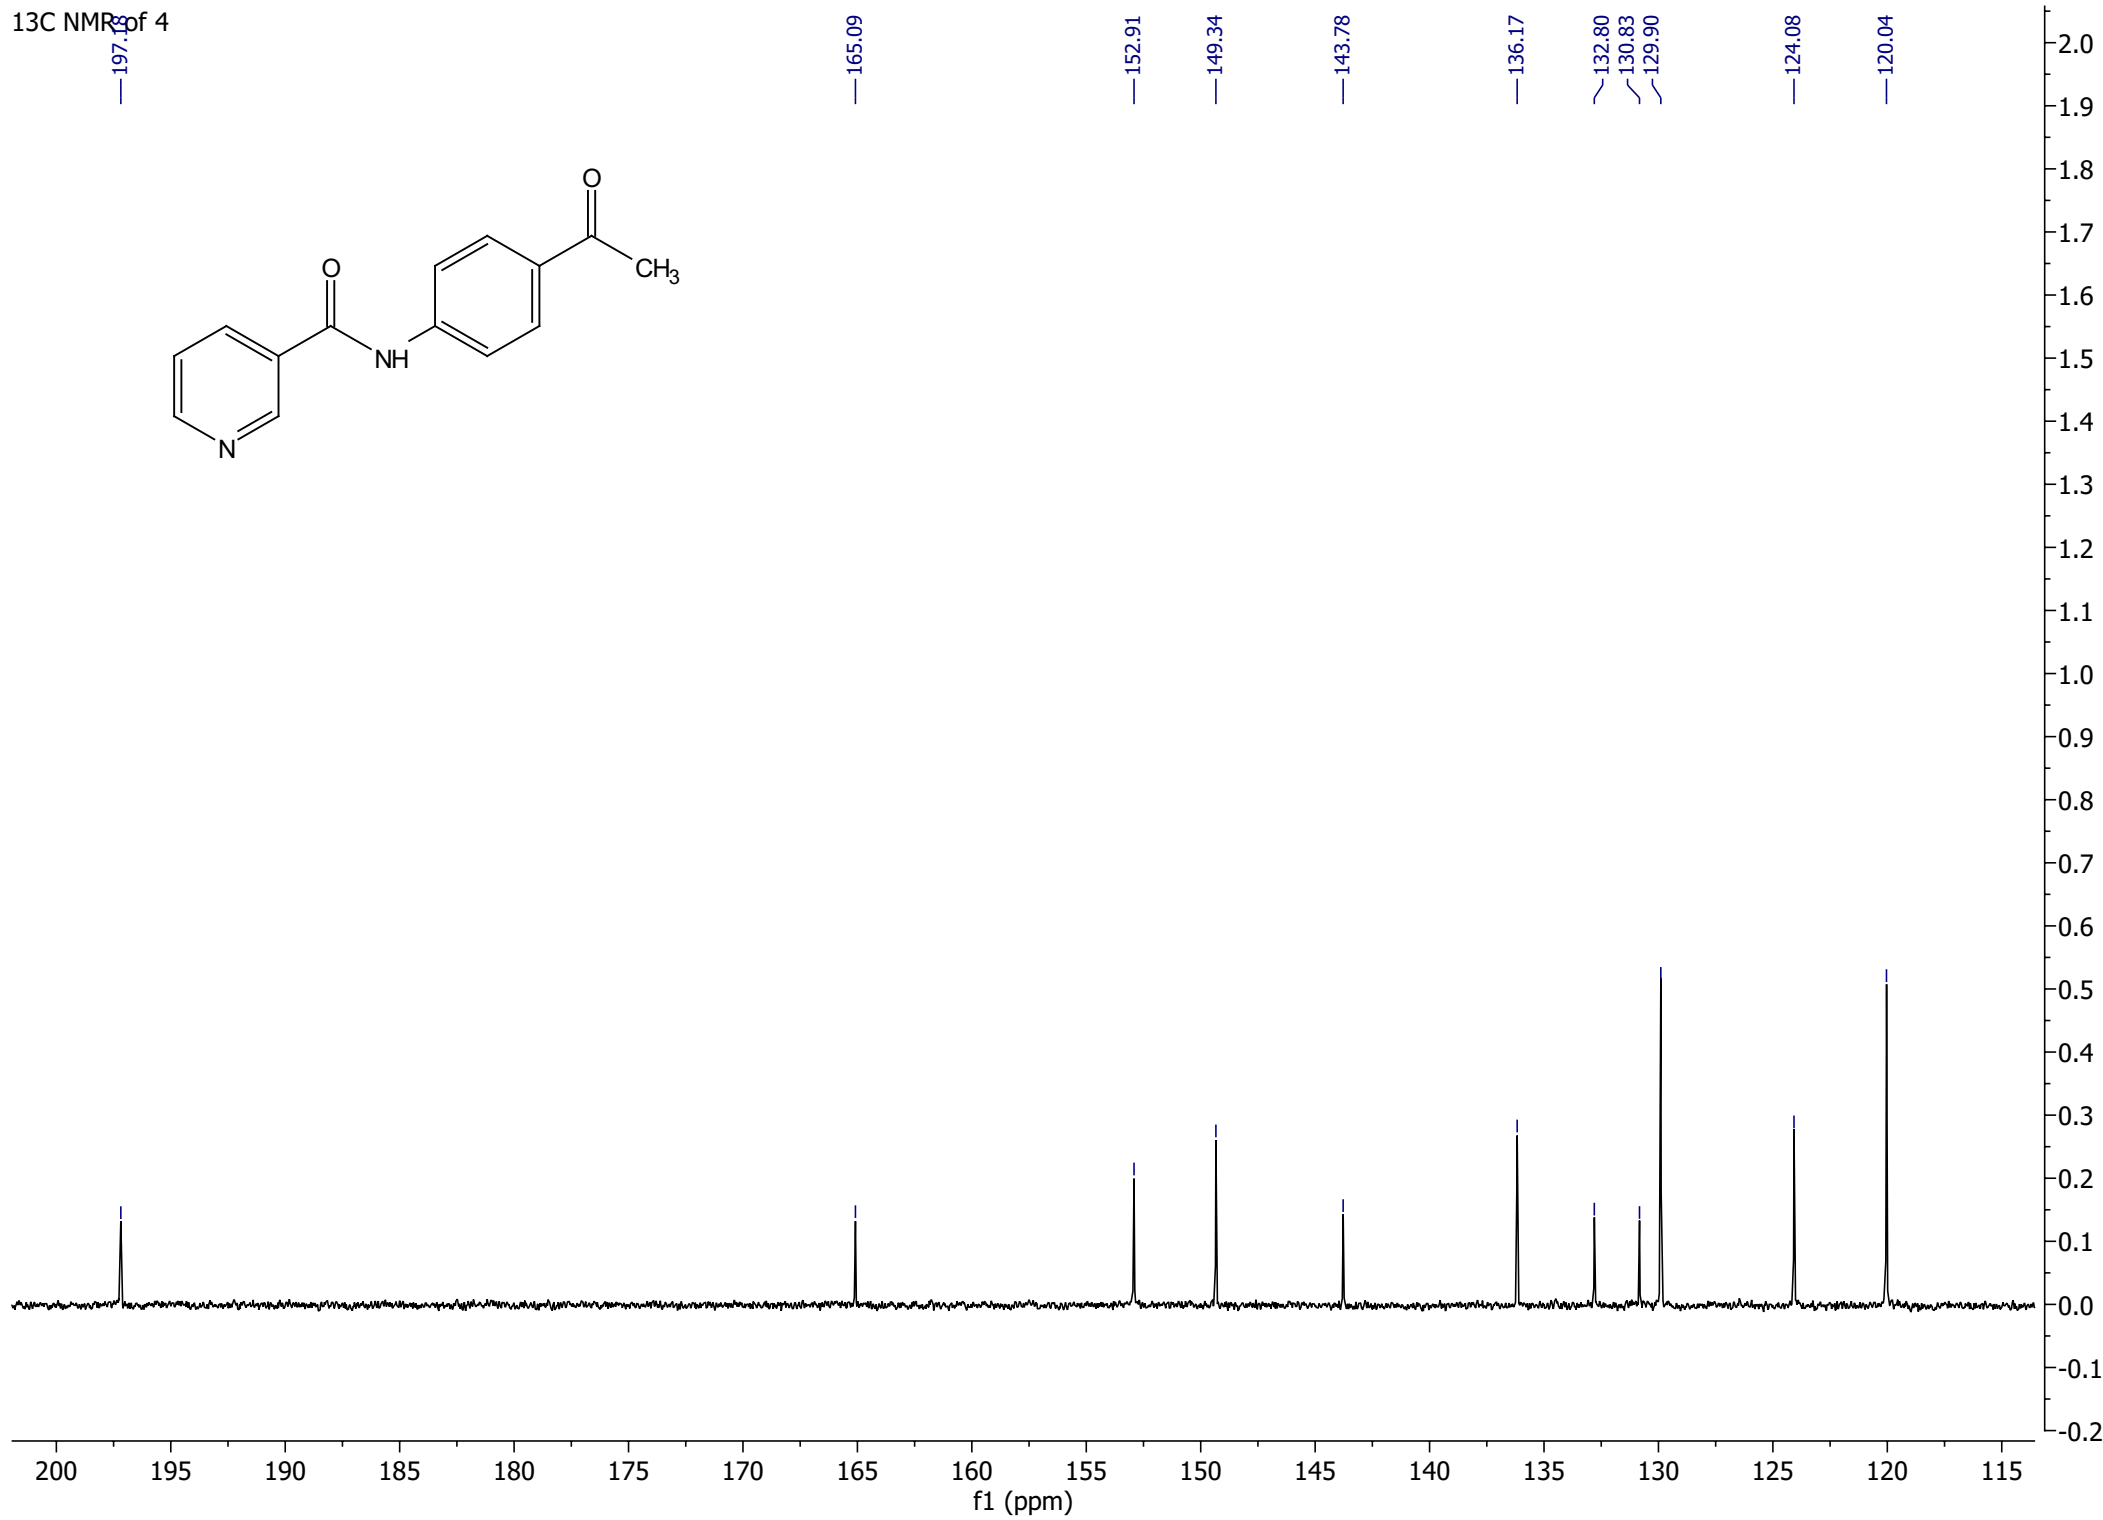

1H NMR of 9

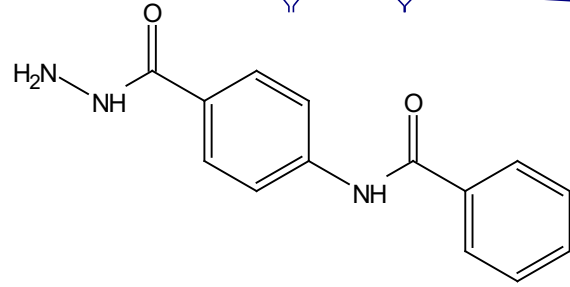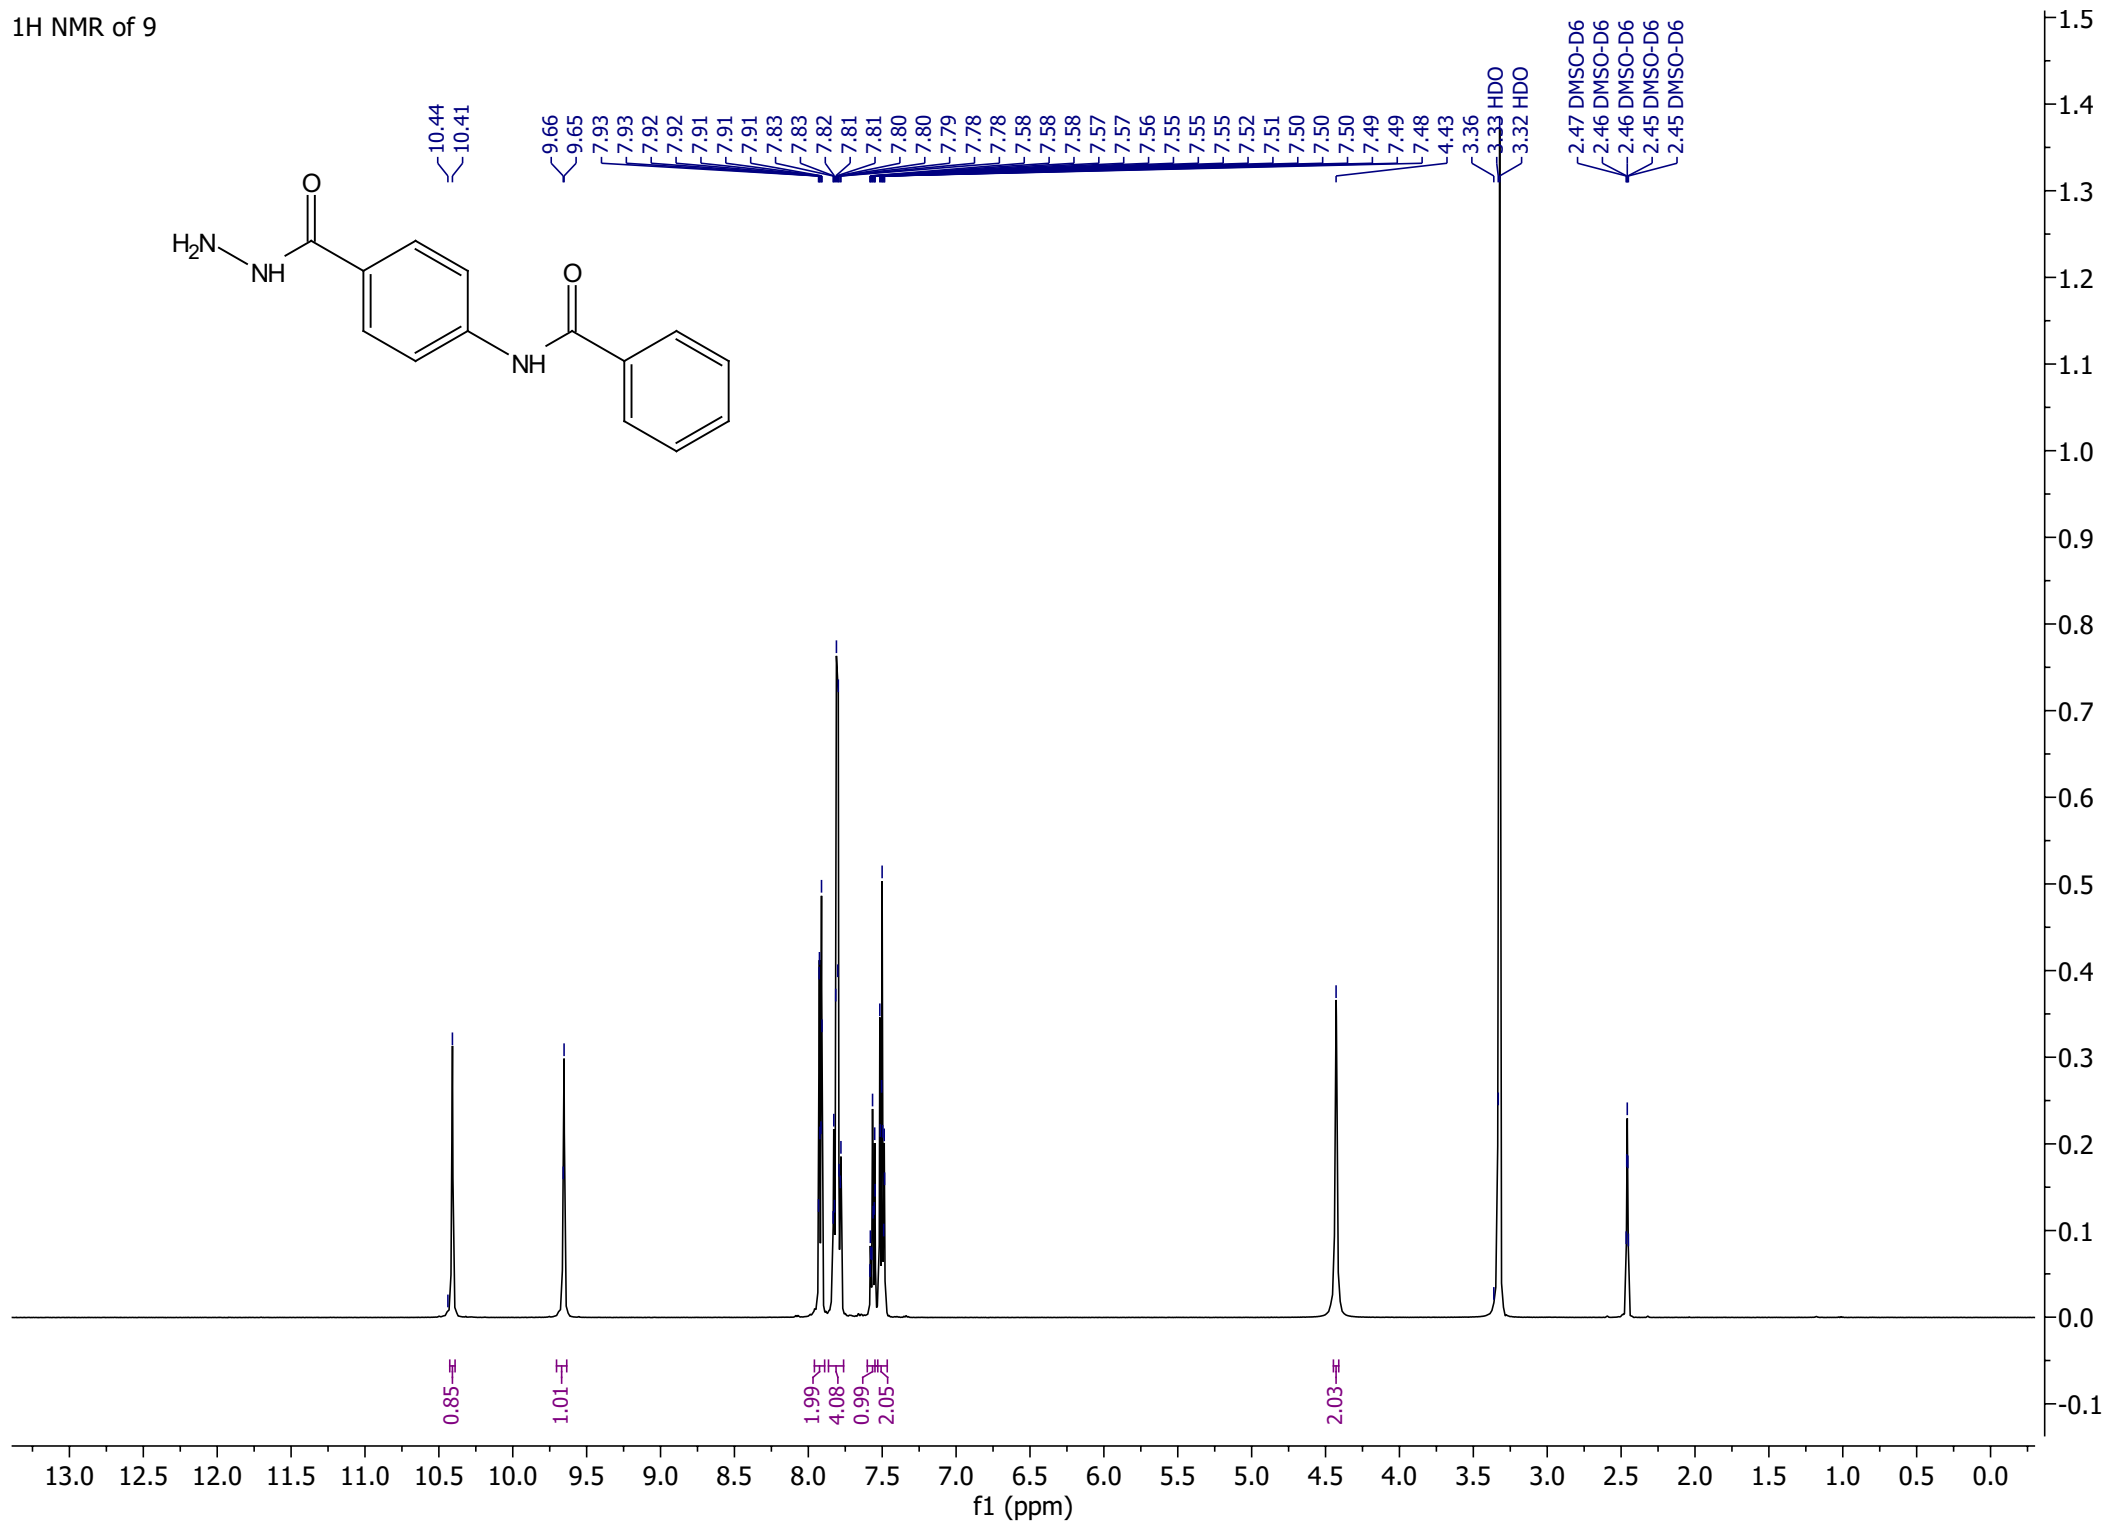

<sup>1</sup>H NMR of 9

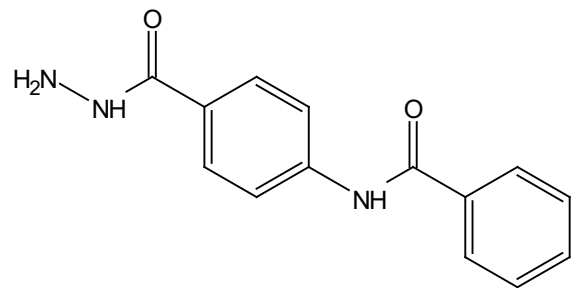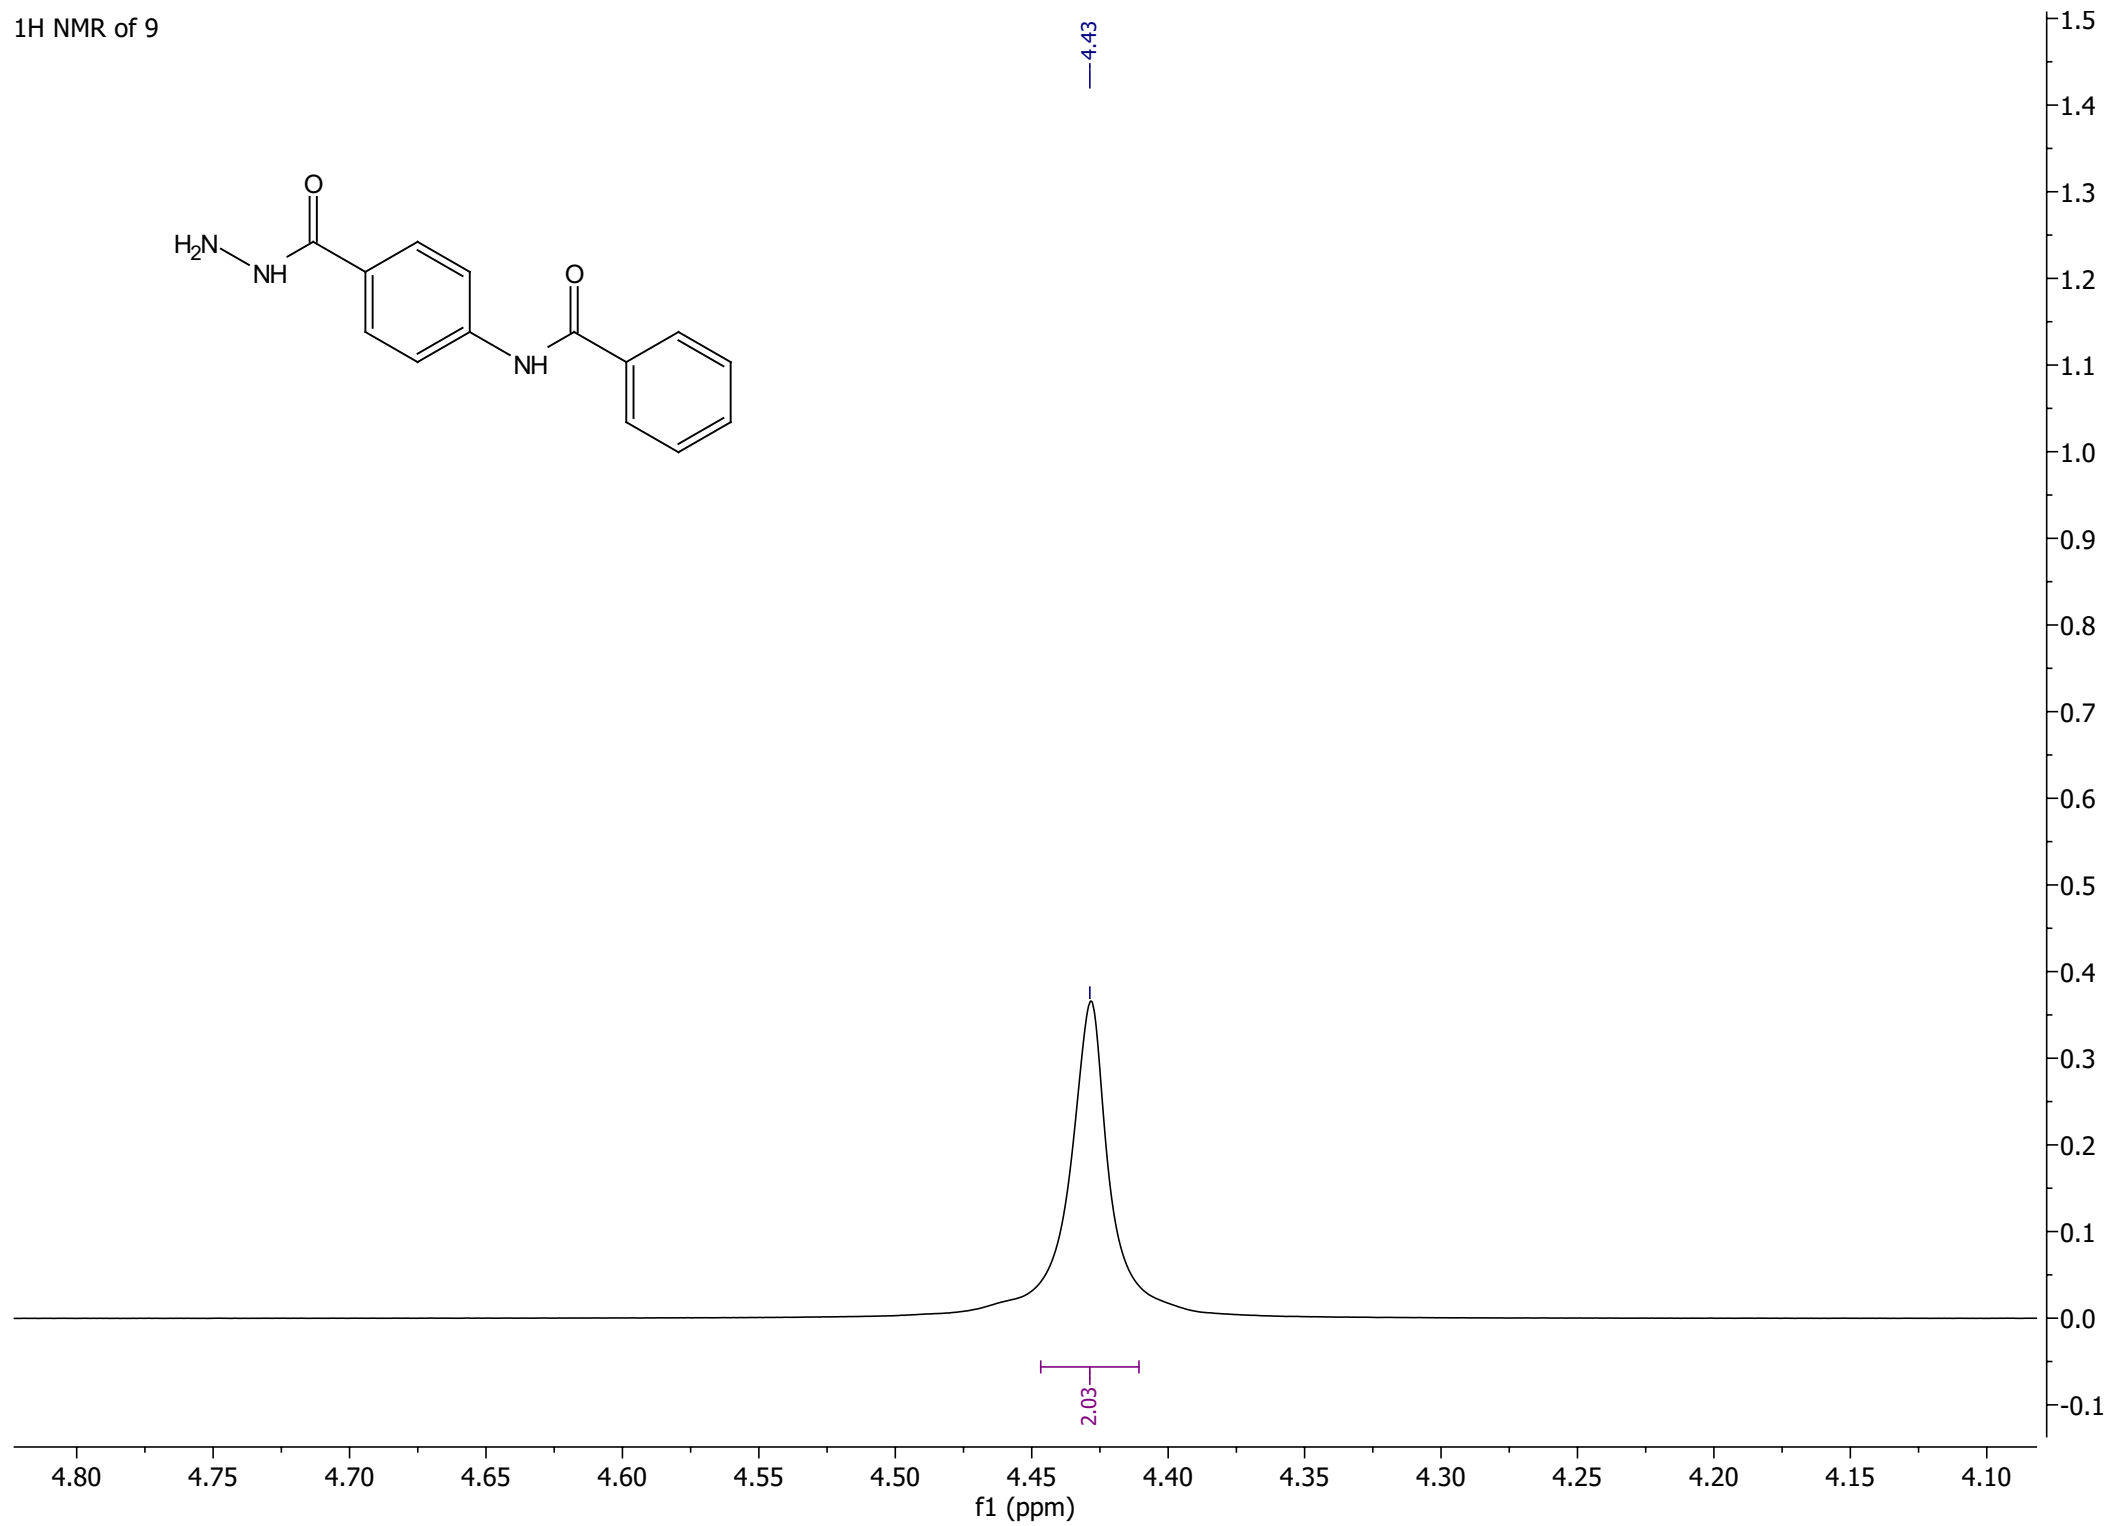

<sup>1</sup>H NMR of 9

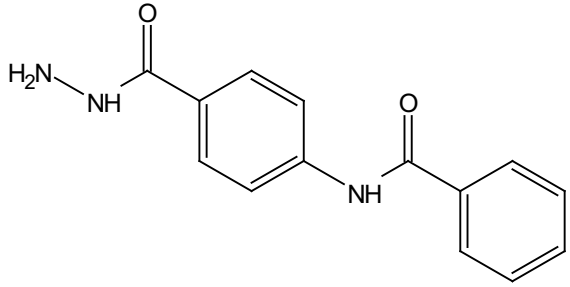

7.99  
7.93  
7.92  
7.92  
7.91  
7.91

7.83  
7.83  
7.82  
7.81  
7.81  
7.80  
7.80  
7.79  
7.78  
7.78

7.58  
7.58  
7.58  
7.57  
7.57  
7.56  
7.55  
7.55

7.52  
7.51  
7.50  
7.50  
7.50  
7.49  
7.49  
7.48

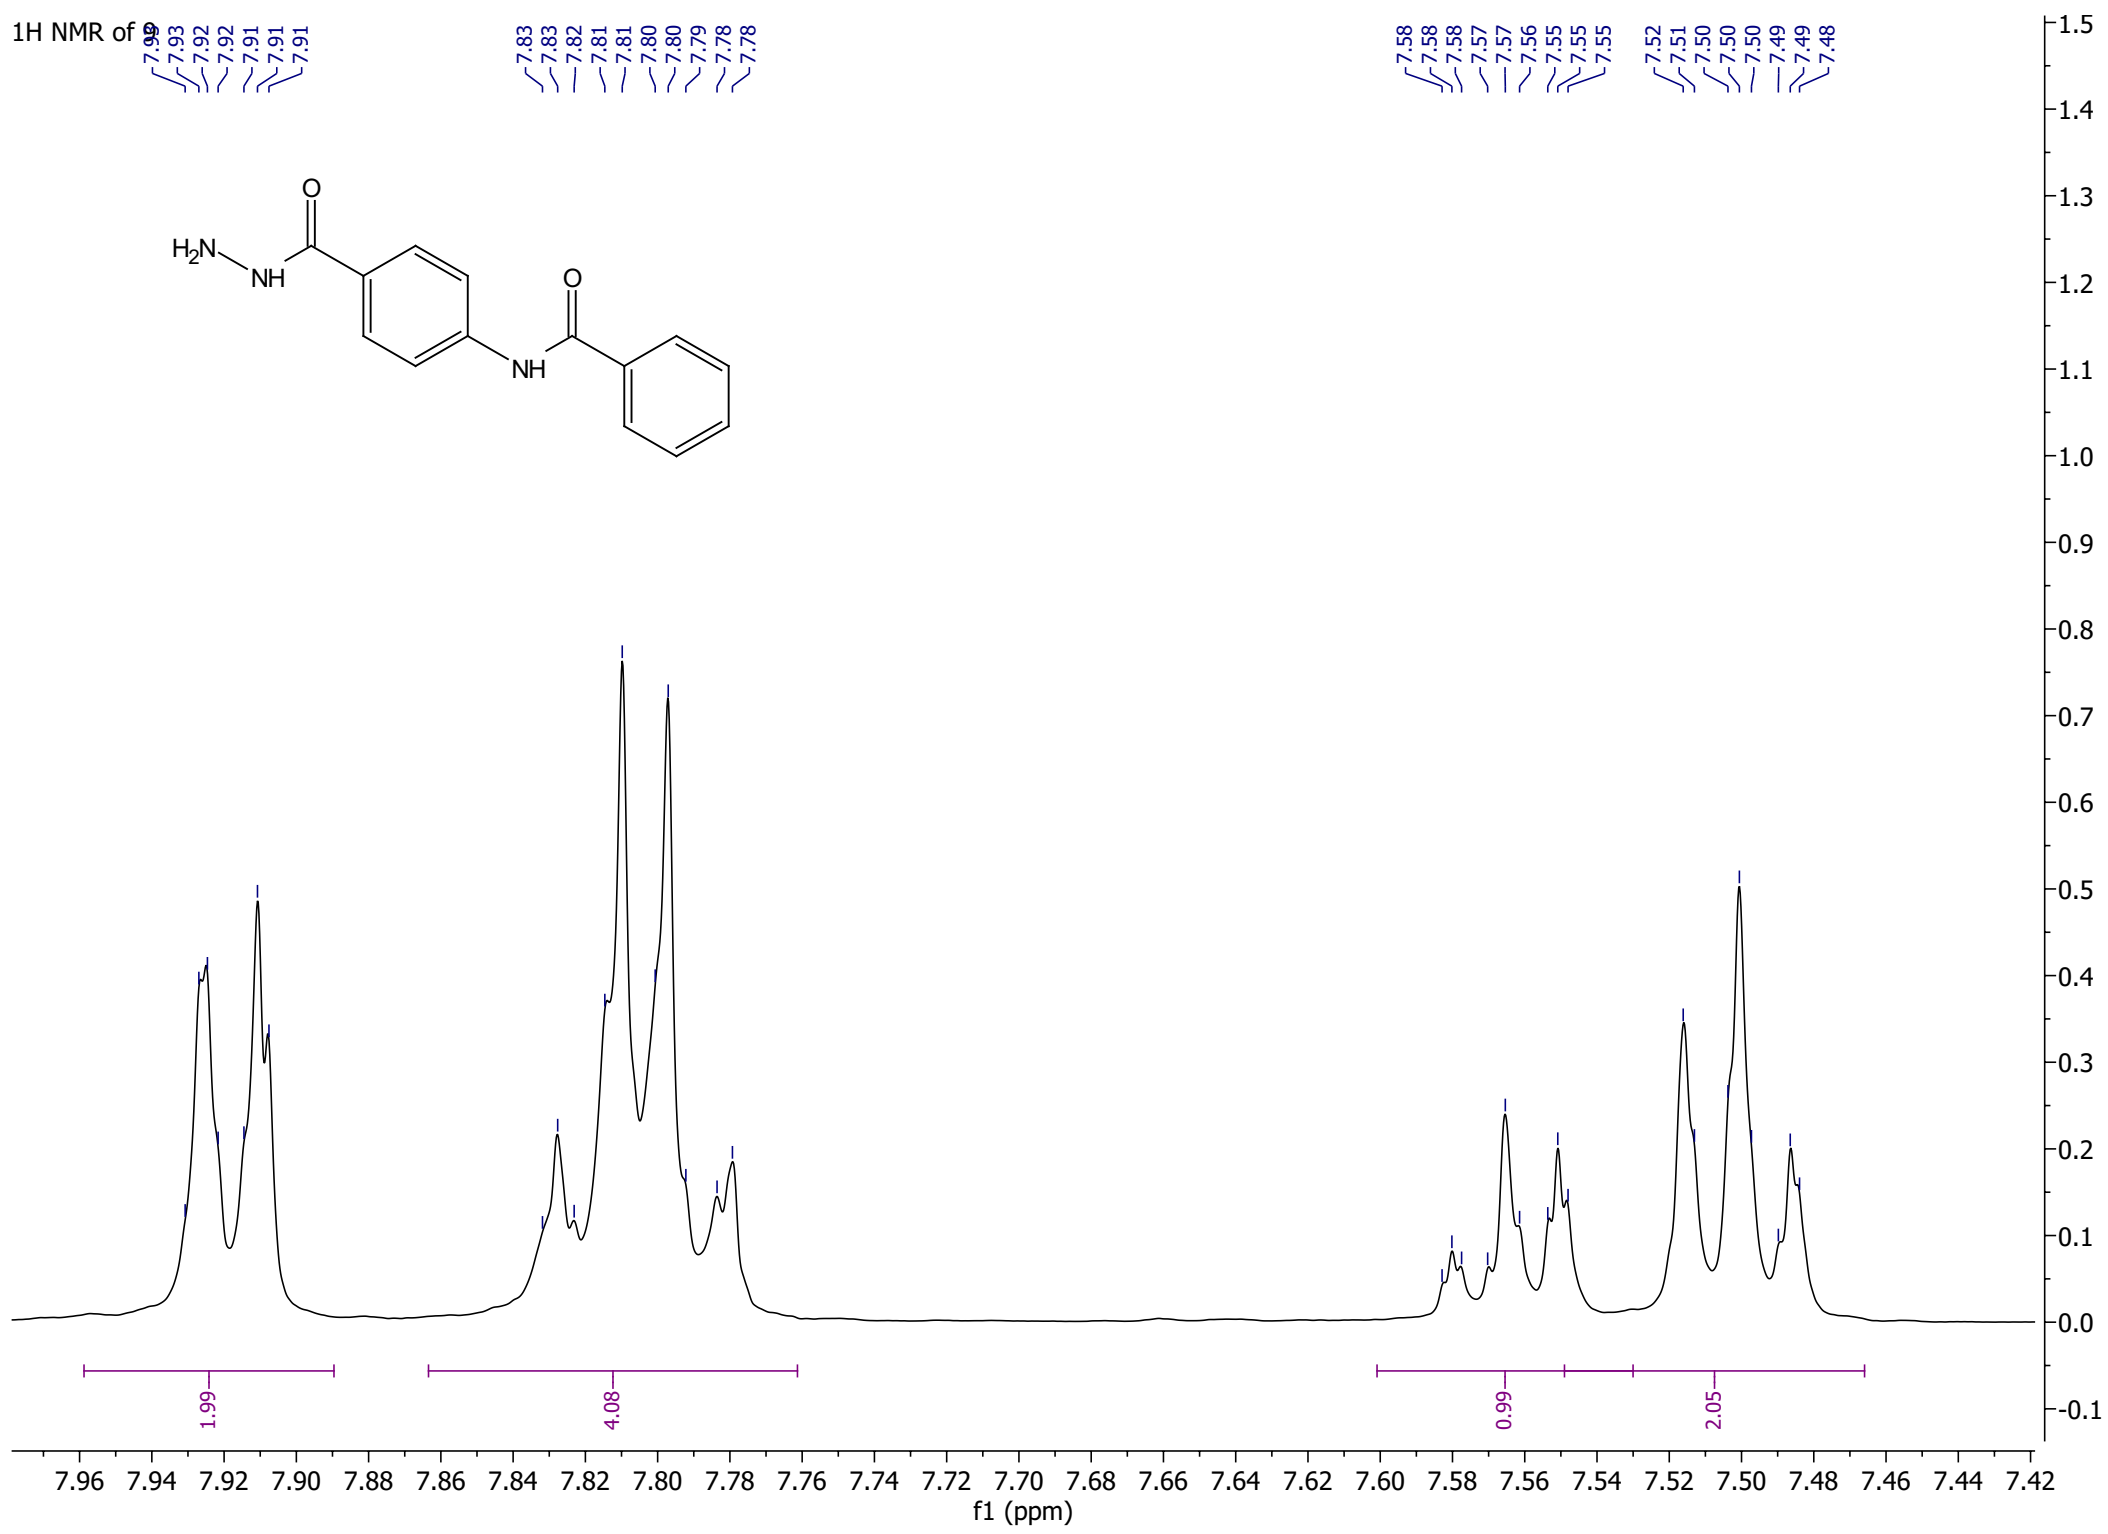

<sup>1</sup>H NMR of 9

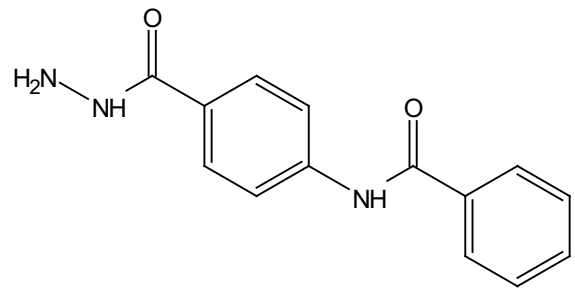

— 10.44  
— 10.41

— 9.66  
— 9.65

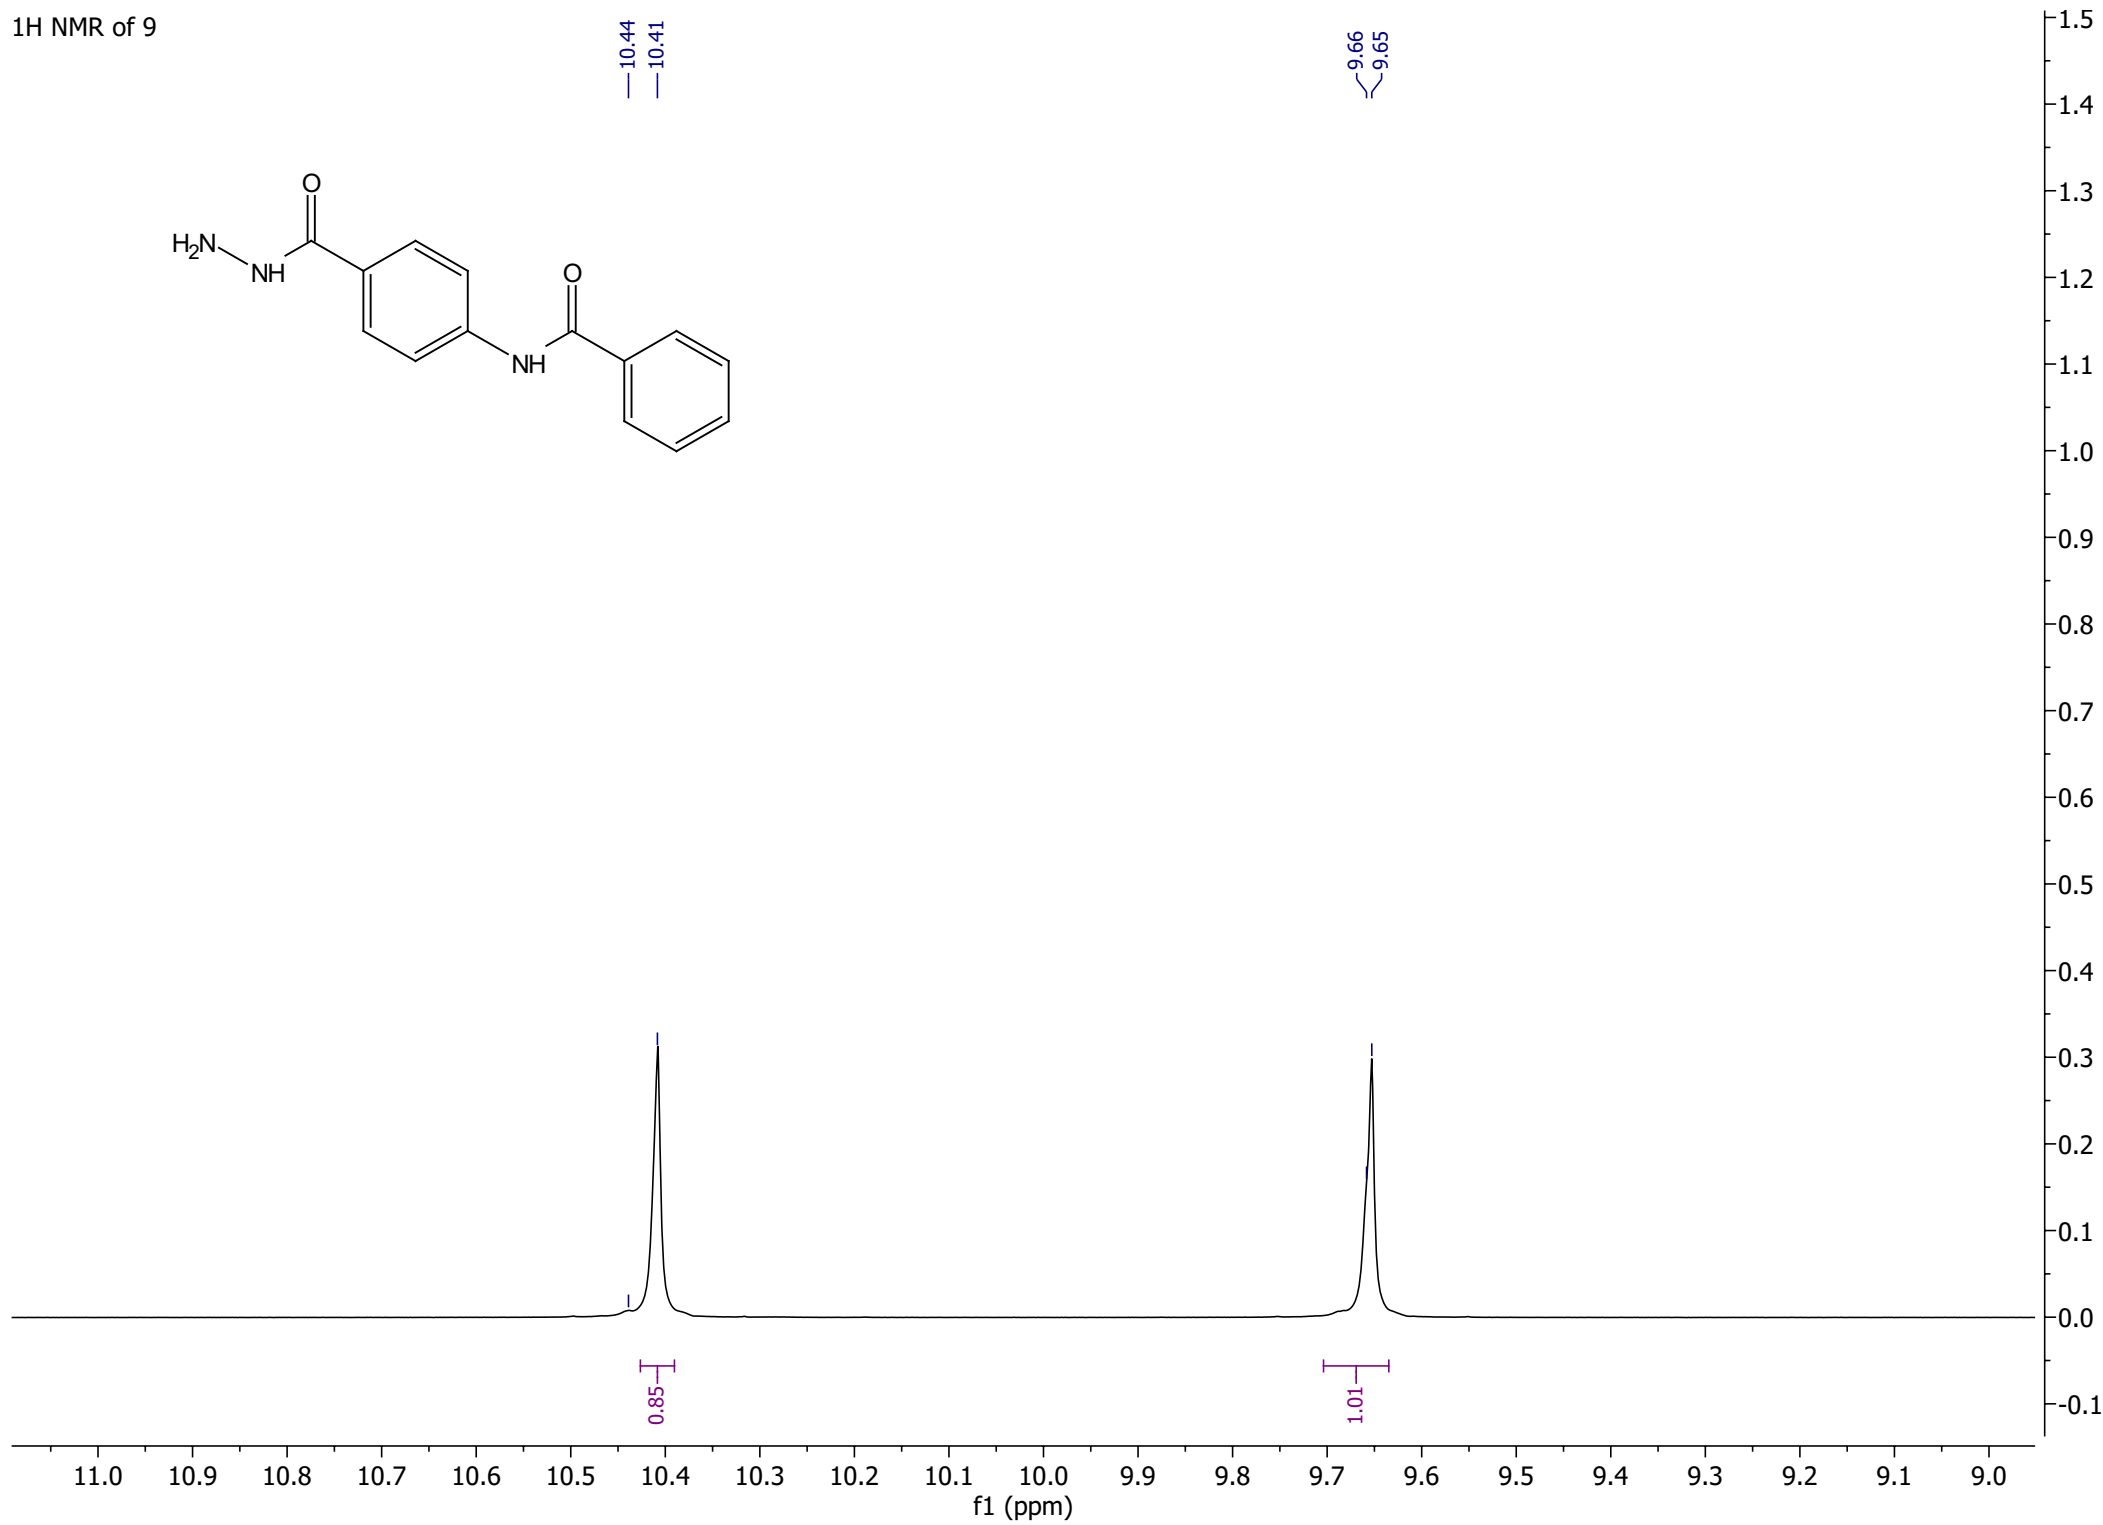



<sup>13</sup>C NMR of 9

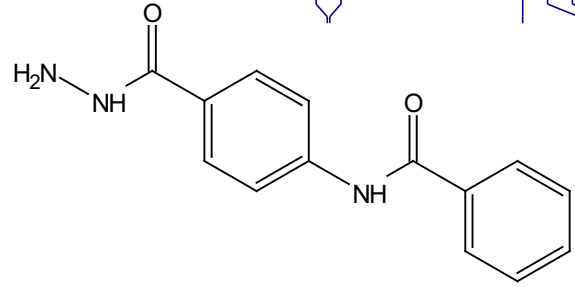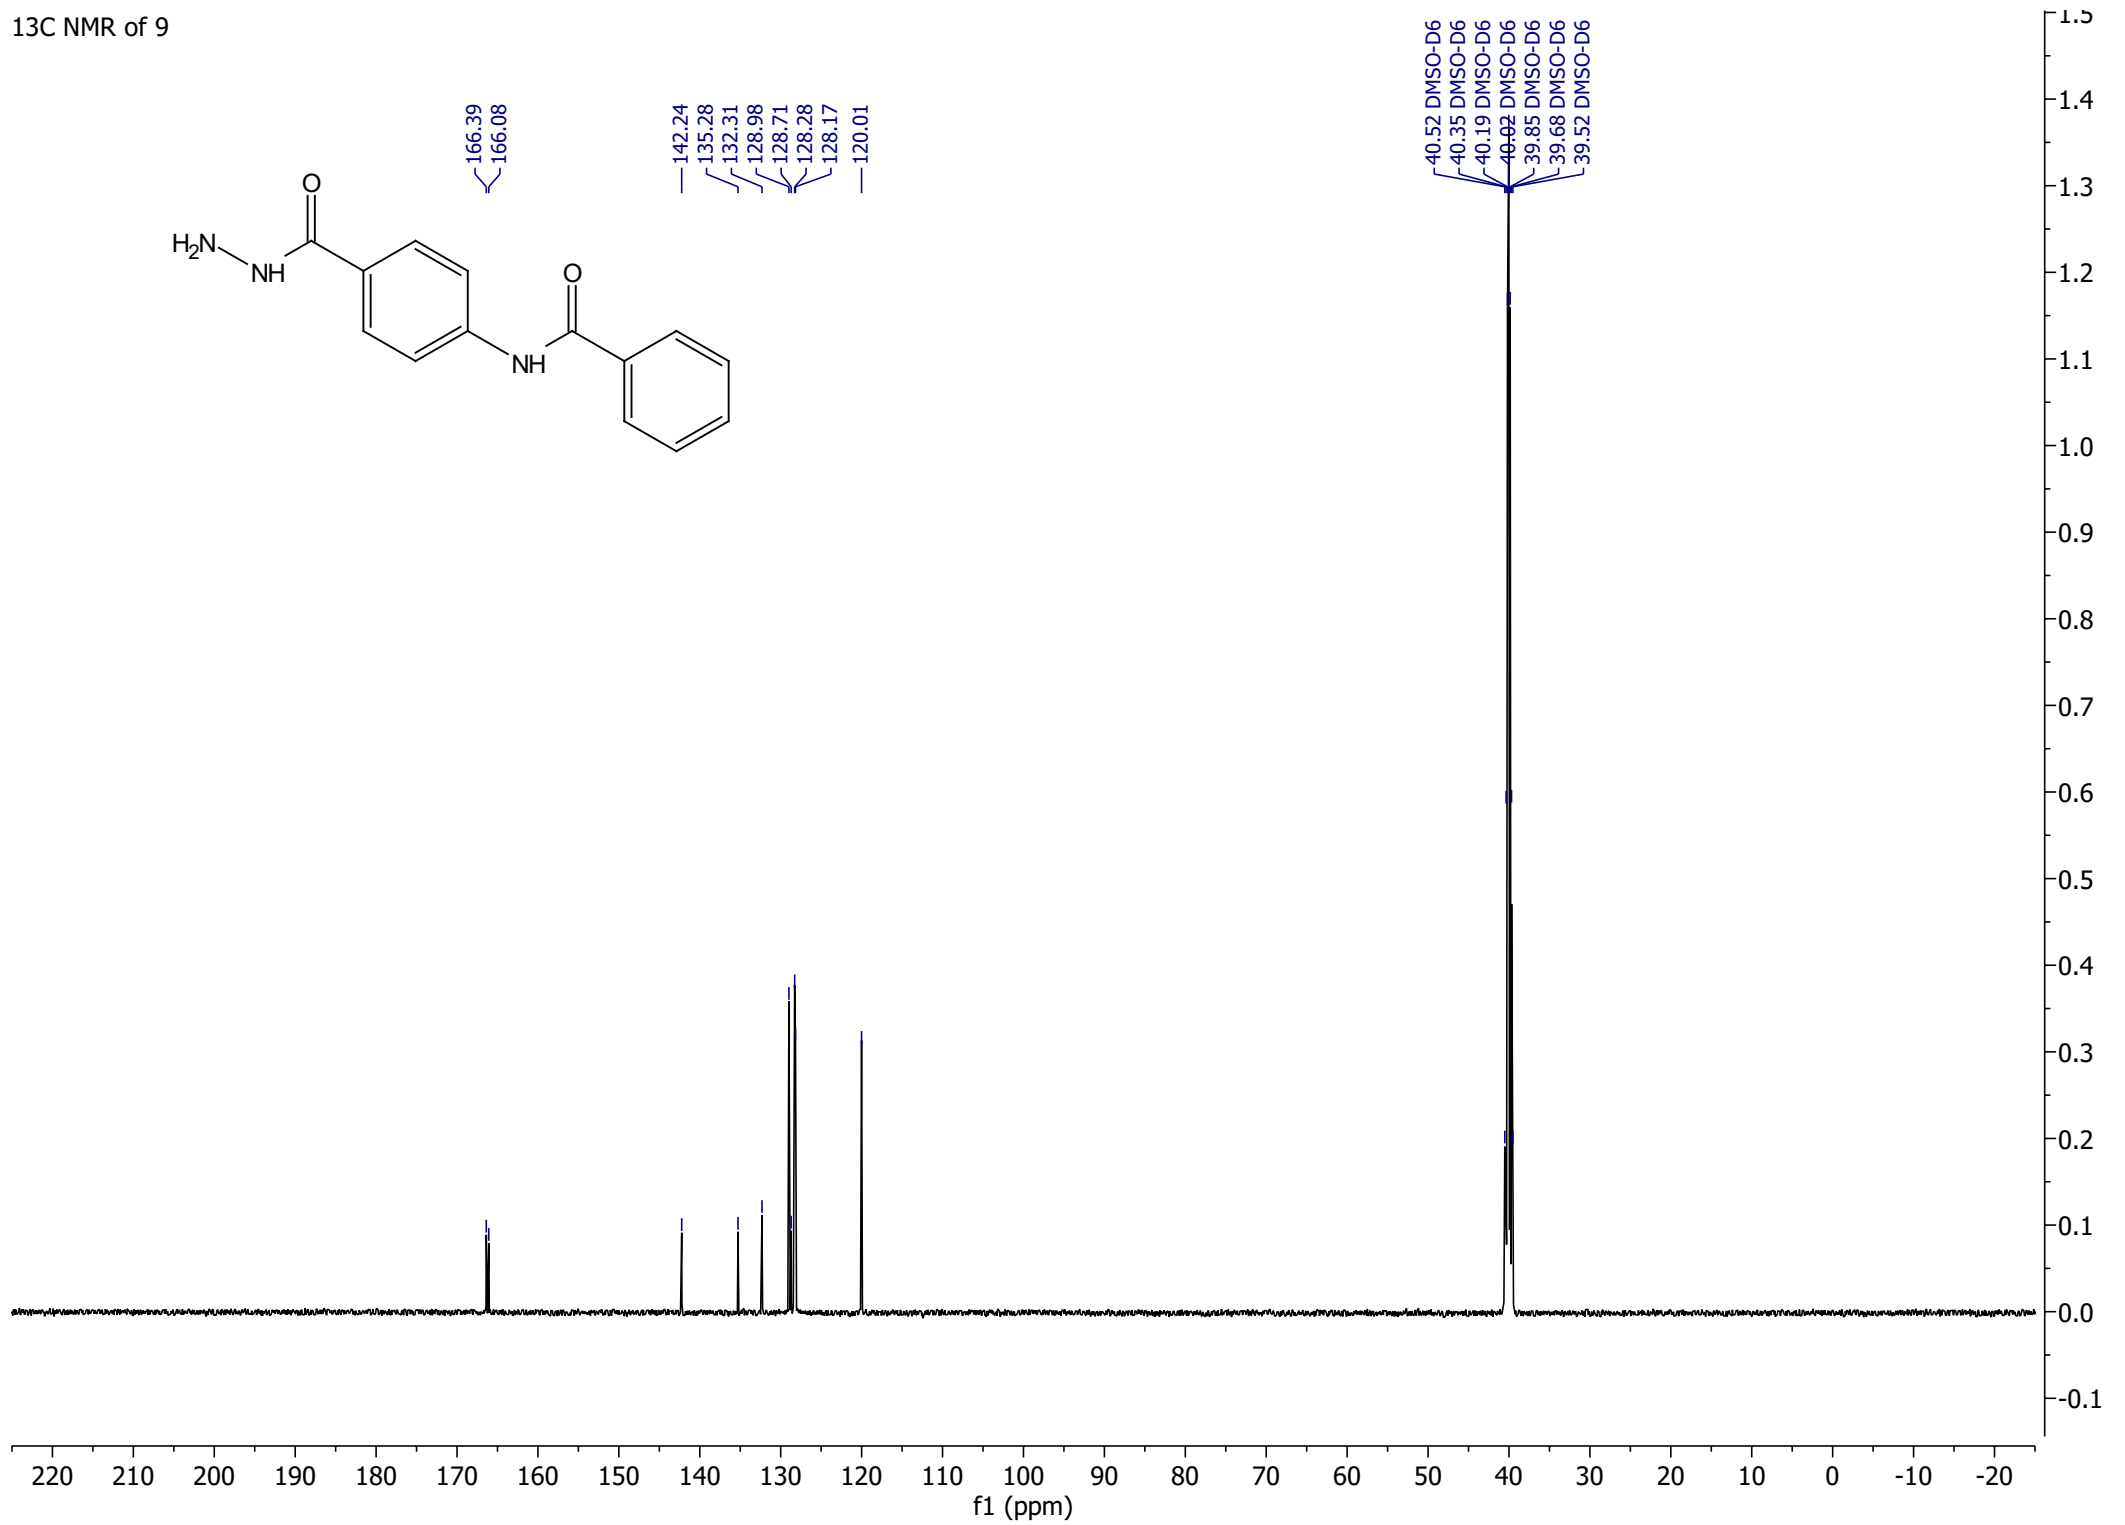

<sup>13</sup>C NMR of 9

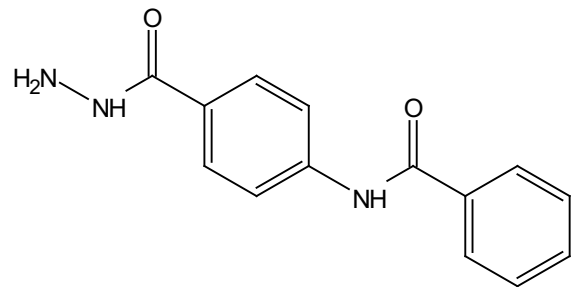

128.98  
128.71  
128.28  
128.17

120.01

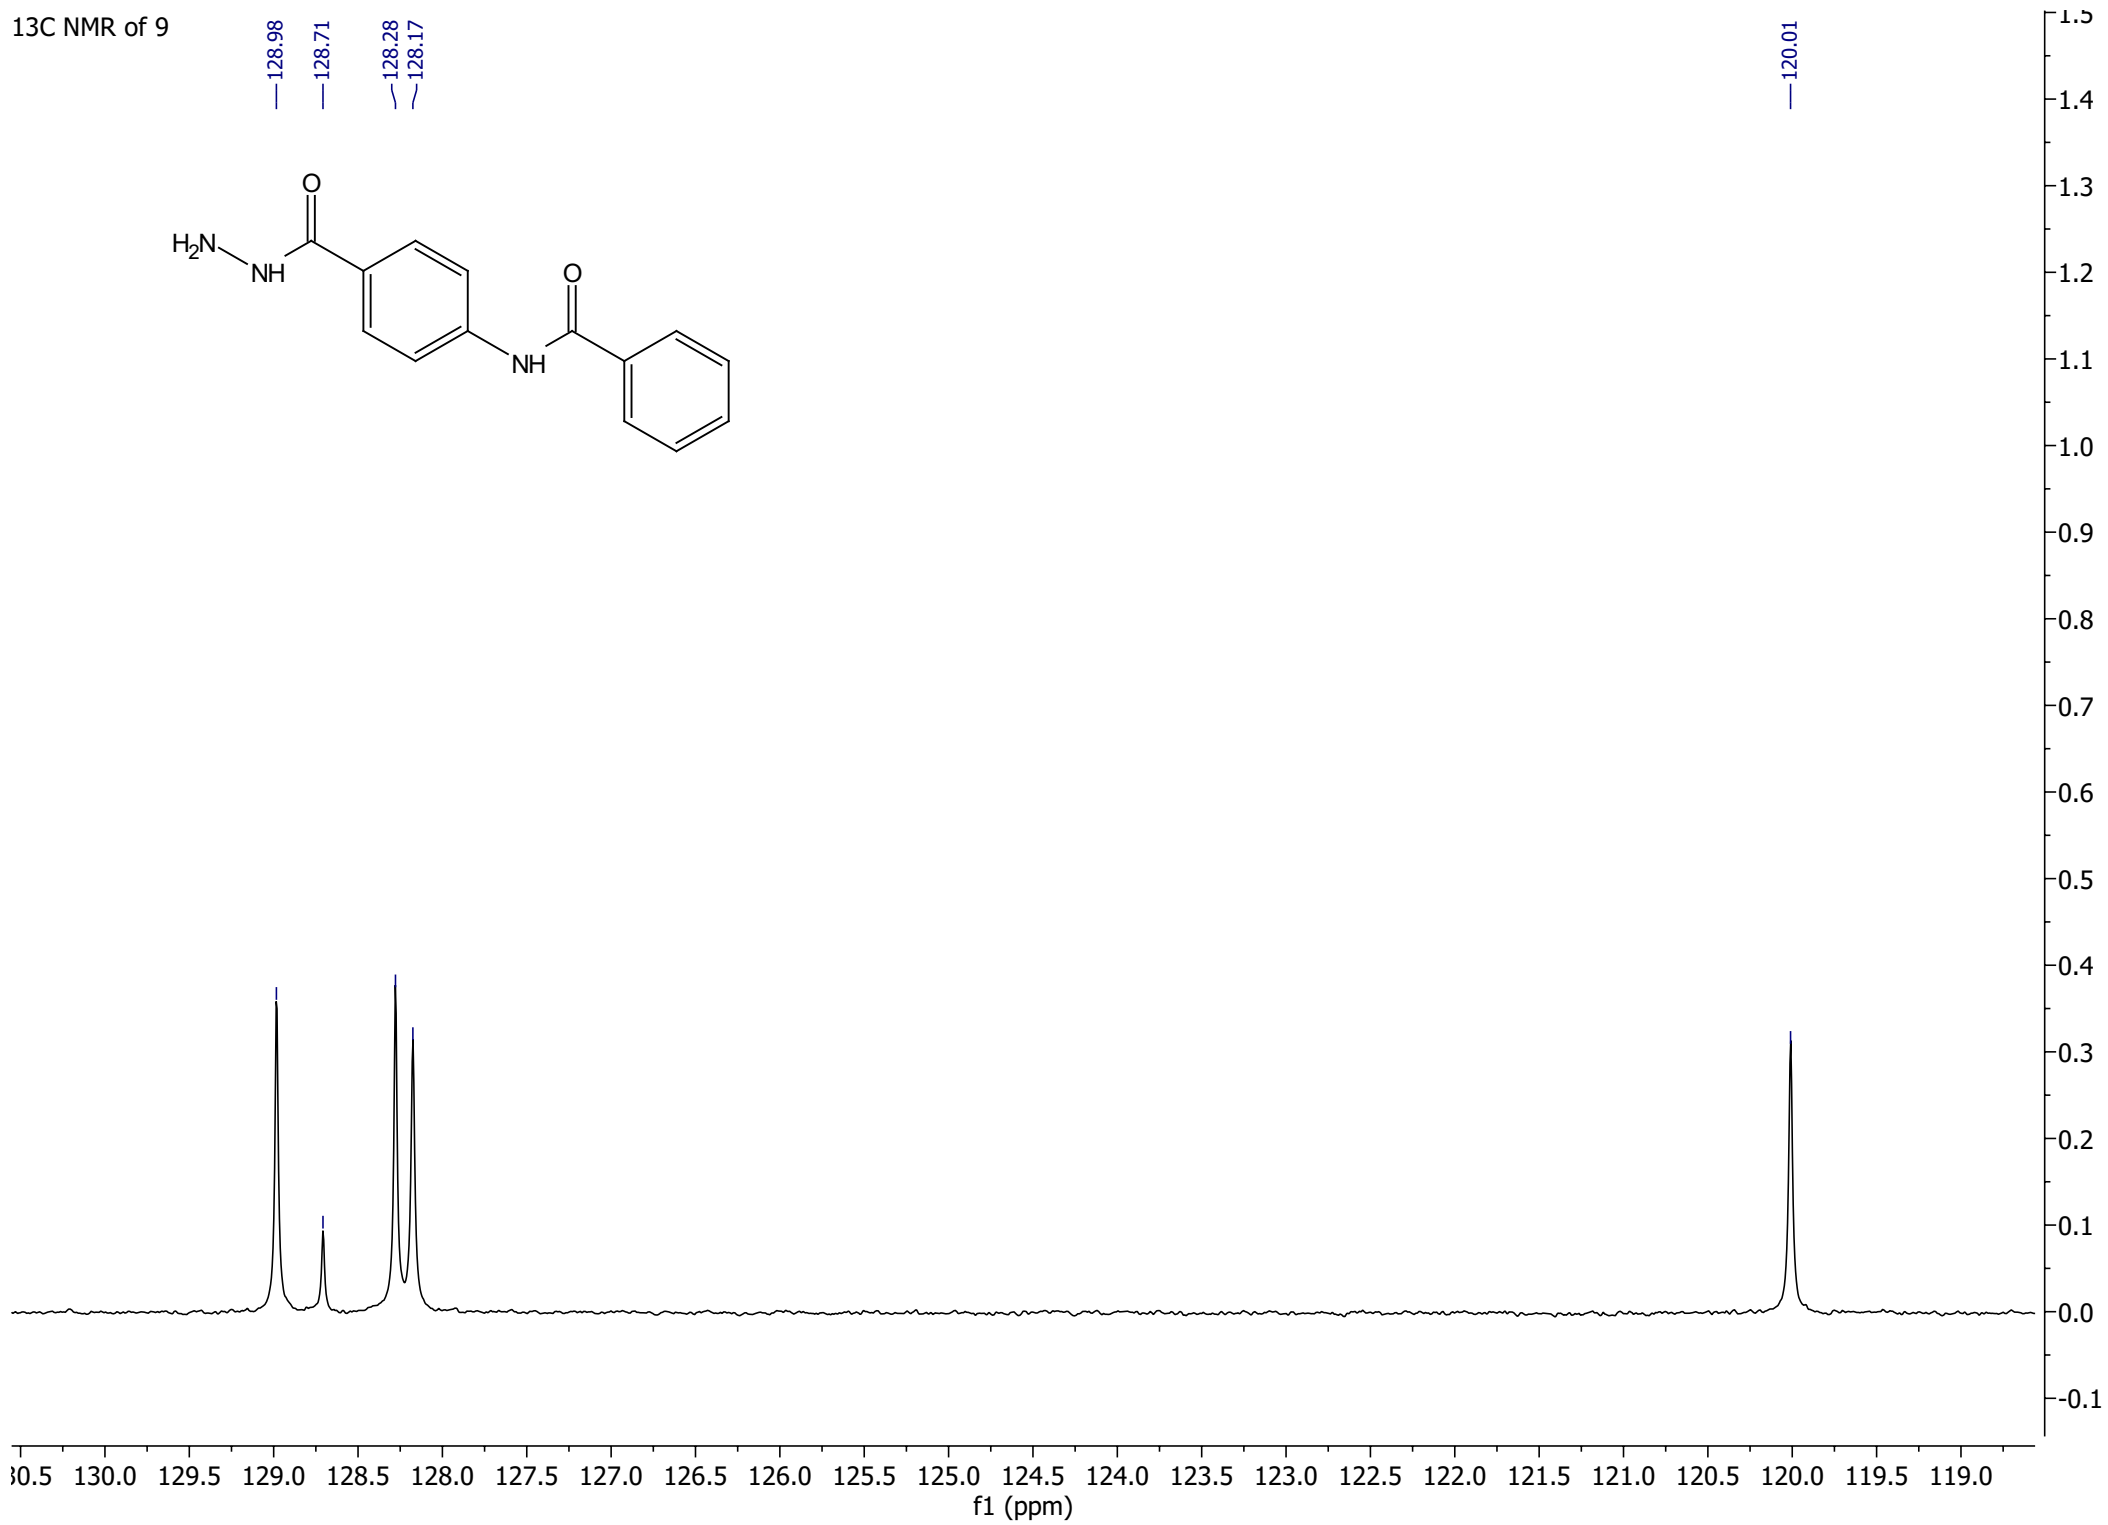

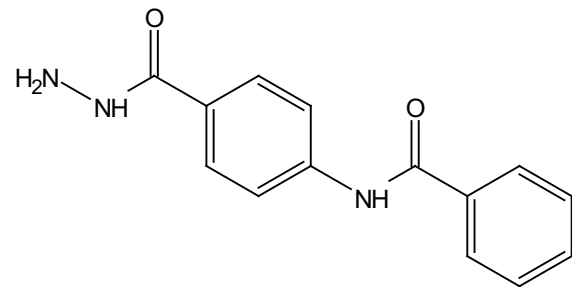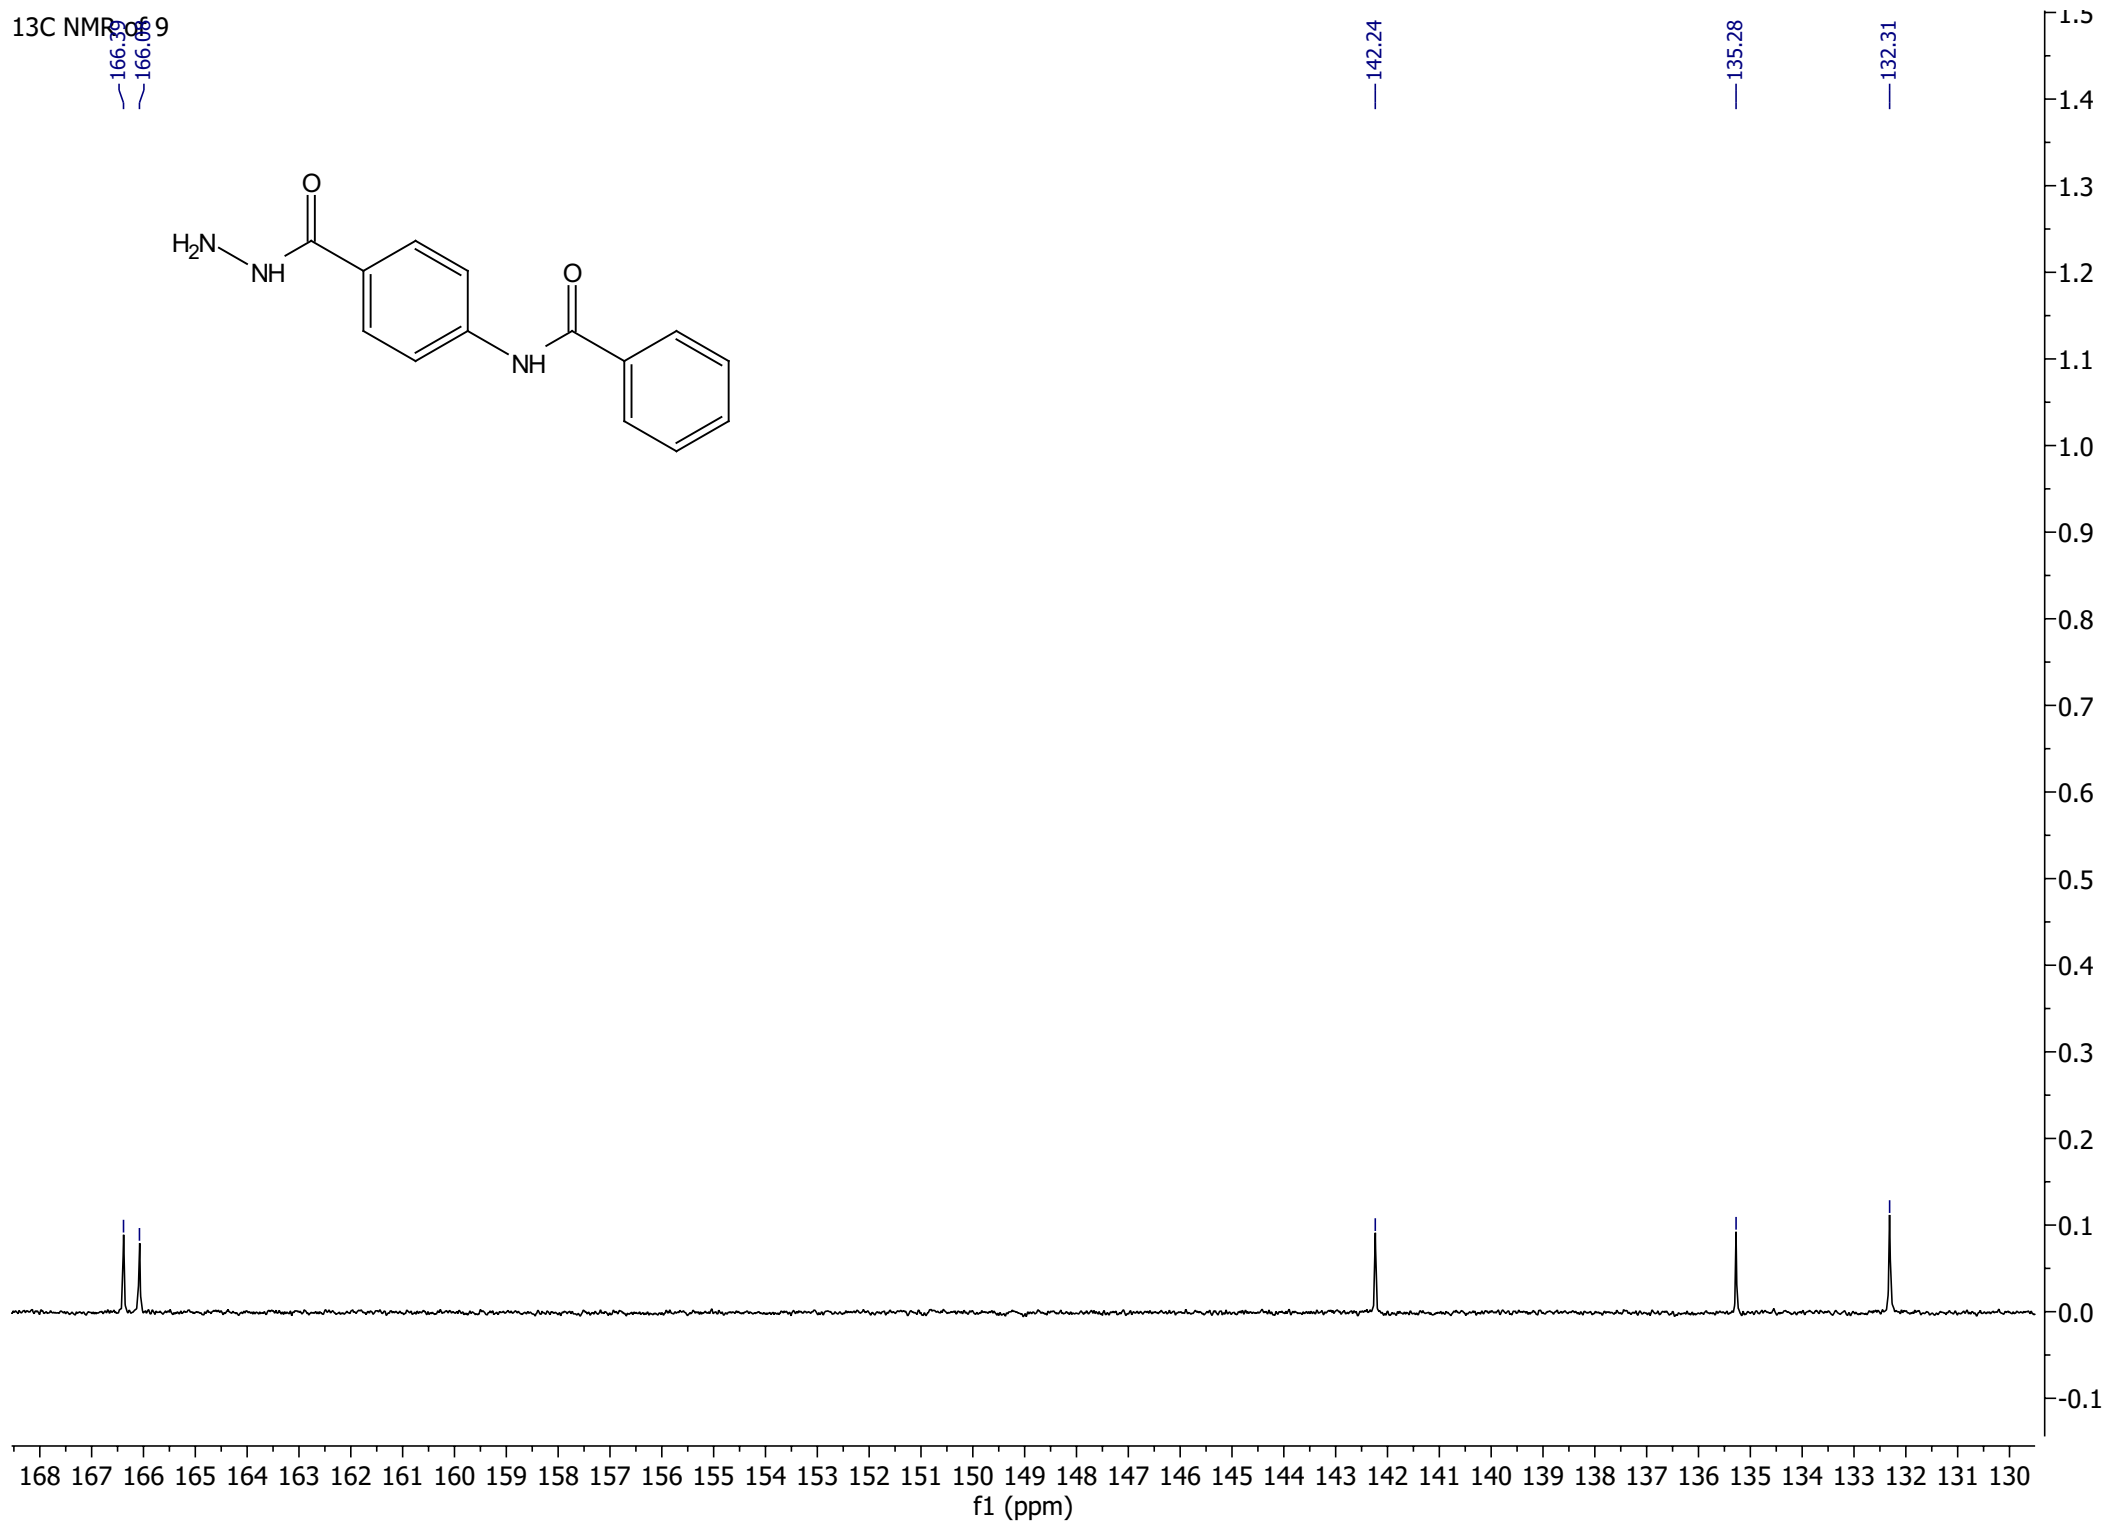

1H NMR of Q4

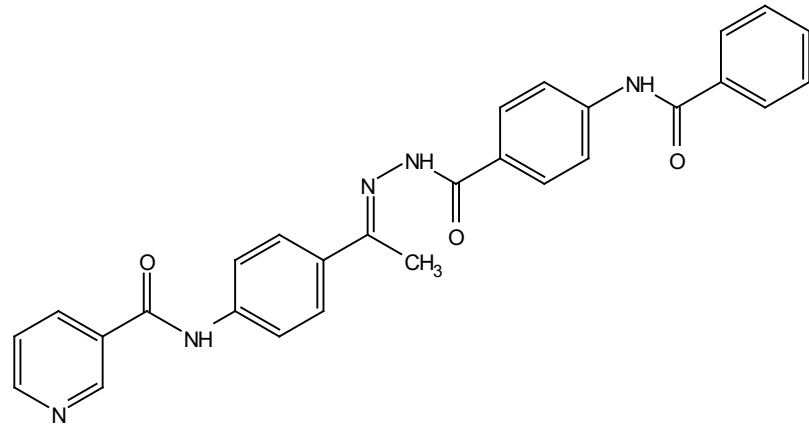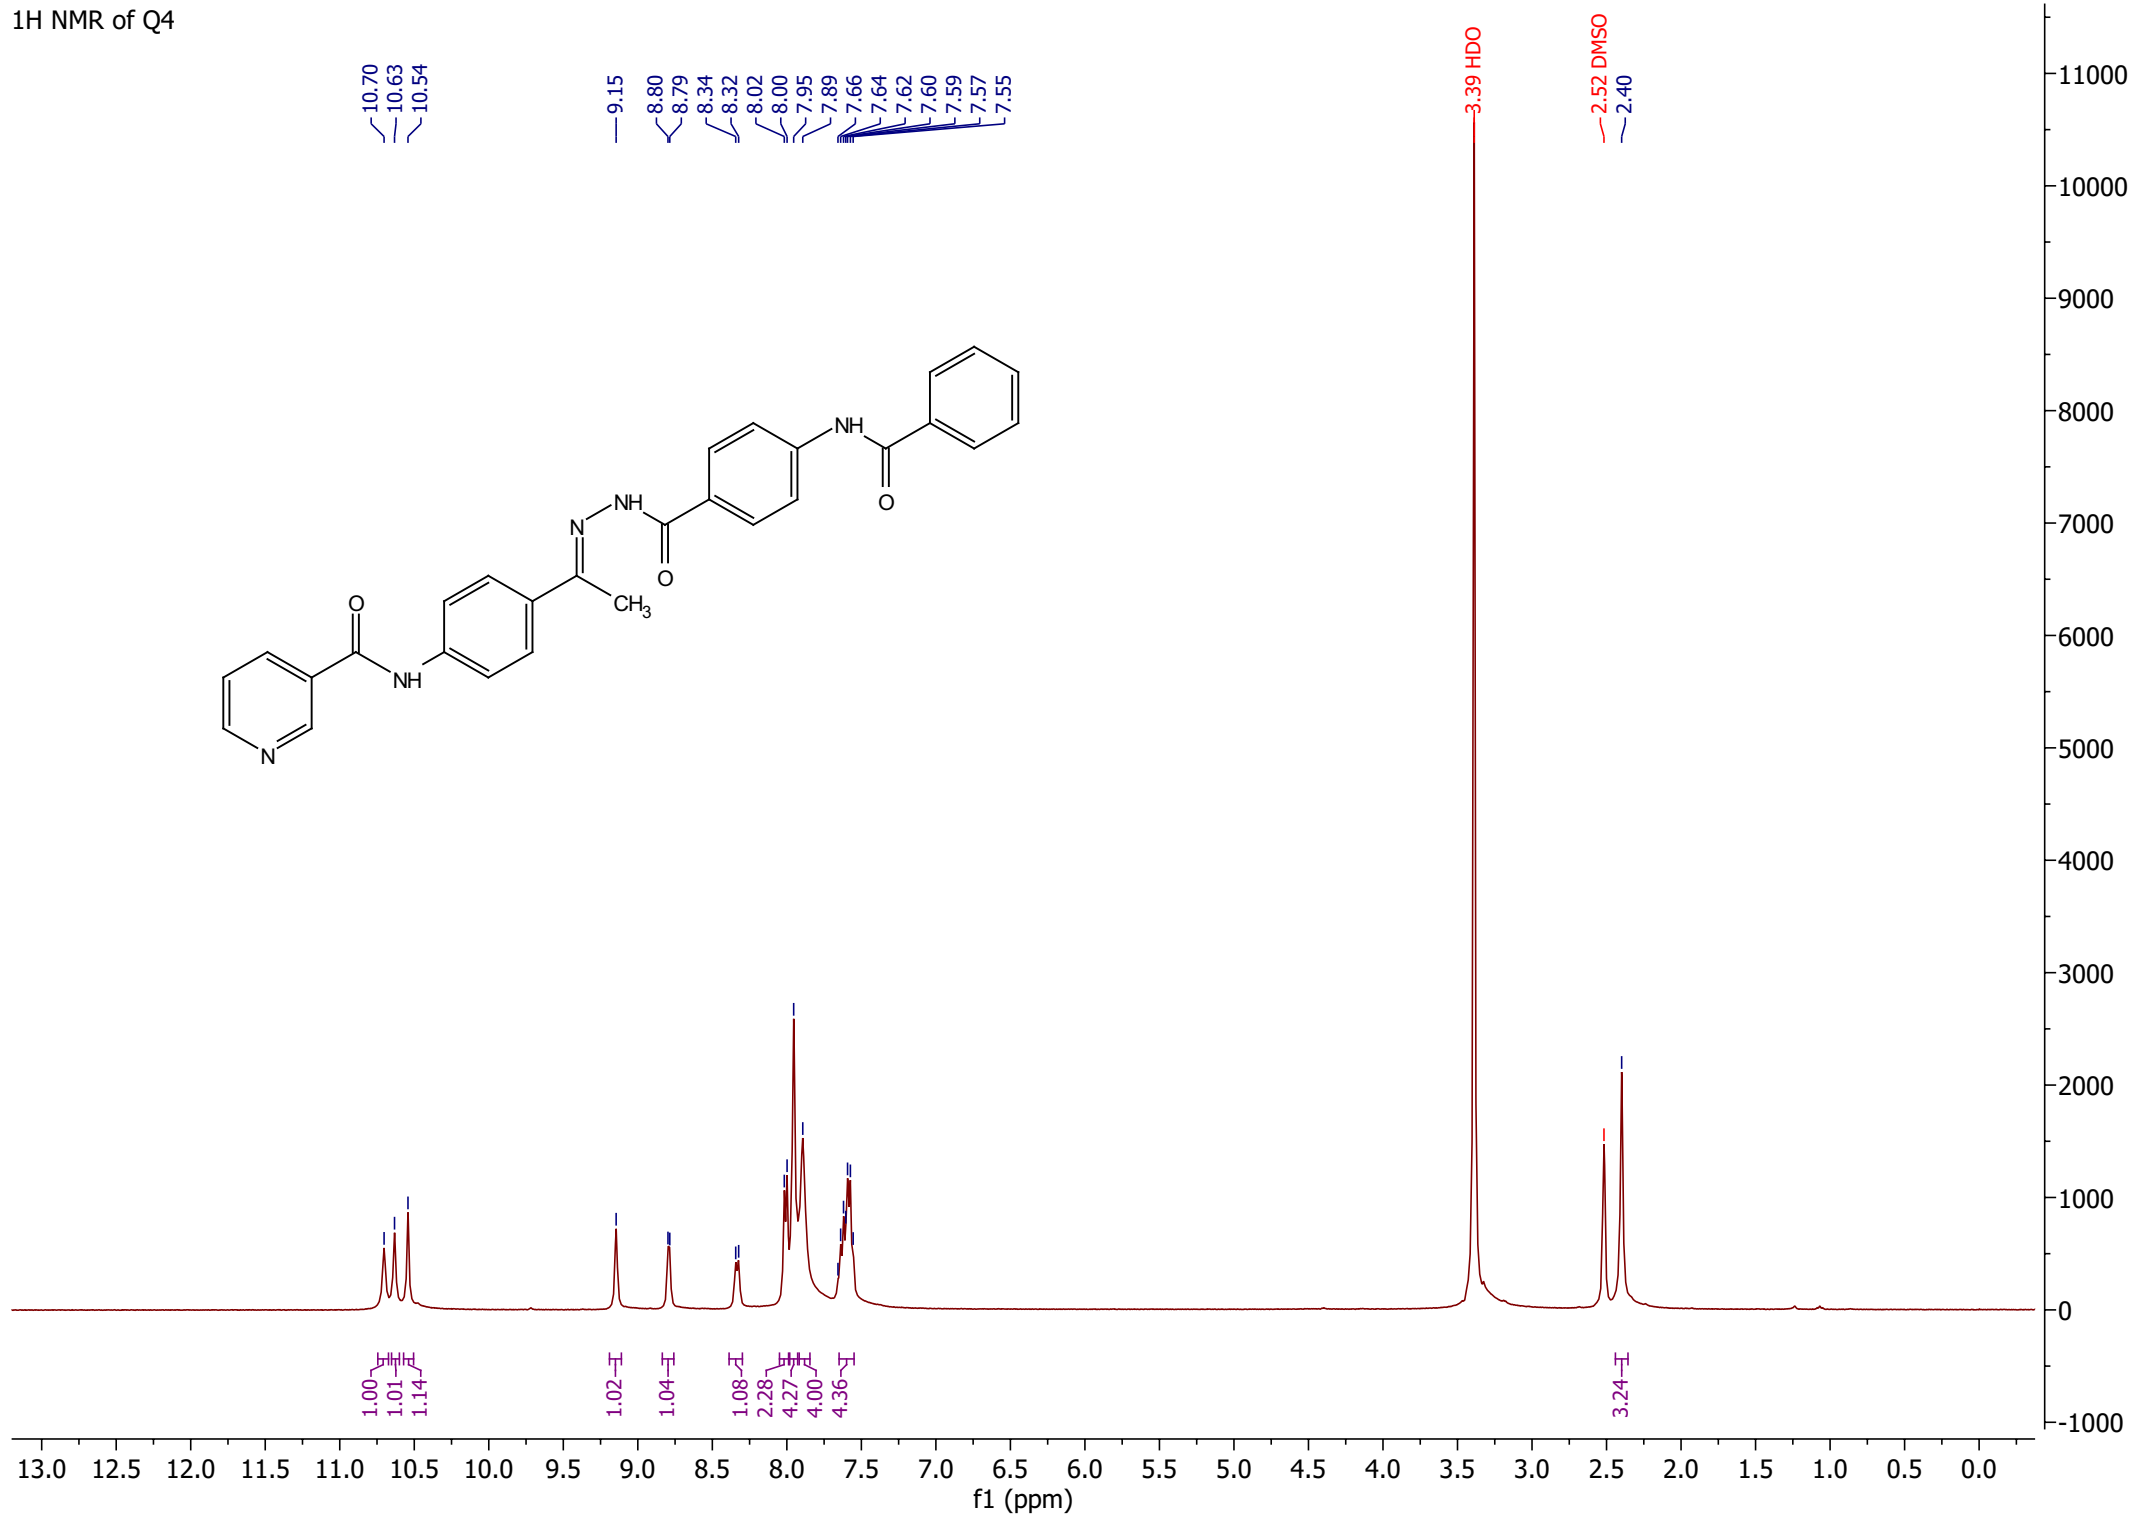

1H NMR of Q4

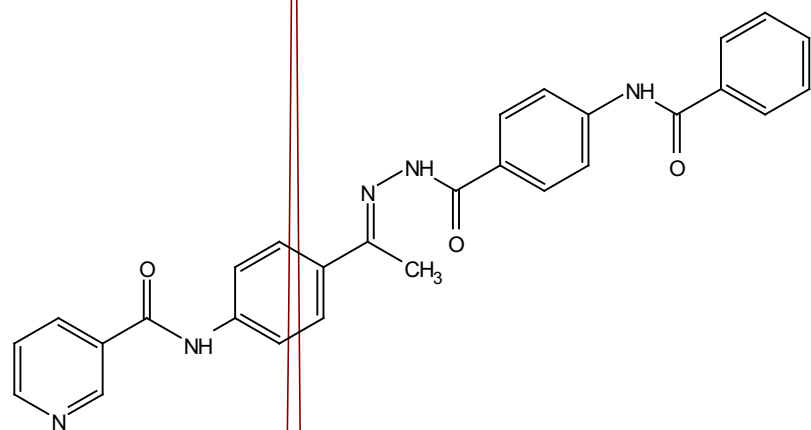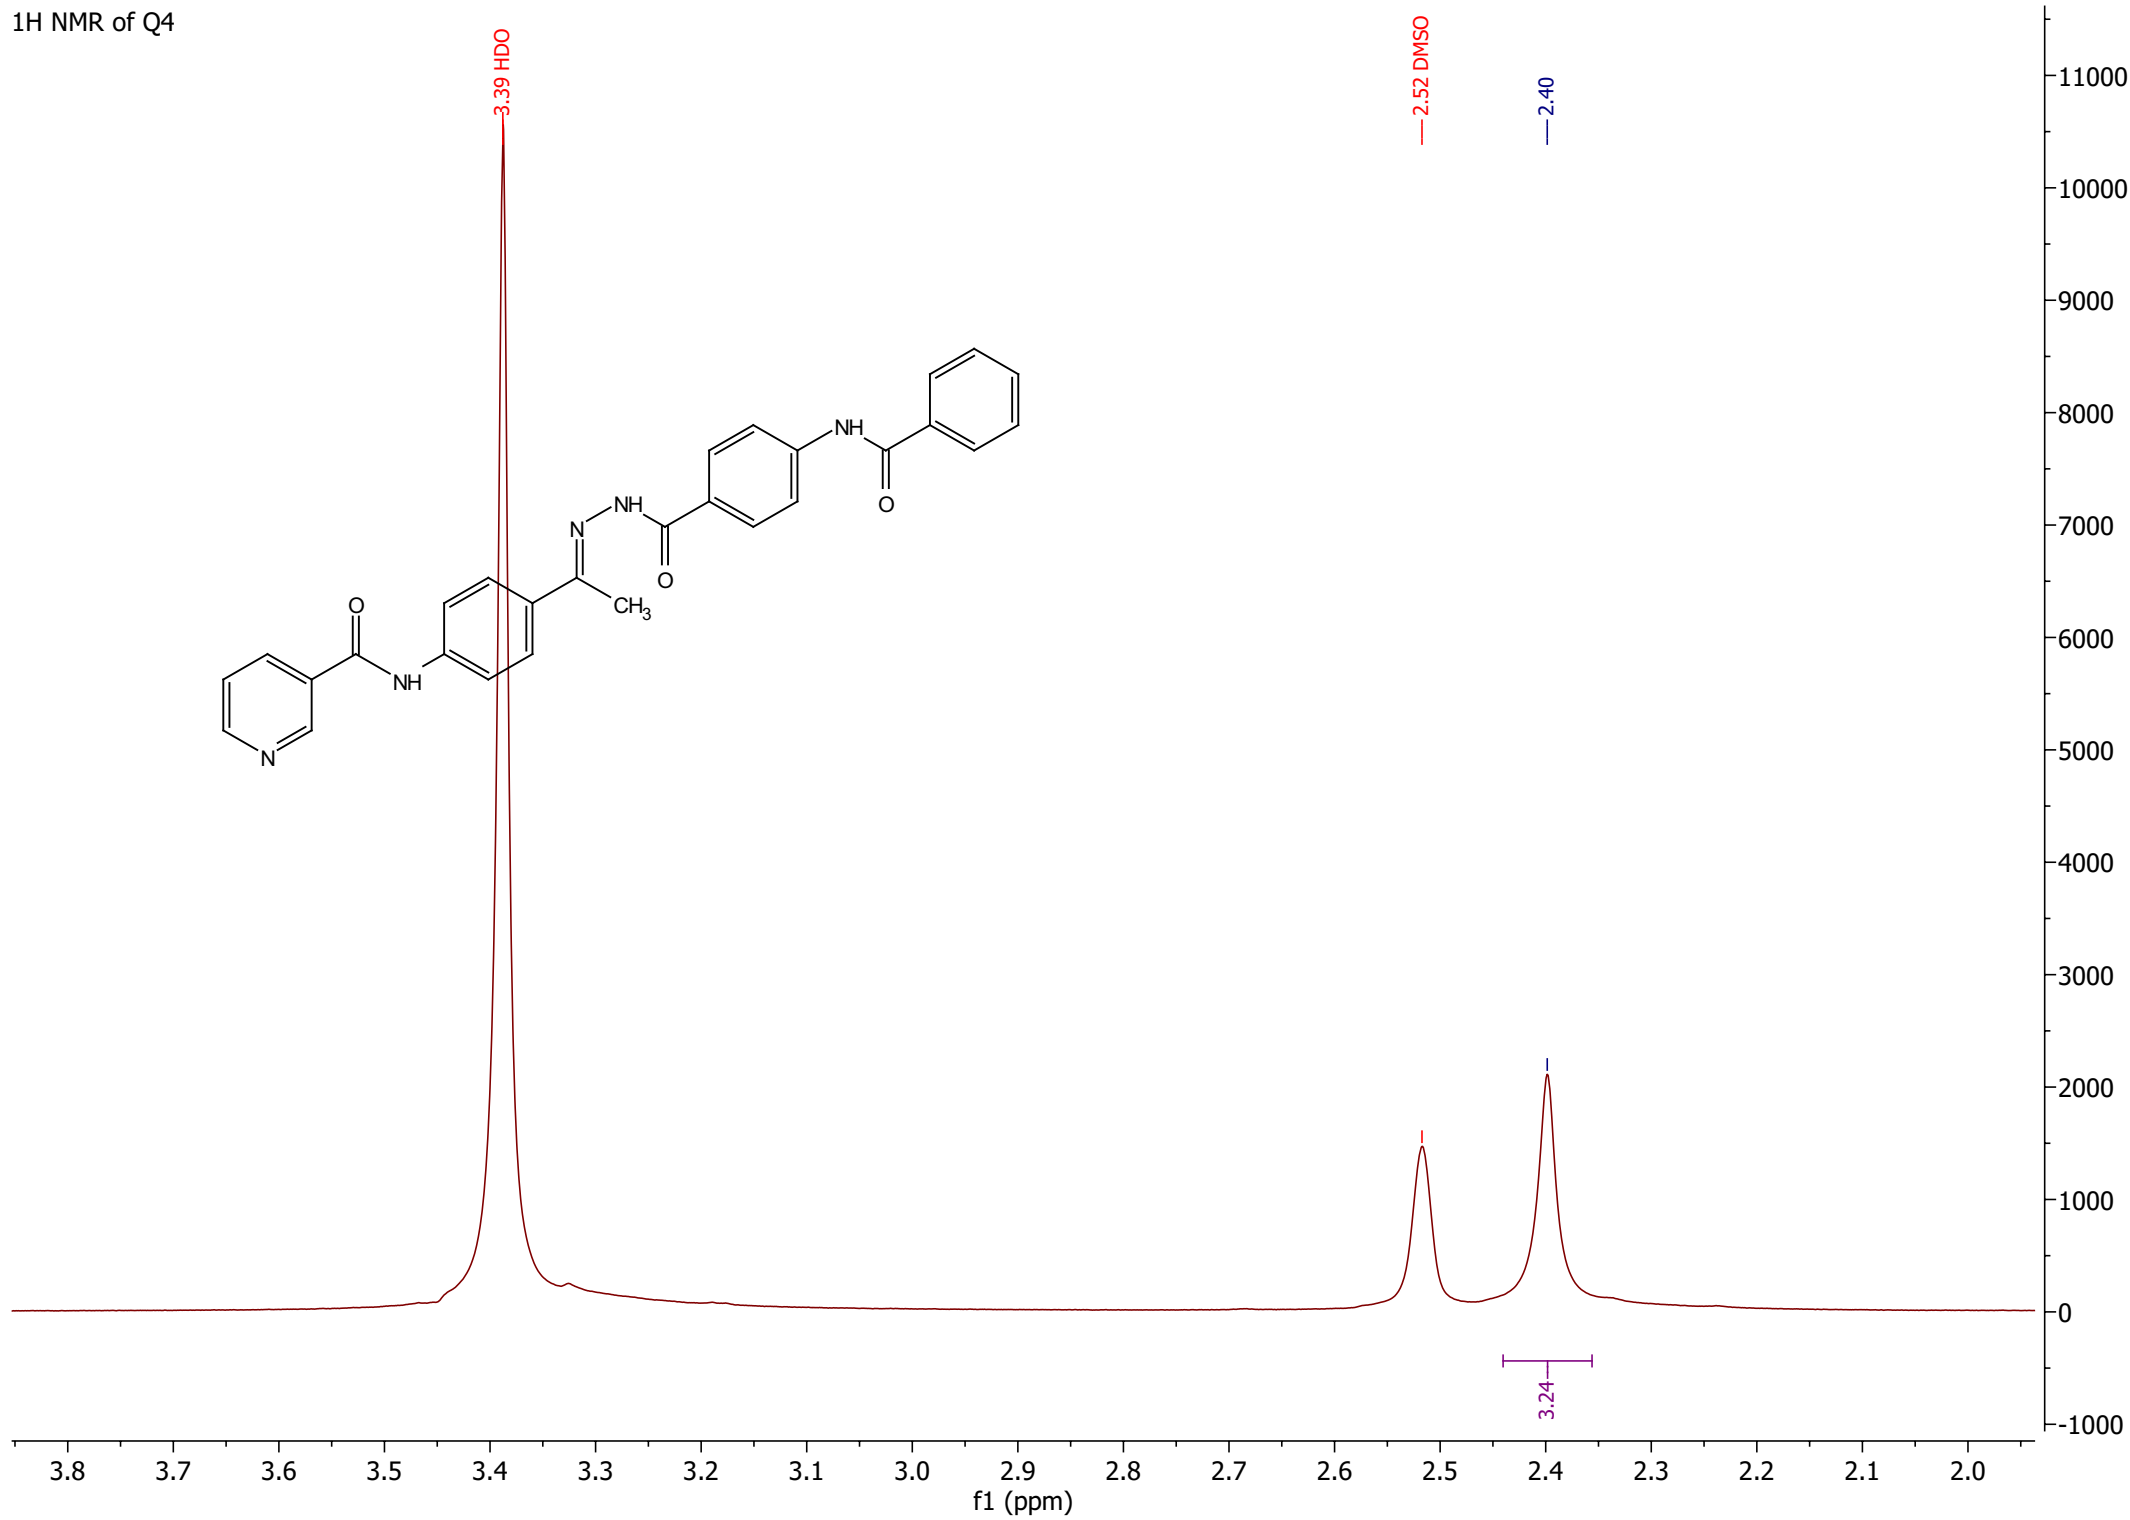

1H NMR of Q4

9.15  
8.80  
8.79  
8.34  
8.32  
8.02  
8.00  
7.95  
7.89  
7.66  
7.64  
7.62  
7.60  
7.59  
7.57  
7.55

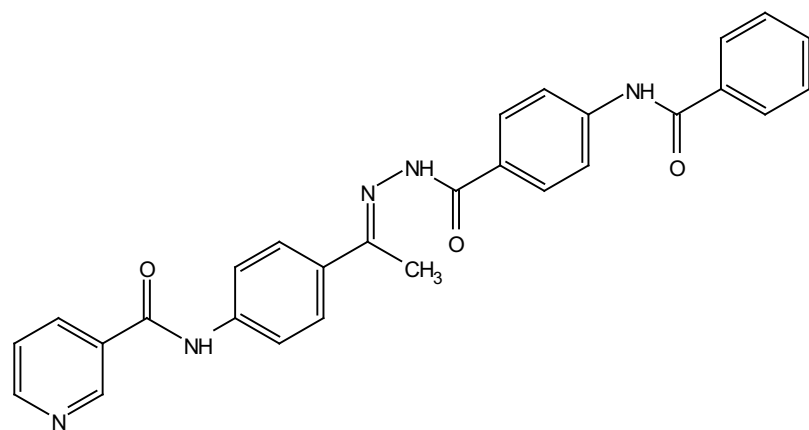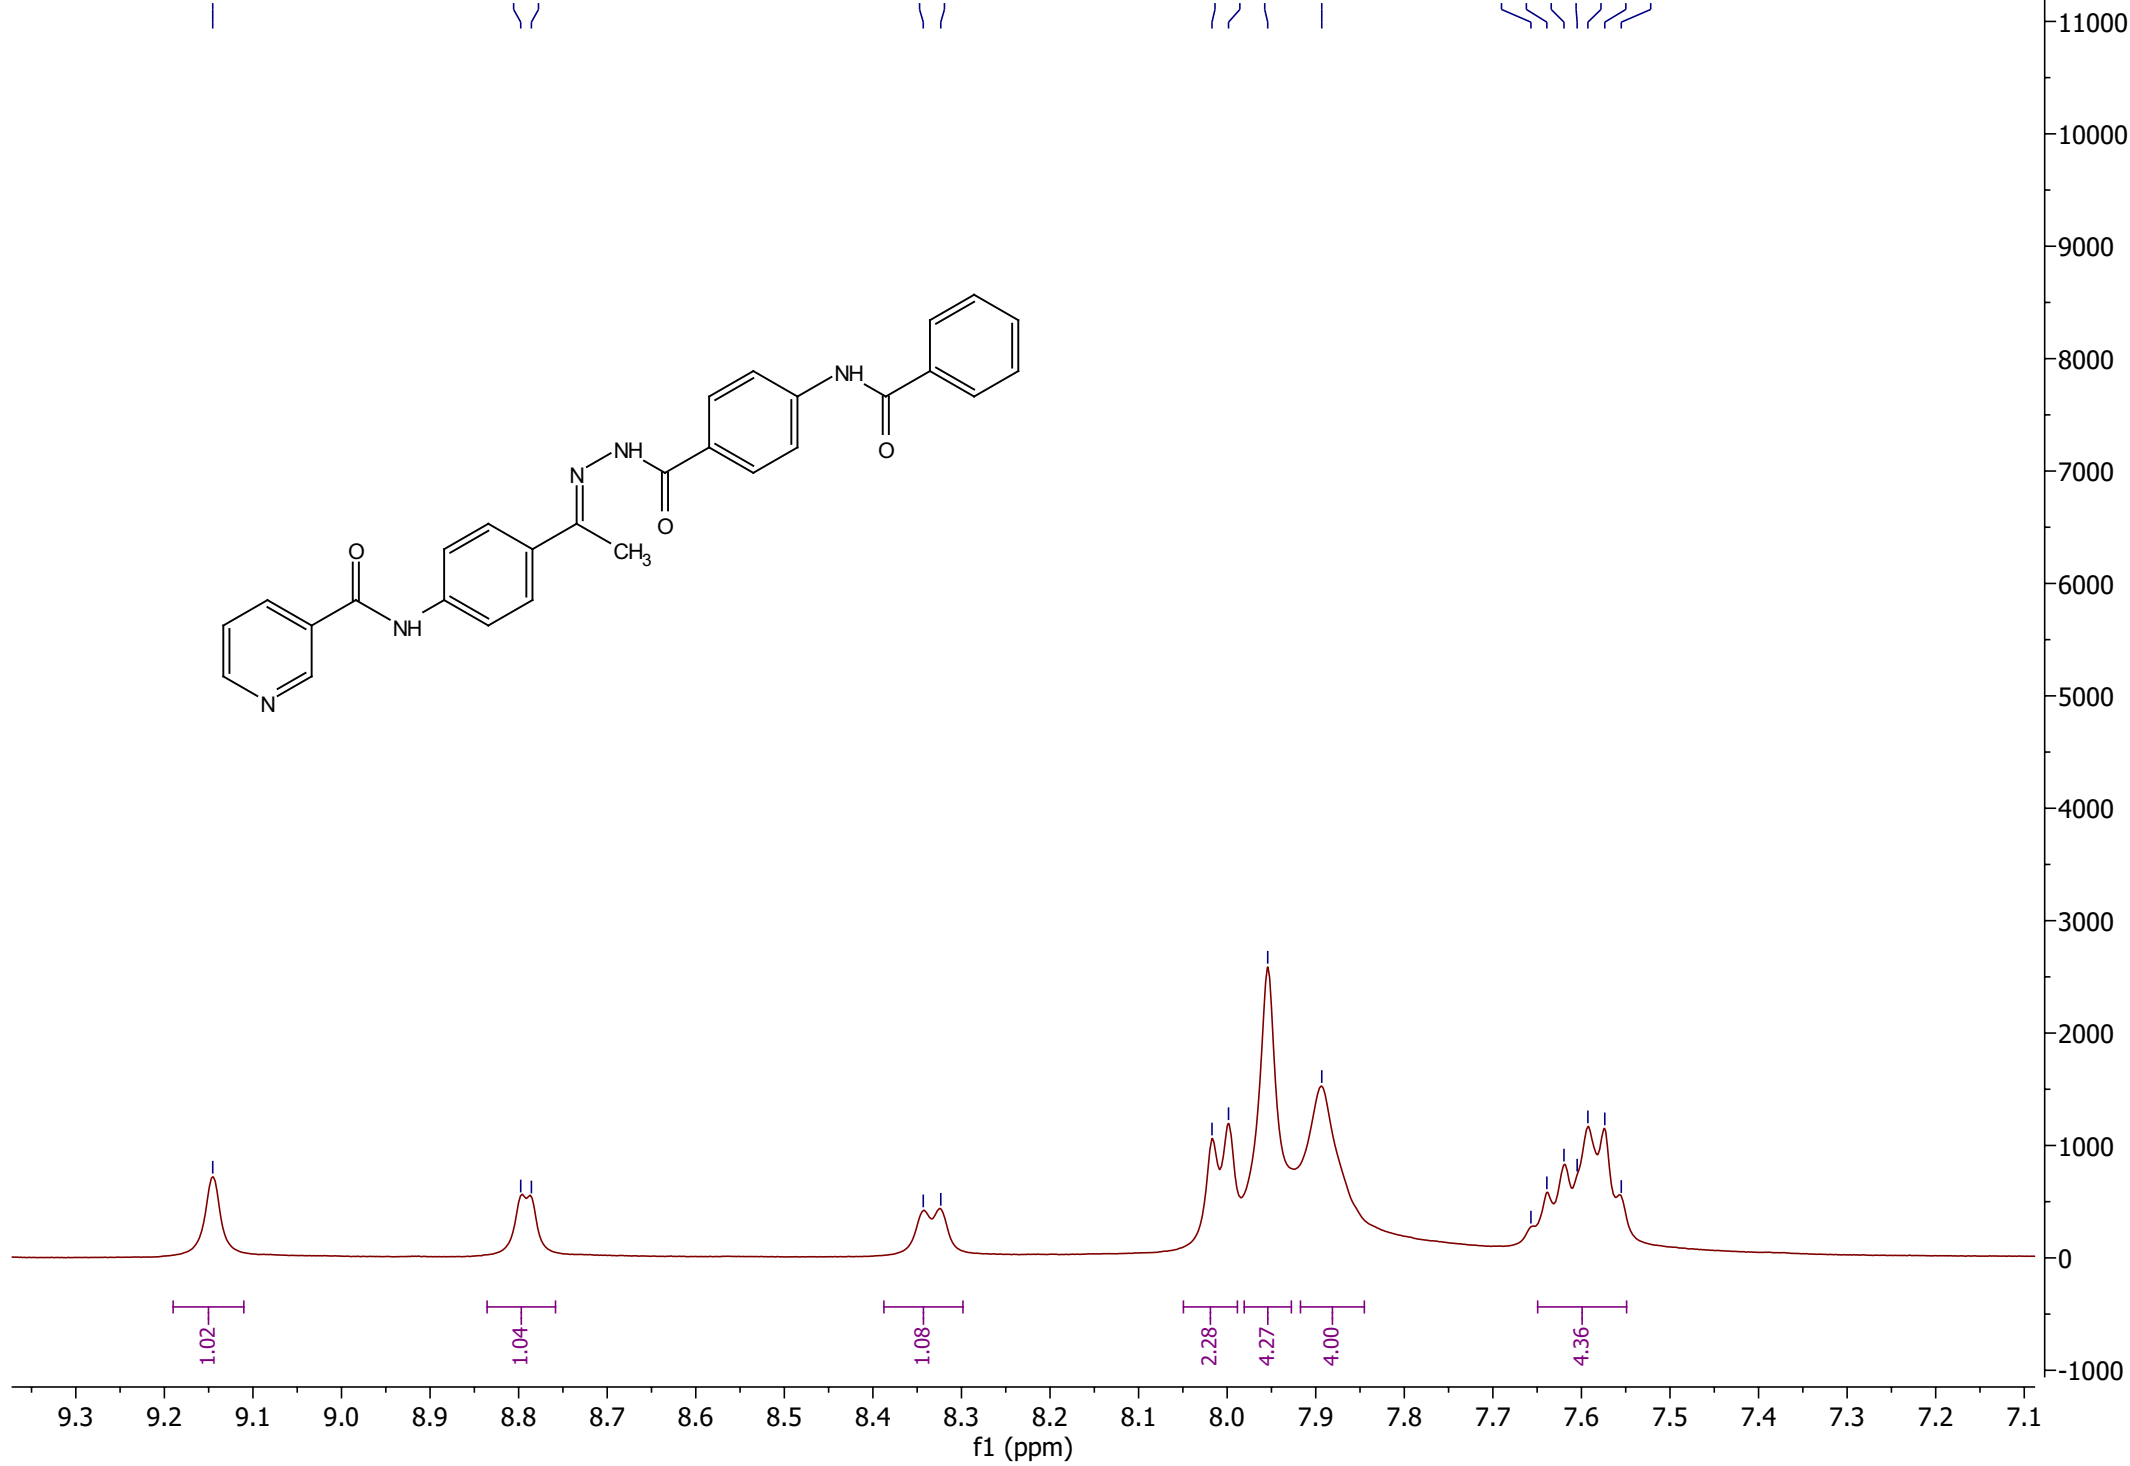

1H NMR of Q4

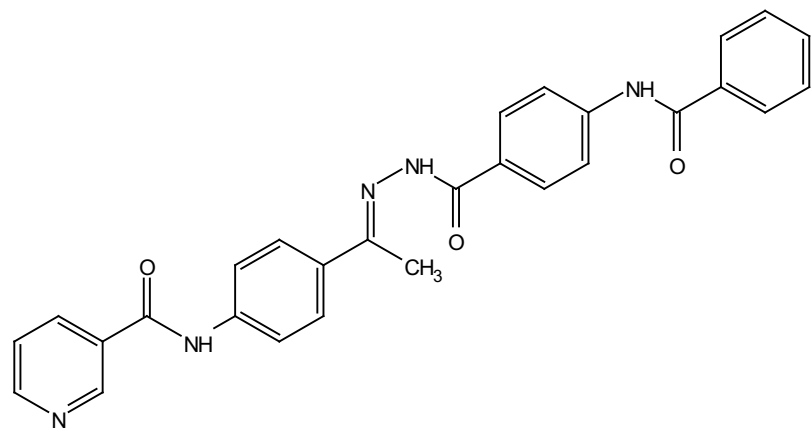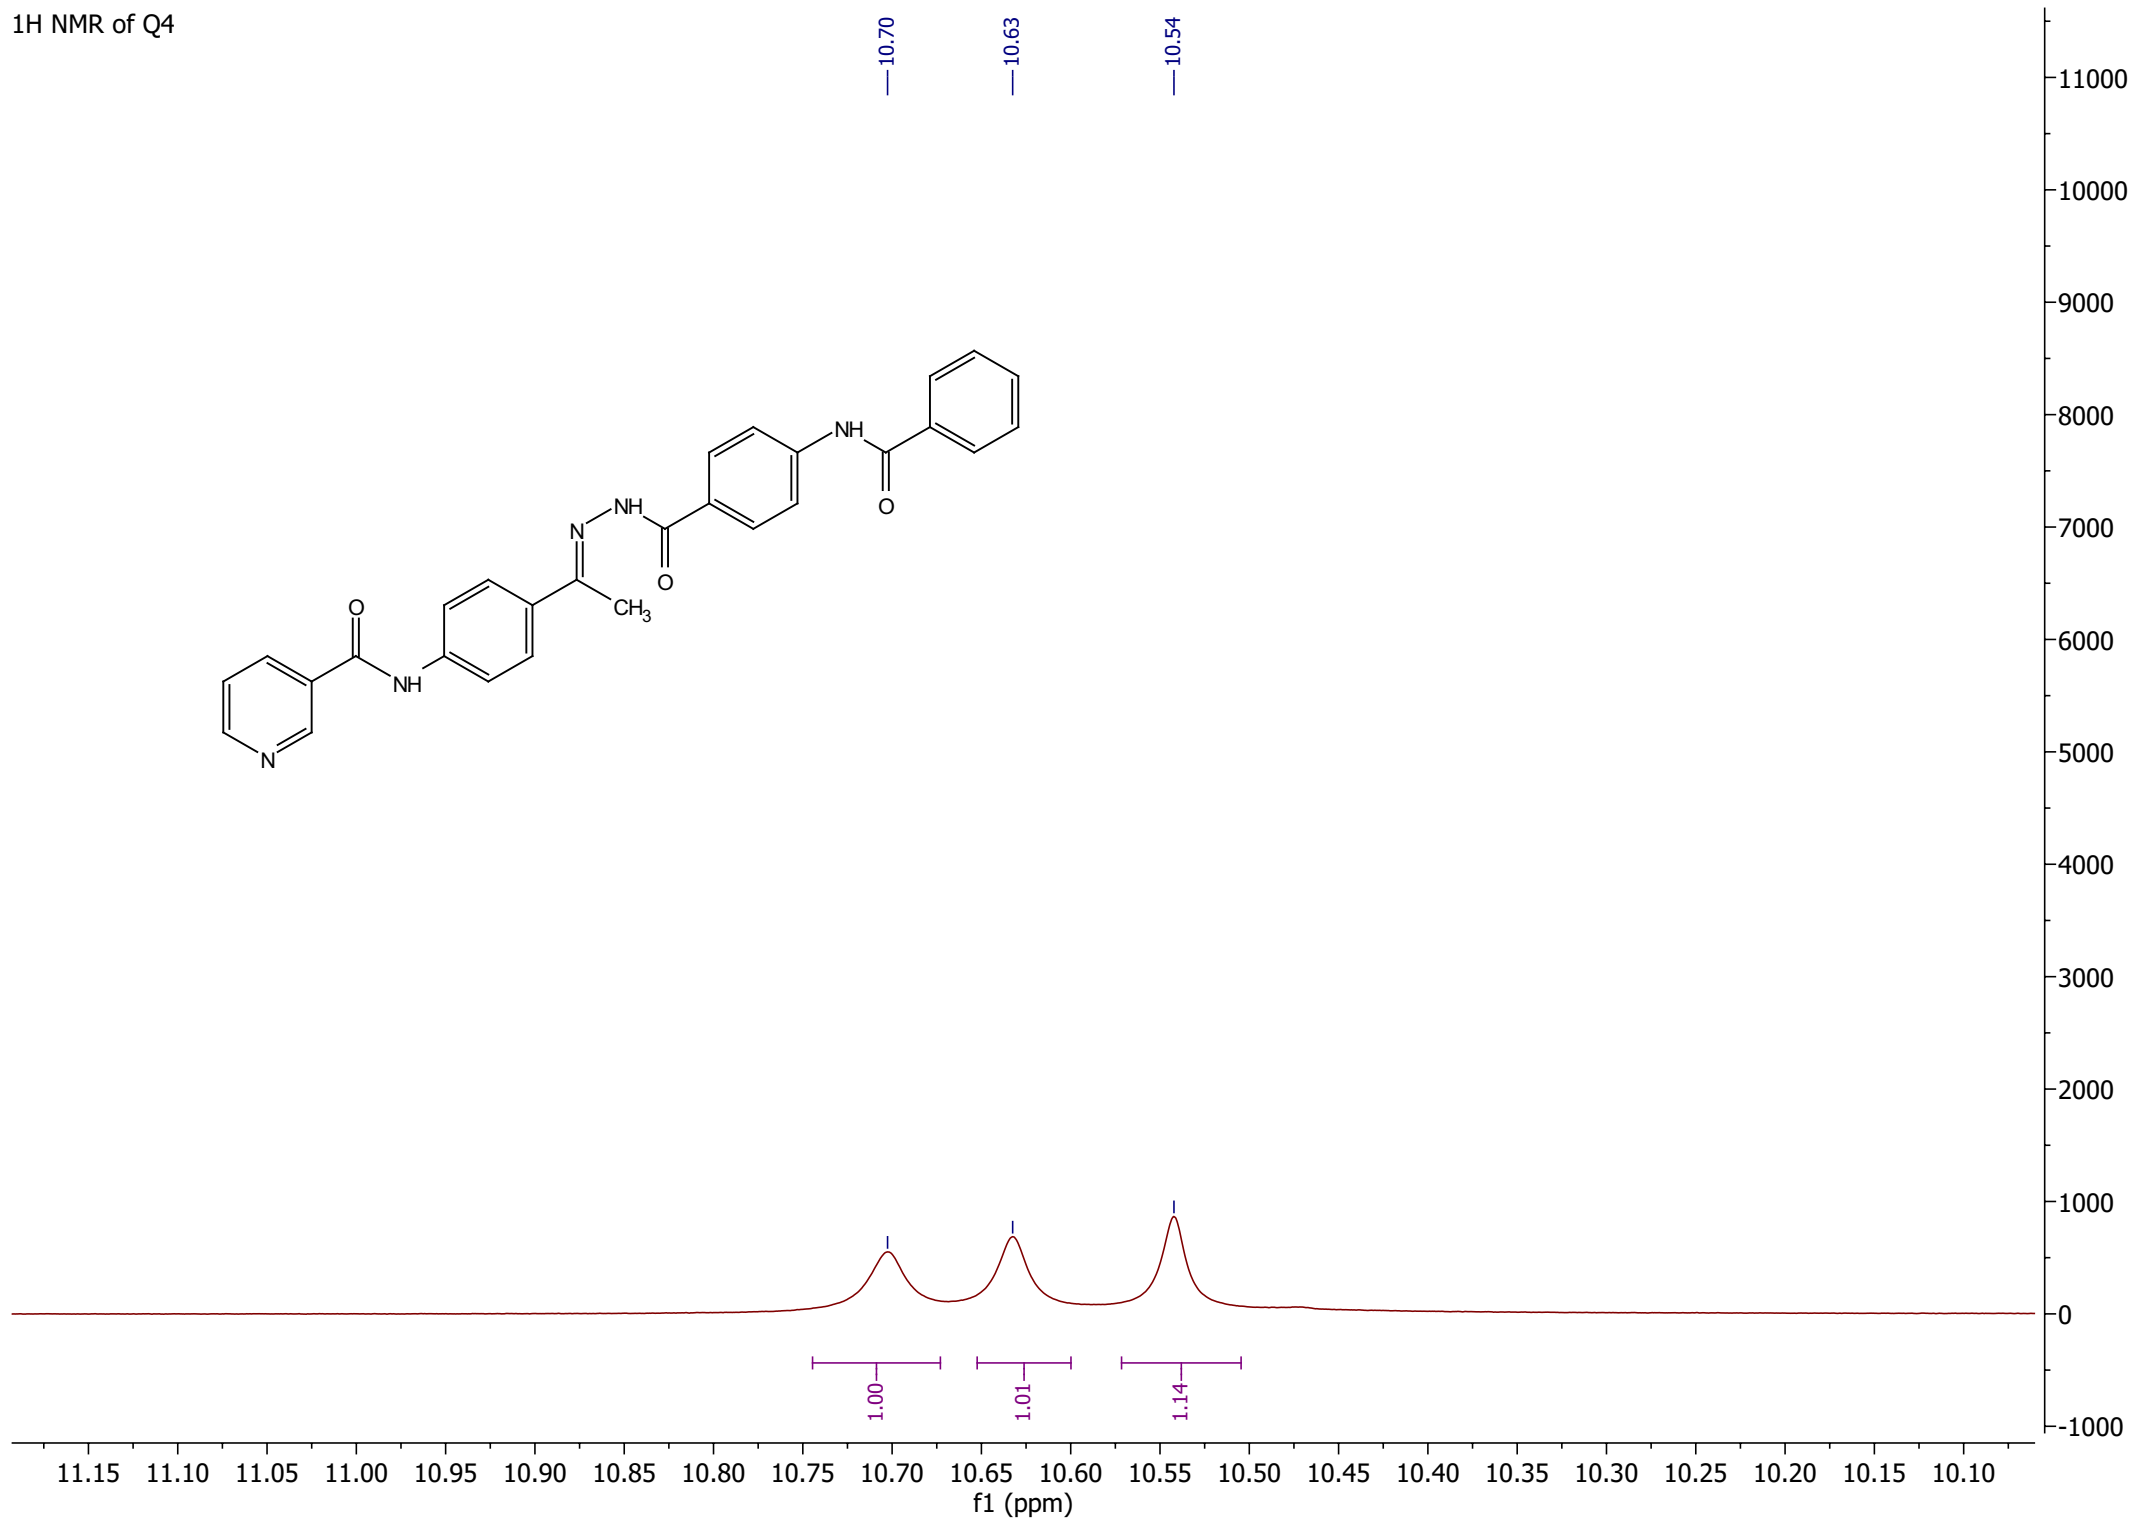

Ibrahim Eissa-Q4-C13-RR.10.fid  
Ibrahim Eissa-Q4-C13-RR

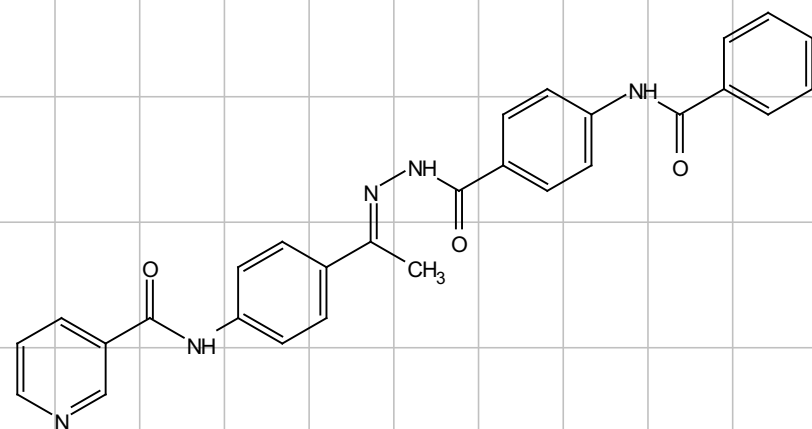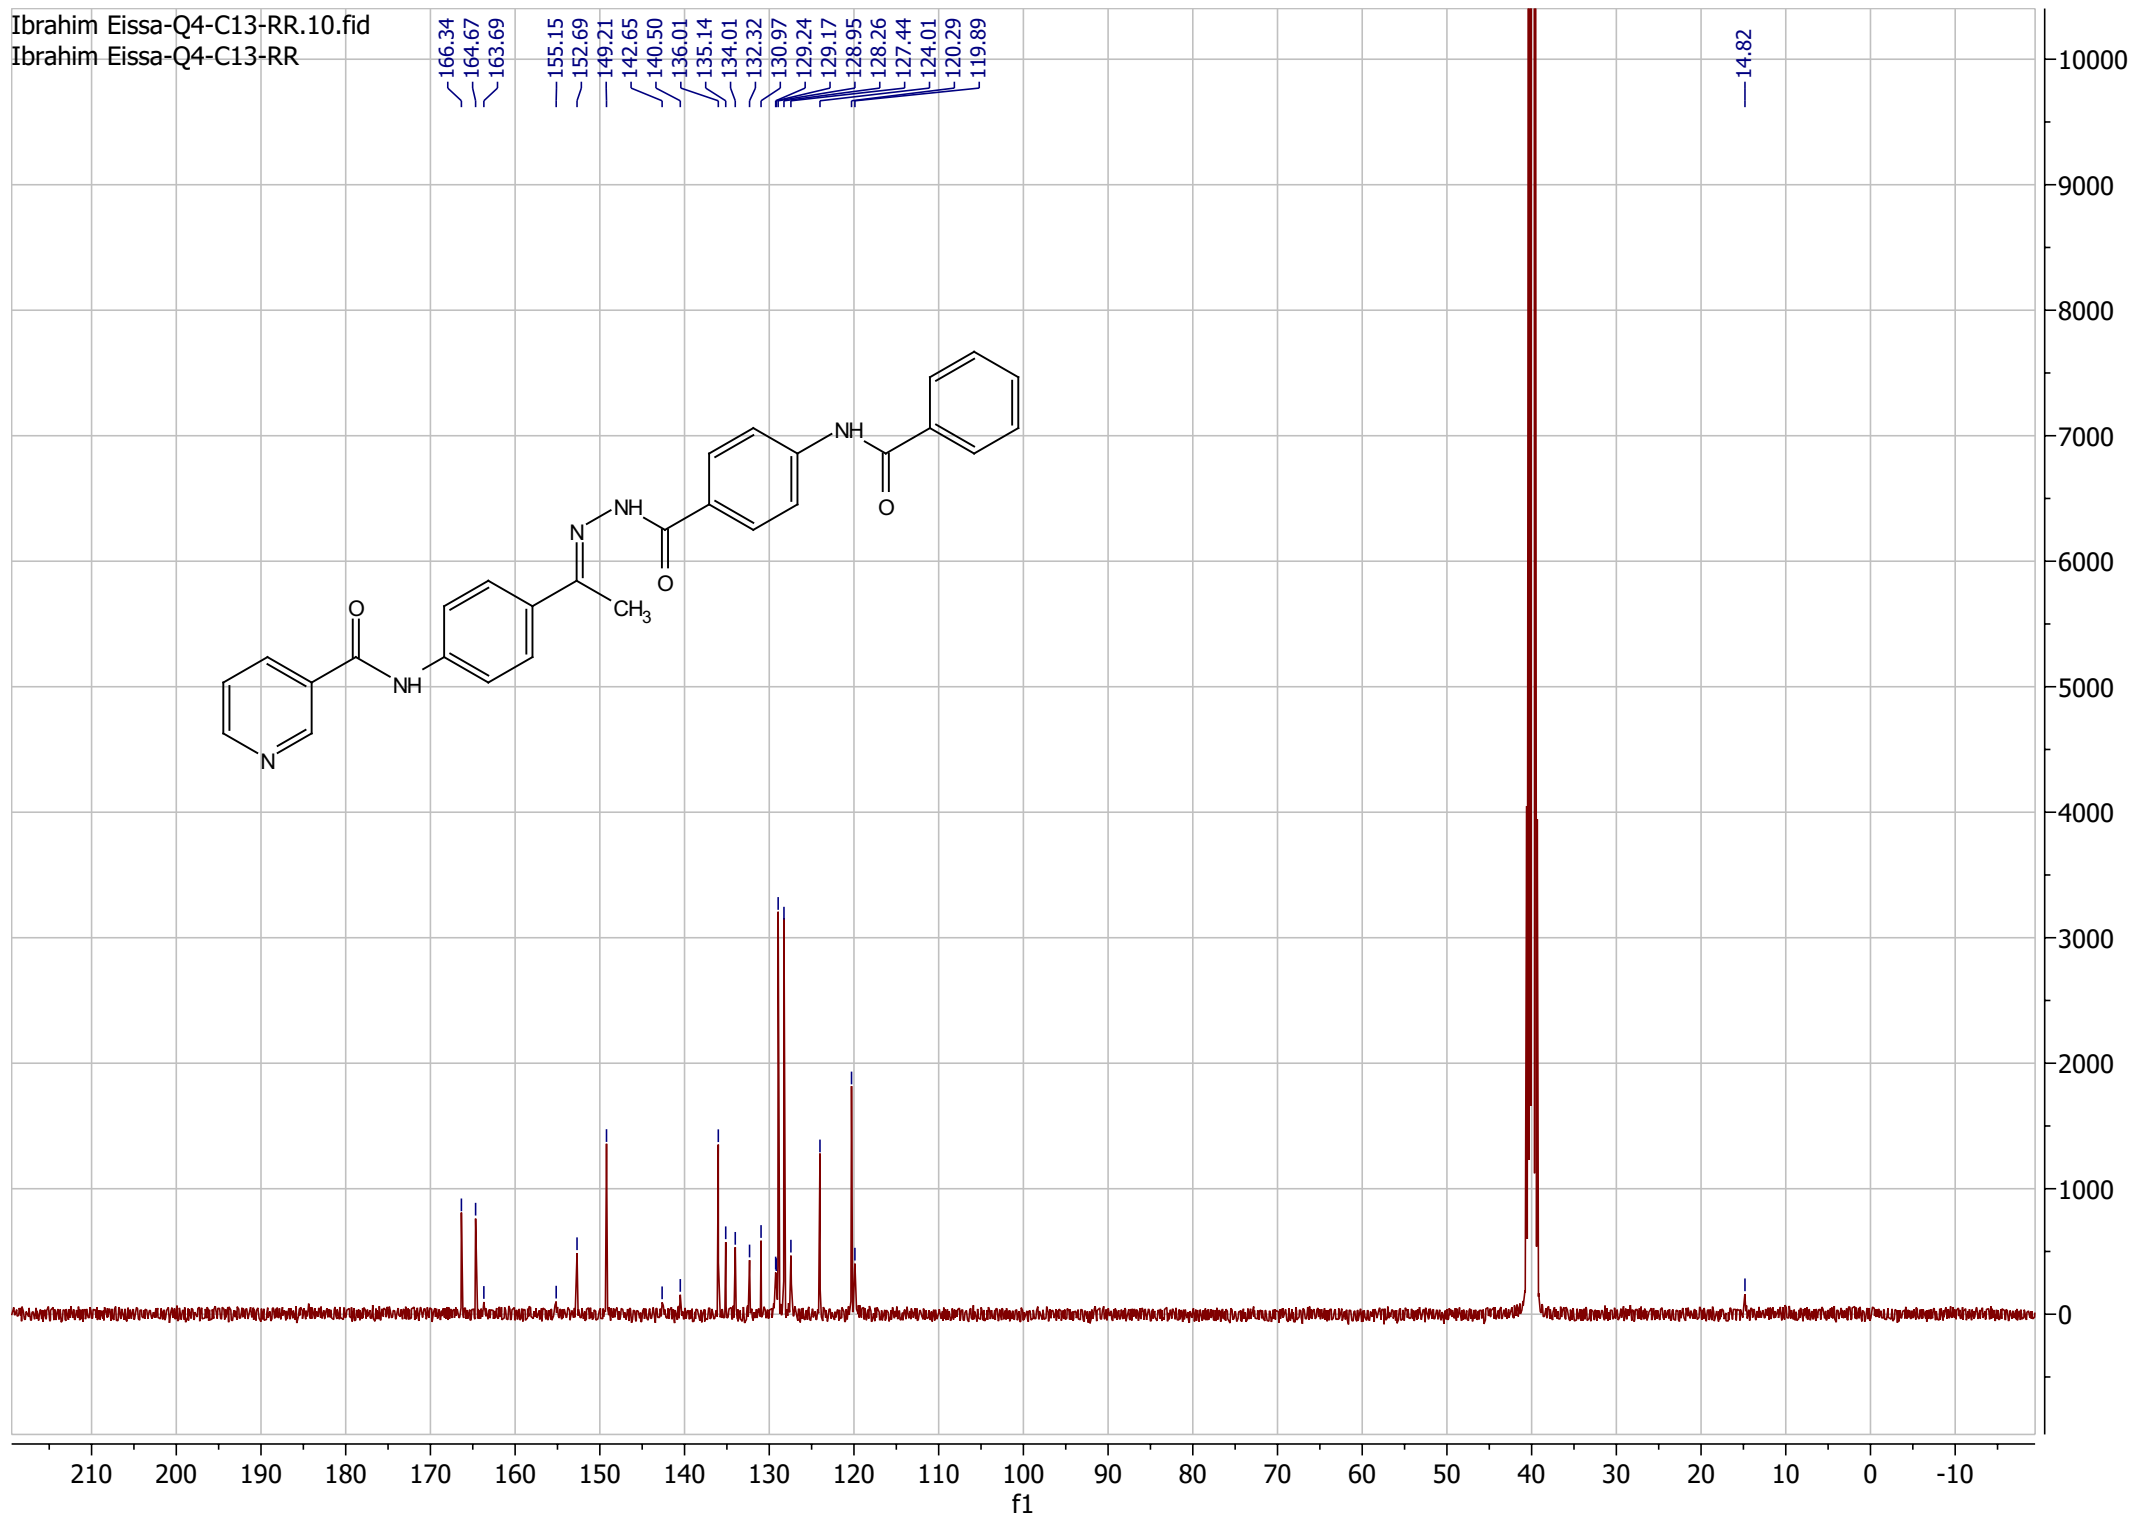



Ibrahim Eissa-Q4-C13-RR.10.fid  
Ibrahim Eissa-Q4-C13-RR

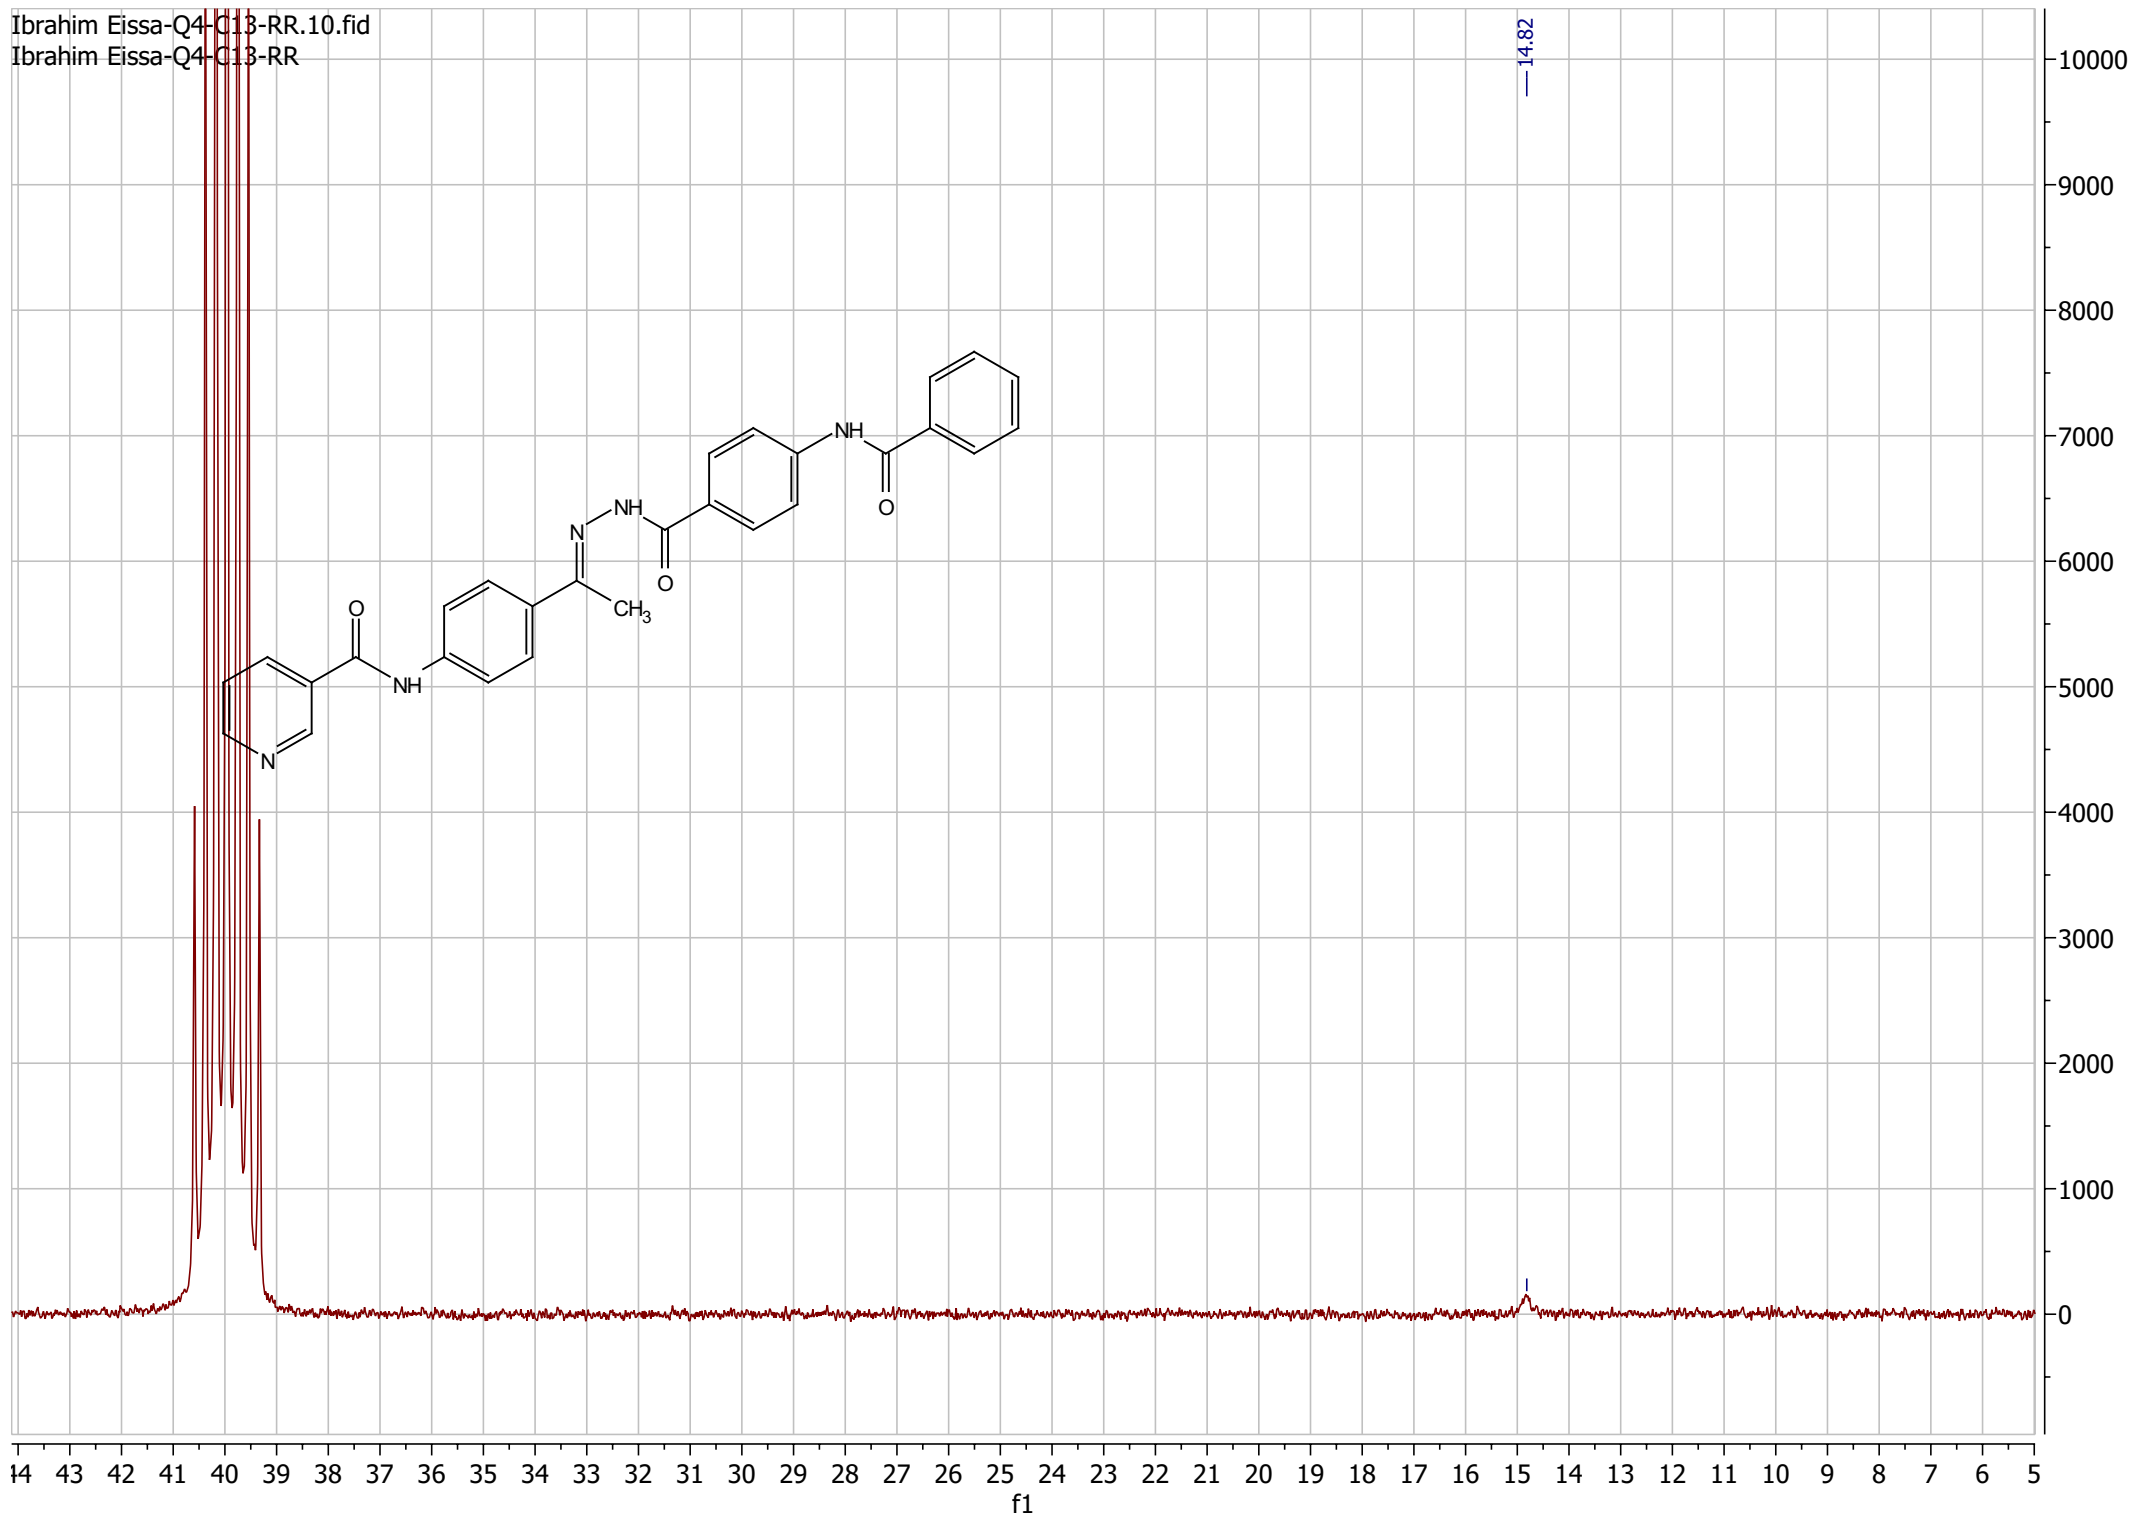

Ibrahim Eissa-Q4-C13-RR.10.fid  
Ibrahim Eissa-Q4-C13-RR

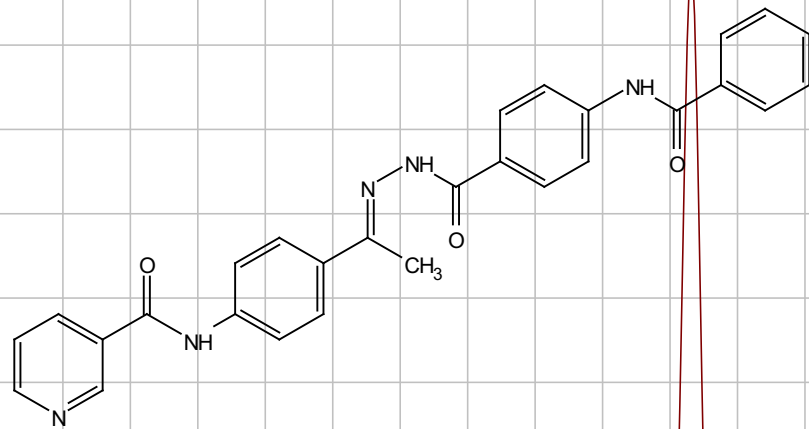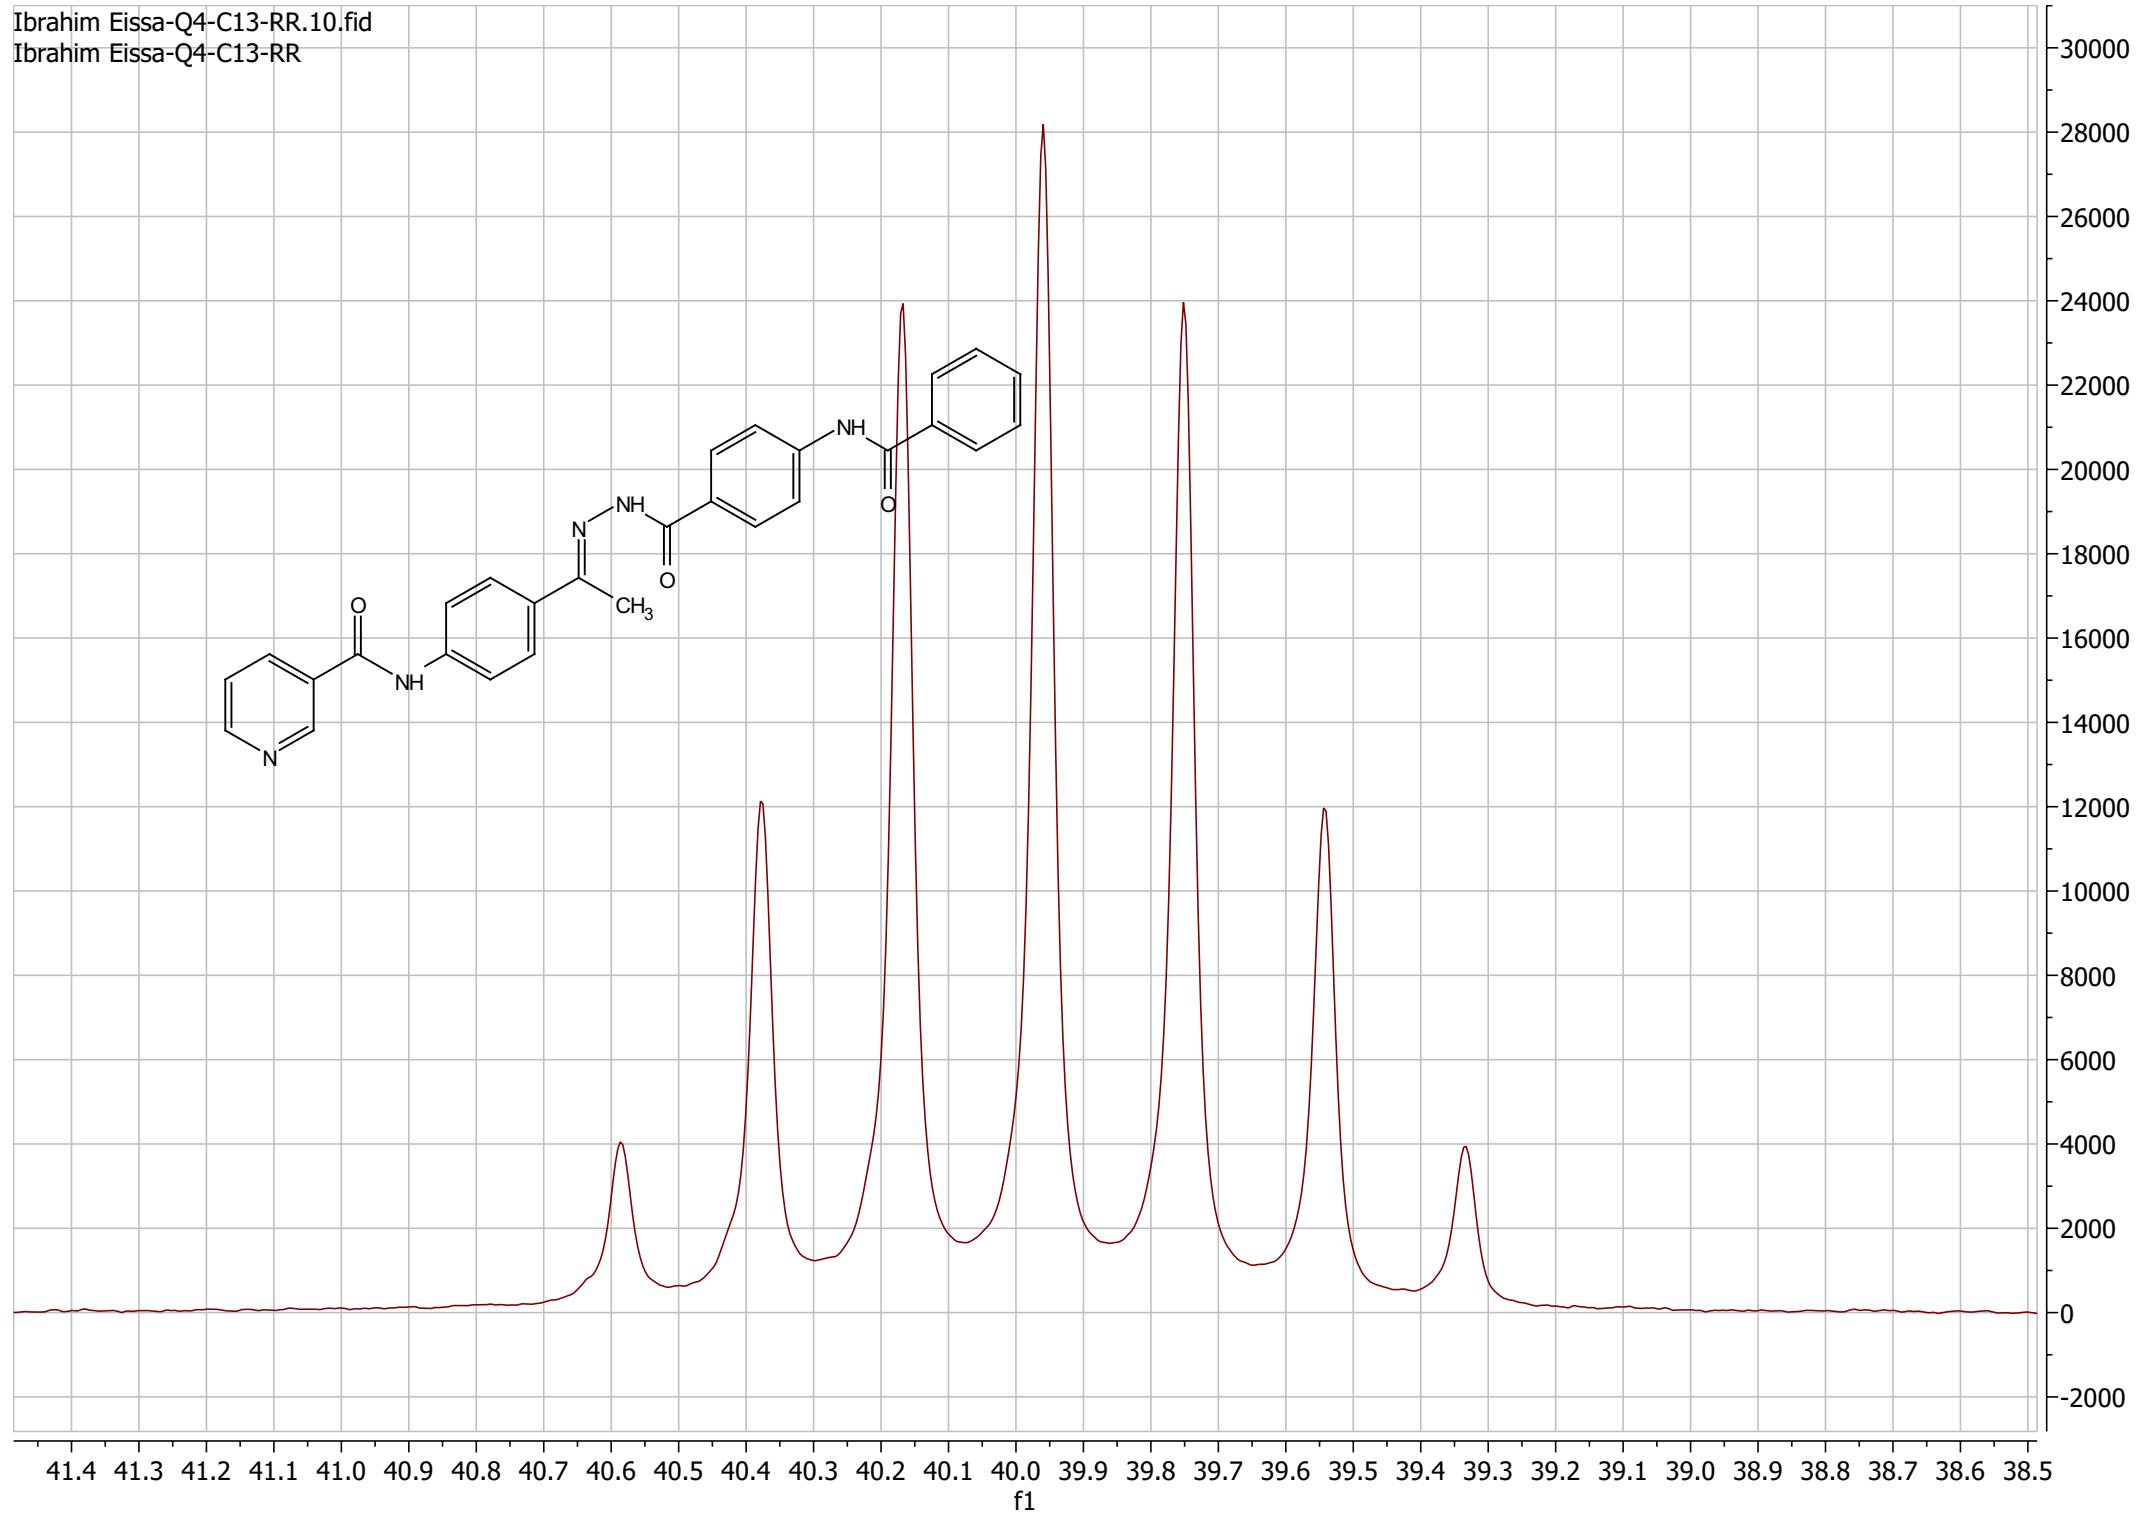

Ibrahim Eissa-Q4-C13-RR.10.fid

Ibrahim Eissa-Q4-C13-RR

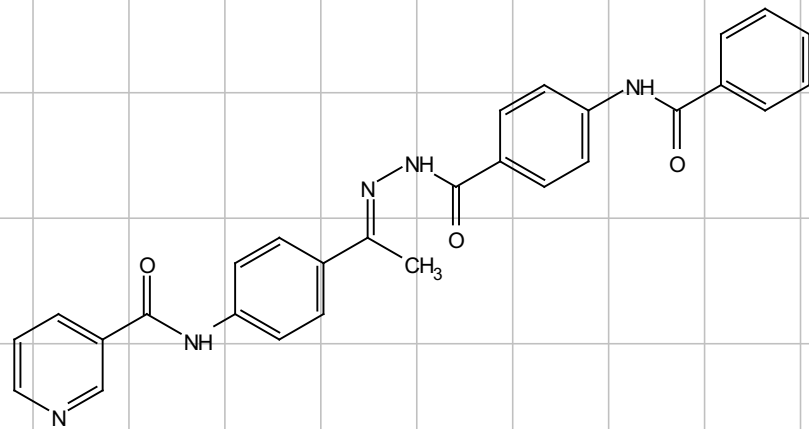

- 166.34
- 164.67
- 163.69
- 155.15
- 152.69
- 149.21
- 142.65
- 140.50
- 136.01
- 135.14
- 134.01
- 132.32
- 130.97
- 129.24
- 129.17
- 128.95
- 128.26
- 127.44
- 124.01
- 120.29
- 119.89

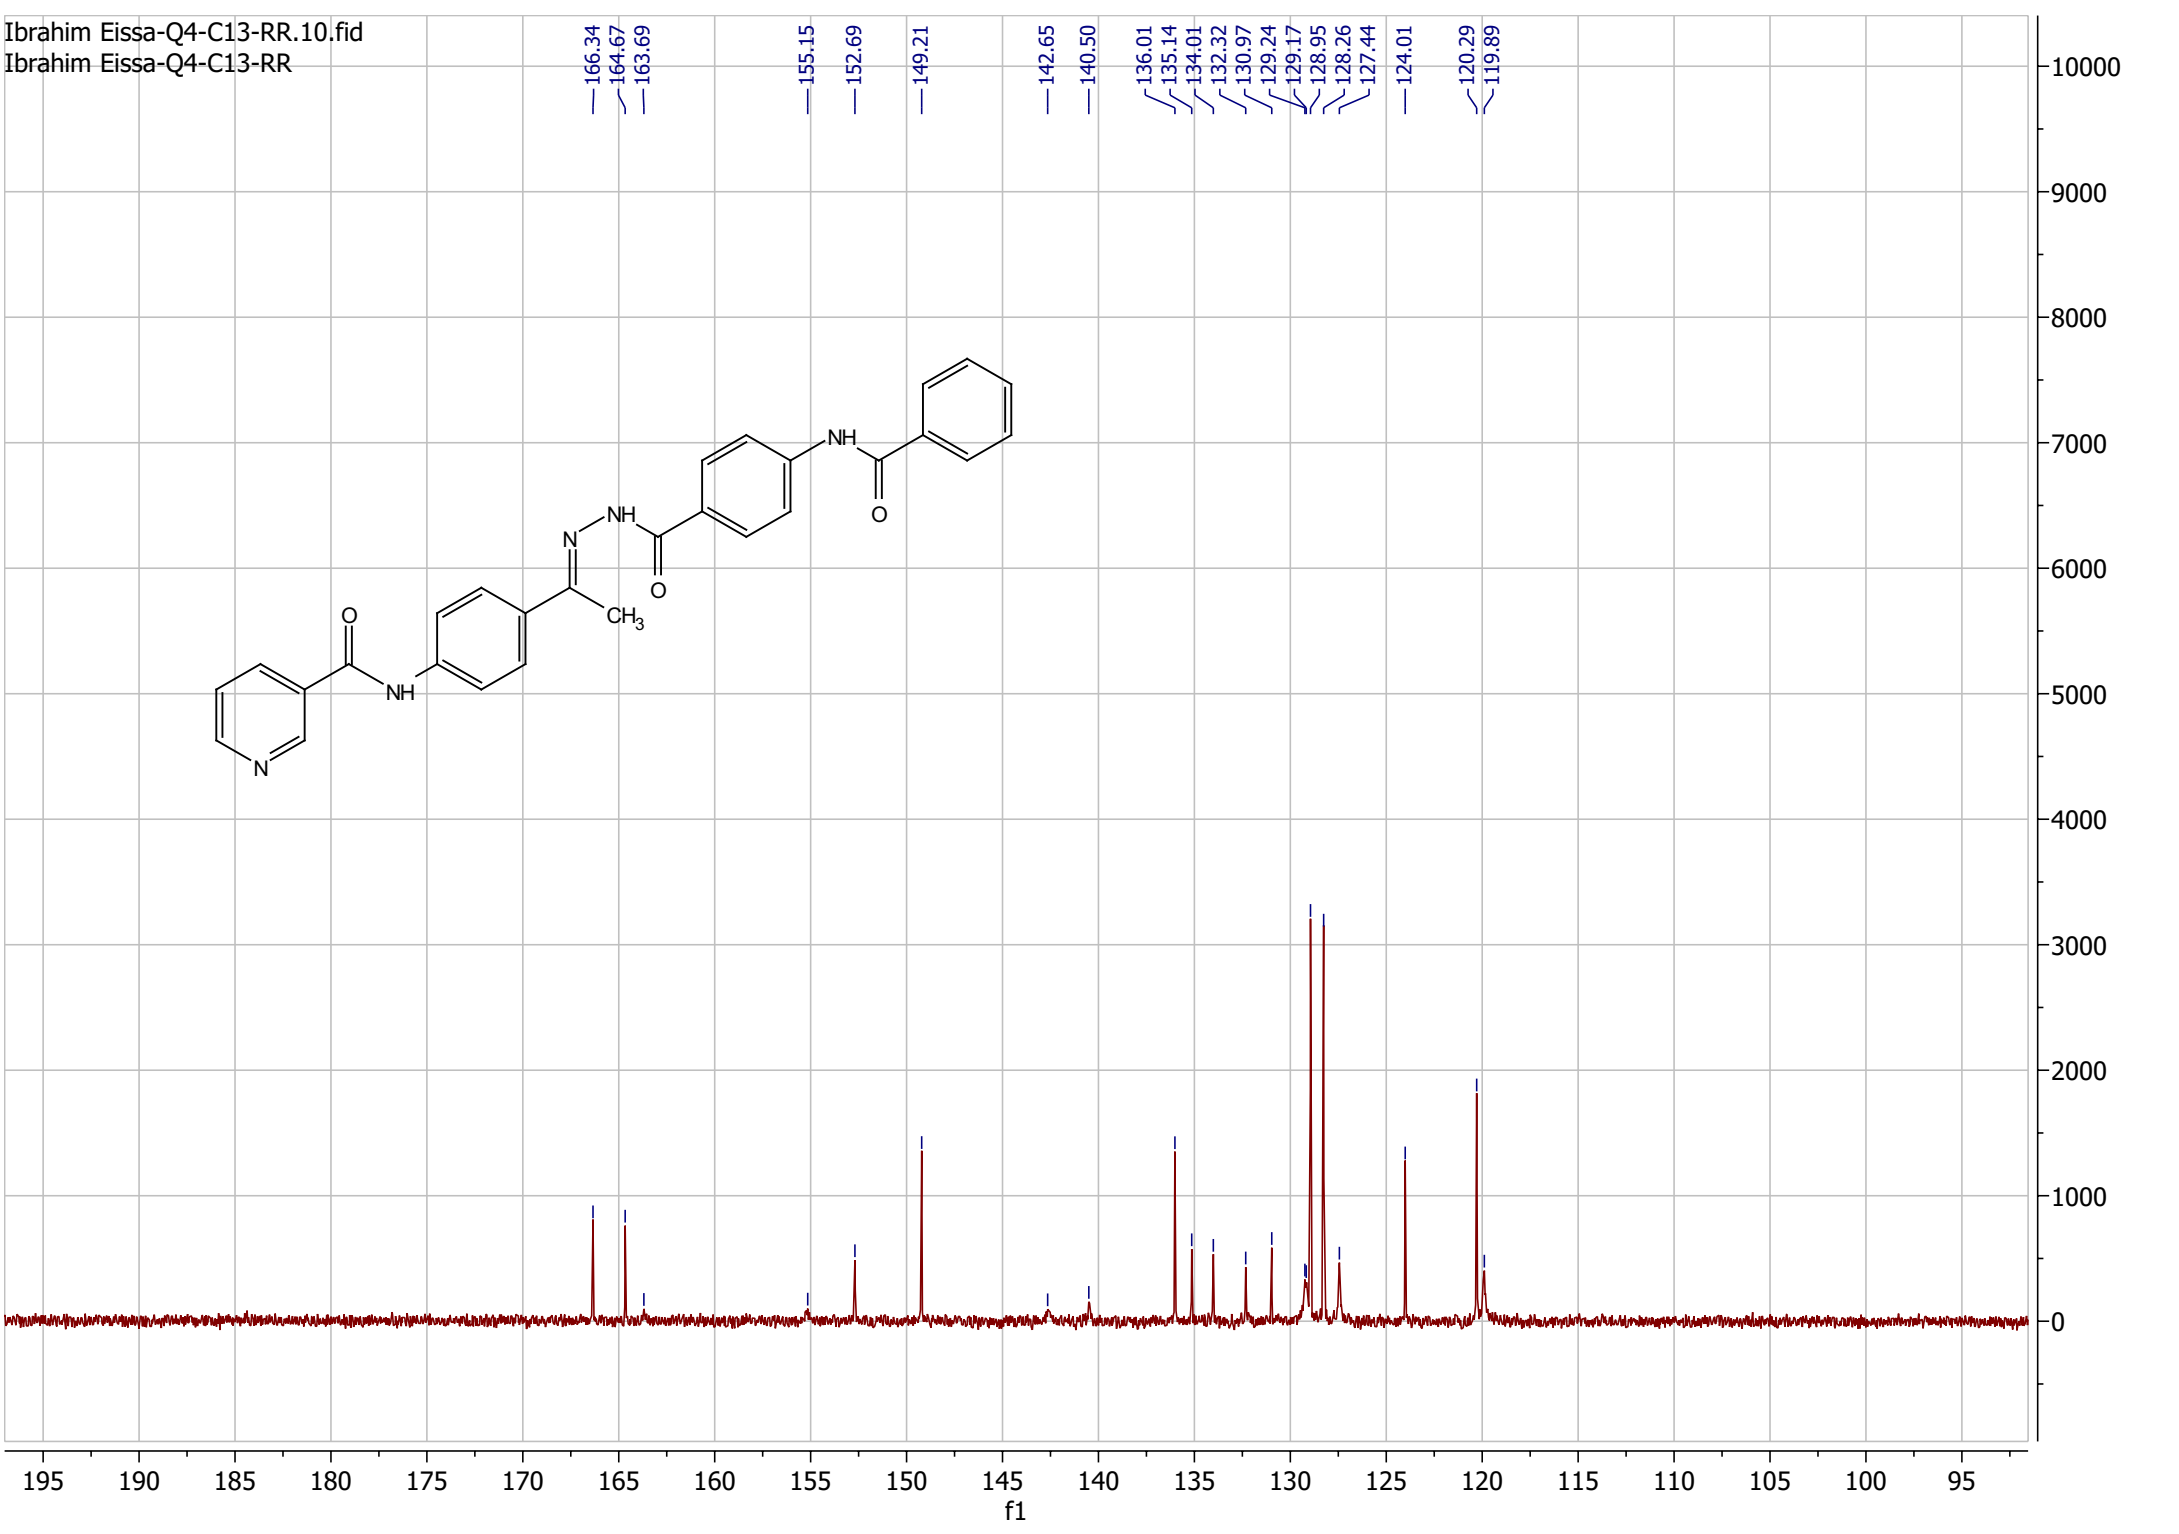

195 190 185 180 175 170 165 160 155 150 145 140 135 130 125 120 115 110 105 100 95

f1

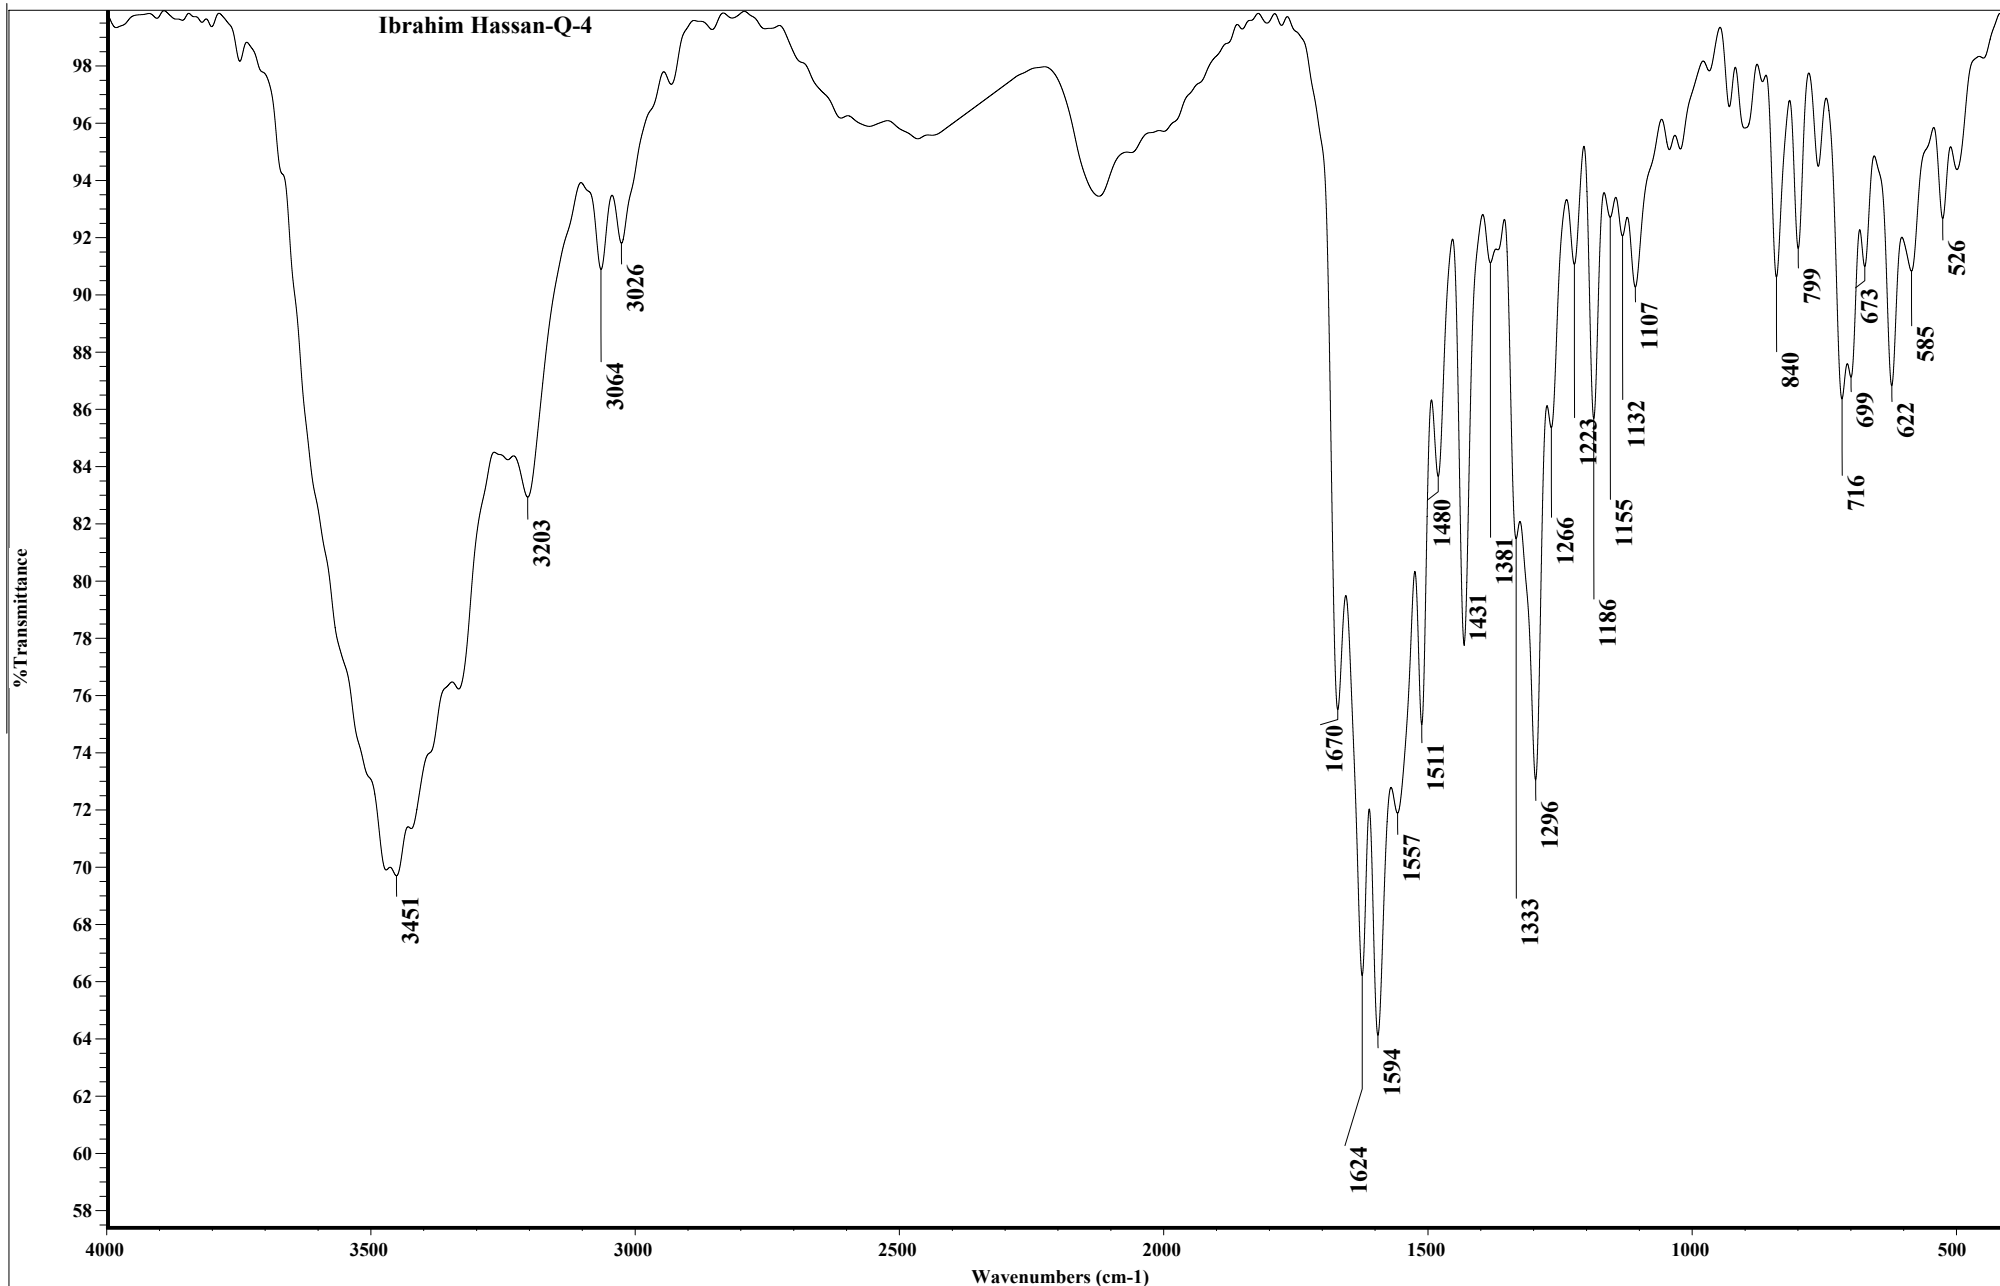

Number of sample scans: 32  
Number of background scans: 32  
Resolution: 8.000  
Sample gain: 1.0  
Optical velocity: 0.4747  
Aperture: 150.00

**ThermoFisher**  
SCIENTIFIC

Mon Jun 20 12:01:20 2022 (GMT+02:00)

*Mansoura University*  
*Faculty of Science*  
*Spectral Analysis Unit*  
*unitofspectra@gmail.com*

RT: 3.17 - 3.62 SM: 11B

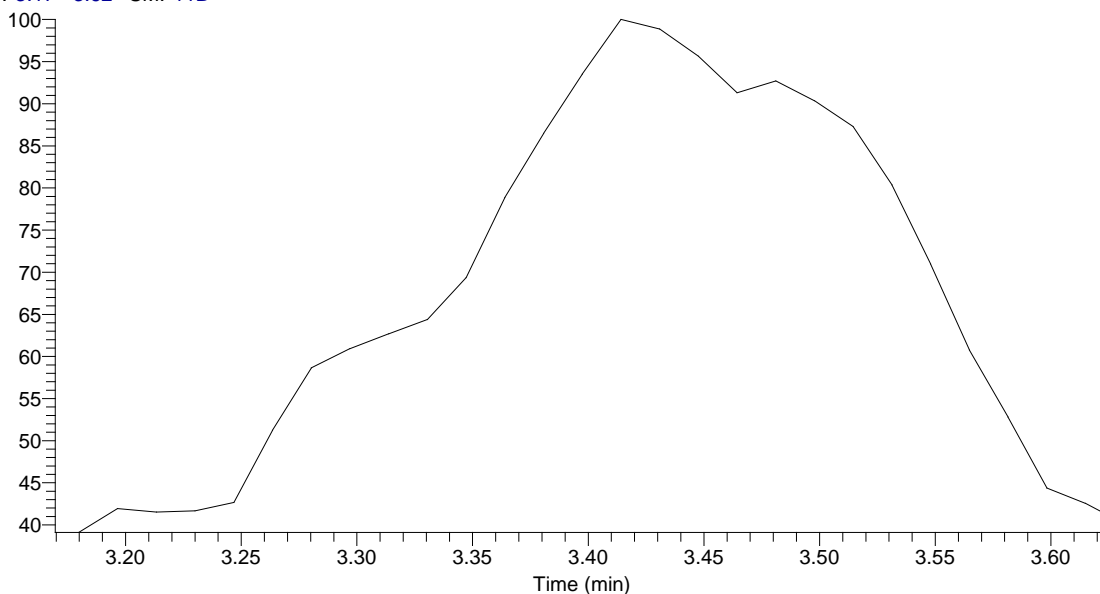

NL:  
9.42E3  
TIC MS  
IBRAHEIM-  
HASSN-  
EISA-  
Q4\_202302  
25193831

IBRAHEIM-HASSN-EISA-Q4\_20230225193831 #203-205 RT: 3.41-3.45 AV: 3 SB: 26 1.21-1.34, 0.87-1.14 NL: 1.45E2  
T: + c EI Full ms [40.00-1000.00]

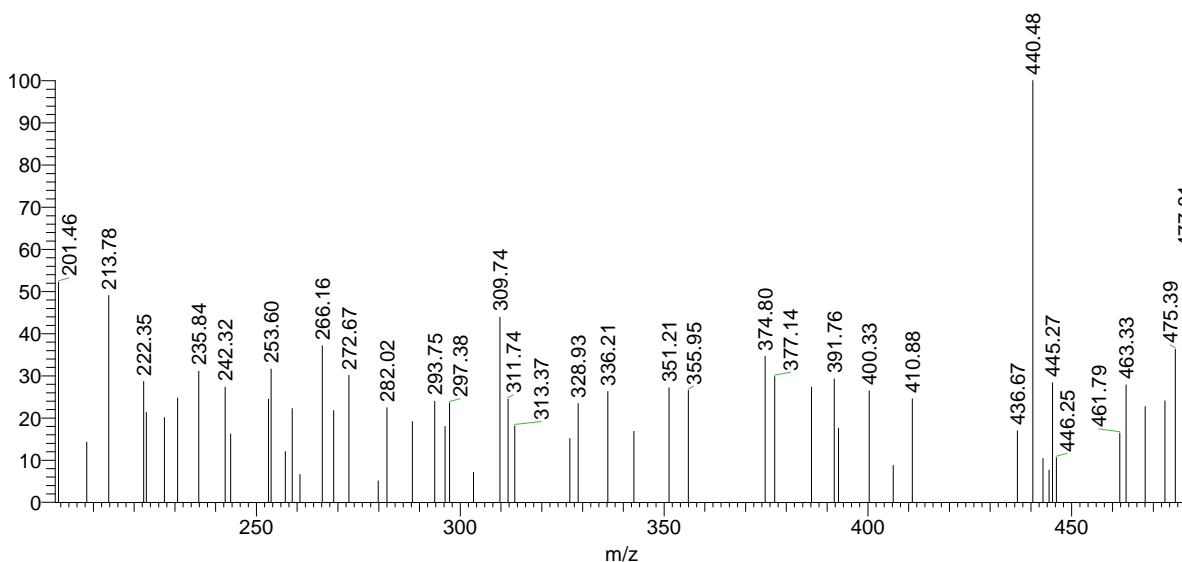

| m/z | Intensity | Relative |
|-----|-----------|----------|
|-----|-----------|----------|

|        |      |       |
|--------|------|-------|
| 201.46 | 75.6 | 52.15 |
|--------|------|-------|

|        |      |       |
|--------|------|-------|
| 208.37 | 20.6 | 14.24 |
|--------|------|-------|

|        |      |       |
|--------|------|-------|
| 213.78 | 71.1 | 49.04 |
|--------|------|-------|

|        |      |       |
|--------|------|-------|
| 222.35 | 41.5 | 28.62 |
|--------|------|-------|

|        |      |       |
|--------|------|-------|
| 223.00 | 30.8 | 21.27 |
|--------|------|-------|

|        |      |       |
|--------|------|-------|
| 227.42 | 29.1 | 20.08 |
|--------|------|-------|

|        |      |       |
|--------|------|-------|
| 230.67 | 35.9 | 24.72 |
| 235.84 | 45.1 | 31.08 |
| 242.32 | 39.5 | 27.27 |
| 243.69 | 23.5 | 16.19 |
| 252.94 | 35.4 | 24.43 |
| 253.60 | 45.8 | 31.60 |
| 257.07 | 17.4 | 12.00 |
| 258.77 | 32.2 | 22.19 |
| 260.70 | 9.5  | 6.58  |
| 266.16 | 53.8 | 37.10 |
| 268.96 | 31.5 | 21.73 |
| 272.67 | 43.6 | 30.06 |
| 279.88 | 7.3  | 5.03  |
| 282.02 | 32.5 | 22.40 |
| 288.27 | 27.7 | 19.12 |
| 293.75 | 34.7 | 23.96 |
| 296.27 | 26.0 | 17.96 |
| 297.38 | 34.1 | 23.51 |
| 303.23 | 10.3 | 7.10  |
| 309.74 | 63.6 | 43.87 |
| 311.74 | 35.4 | 24.43 |
| 313.37 | 26.3 | 18.11 |
| 326.89 | 21.9 | 15.08 |
| 328.93 | 34.0 | 23.41 |
| 336.21 | 38.1 | 26.27 |
| 342.61 | 24.4 | 16.80 |
| 351.21 | 39.3 | 27.12 |

|        |       |        |
|--------|-------|--------|
| 355.95 | 38.4  | 26.51  |
| 374.80 | 50.1  | 34.57  |
| 377.14 | 43.2  | 29.82  |
| 386.19 | 39.5  | 27.26  |
| 391.76 | 42.4  | 29.25  |
| 392.80 | 25.5  | 17.56  |
| 400.33 | 38.3  | 26.42  |
| 406.19 | 12.6  | 8.71   |
| 410.88 | 35.6  | 24.52  |
| 436.67 | 24.5  | 16.92  |
| 440.48 | 145.0 | 100.00 |
| 442.96 | 15.1  | 10.39  |
| 444.46 | 11.0  | 7.60   |
| 445.27 | 41.0  | 28.30  |
| 446.25 | 15.3  | 10.57  |
| 461.79 | 23.7  | 16.38  |
| 463.33 | 40.4  | 27.83  |
| 468.02 | 32.9  | 22.71  |
| 472.87 | 34.9  | 24.06  |
| 475.39 | 52.6  | 36.26  |
| 477.81 | 85.8  | 59.1   |

# Toxicity Report



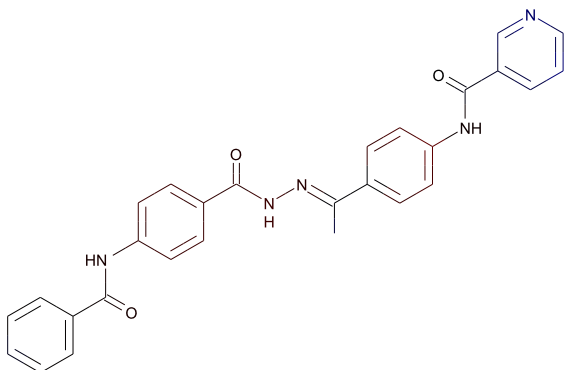

$C_{28}H_{23}N_5O_3$

Molecular Weight: 477.51391

ALogP: 3.082

Rotatable Bonds: 7

Acceptors: 5

Donors: 3

## Model Prediction

Prediction: Non-Mutagen

Probability: 0.714

Enrichment: 1.28

Bayesian Score: -1.18

Mahalanobis Distance: 8.29

Mahalanobis Distance p-value: 0.976

Prediction: Positive if the Bayesian score is above the estimated best cutoff value from minimizing the false positive and false negative rate.

Probability: The estimated probability that the sample is in the positive category. This assumes that the Bayesian score follows a normal distribution and is different from the prediction using a cutoff.

Enrichment: An estimate of enrichment, that is, the increased likelihood (versus random) of this sample being in the category.

Bayesian Score: The standard Laplacian-modified Bayesian score.

Mahalanobis Distance: The Mahalanobis distance (MD) is the distance to the center of the training data. The larger the MD, the less trustworthy the prediction.

Mahalanobis Distance p-value: The p-value gives the fraction of training data with an MD greater than or equal to the one for the given sample, assuming normally distributed data. The smaller the p-value, the less trustworthy the prediction. For highly non-normal X properties (e.g., fingerprints), the MD p-value is wildly inaccurate.

## Structural Similar Compounds

| Name               | GLYBURIDE   | 6724-53-4                                        | GLIPIZIDE   |
|--------------------|-------------|--------------------------------------------------|-------------|
| Structure          |             |                                                  |             |
| Actual Endpoint    | Non-Mutagen | Non-Mutagen                                      | Non-Mutagen |
| Predicted Endpoint | Non-Mutagen | Non-Mutagen                                      | Non-Mutagen |
| Distance           | 0.593       | 0.616                                            | 0.632       |
| Reference          | PDR 1994    | Kazius et. al., J. Med. Chem. (2005) 48, 312-320 | PDR 1994    |

## Model Applicability

Unknown features are fingerprint features in the query molecule, but not found or appearing too infrequently in the training set.

- All properties and OPS components are within expected ranges.

## Feature Contribution

### Top features for positive contribution

| Fingerprint | Bit/Smiles | Feature Structure                                                      | Score | Mutagen in training set |
|-------------|------------|------------------------------------------------------------------------|-------|-------------------------|
| SCFP_12     | 555539852  | <br>[*][cH]:[c](:[cH]:[*]<br>)C(=O)N[c]1:[cH]:[c<br>H]:[*]:[cH]:[cH]:1 | 0.447 | 22 out of 24            |

|                                               |                   |                                                                                                                                                       |              |                                |
|-----------------------------------------------|-------------------|-------------------------------------------------------------------------------------------------------------------------------------------------------|--------------|--------------------------------|
| SCFP_12                                       | 818445224         | 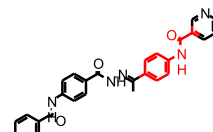<br>[*][c]1:[cH]:[cH]:[c]<br>(NC(=O)[c](:[*]):[*]<br>):[cH]:[cH]:1 | 0.434        | 12 out of 13                   |
| SCFP_12                                       | 2096901122        | <br>[*]:[cH]:[c](NC(=O)[c]<br>):[*]:[*]:[cH]:[*]<br>]              | 0.429        | 33 out of 37                   |
| <b>Top Features for negative contribution</b> |                   |                                                                                                                                                       |              |                                |
| <b>Fingerprint</b>                            | <b>Bit/Smiles</b> | <b>Feature Structure</b>                                                                                                                              | <b>Score</b> | <b>Mutagen in training set</b> |
| SCFP_12                                       | 1165971455        | <br>[*]NC(=O)[c]1:[cH]:[c<br>H]:[cH]:n:[cH]:1                      | -0.762       | 0 out of 2                     |
| SCFP_12                                       | -331724199        | <br>[*]N=C(/C)[c](:[*]<br>):[*]                                  | -0.762       | 0 out of 2                     |
| SCFP_12                                       | 903335088         | <br>[*]NC(=O)[c]1:[cH]:[c<br>H]:[*]:n:[cH]:1                     | -0.762       | 0 out of 2                     |

# Sorafenib

# TOPKAT\_Ames\_Mutagenicity

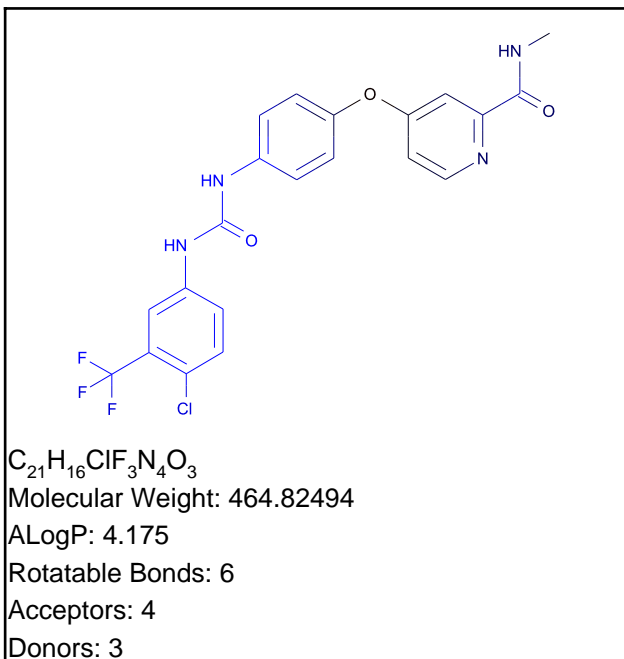

## Model Prediction

Prediction: Non-Mutagen

Probability: 0.0531

Enrichment: 0.0951

Bayesian Score: -19.7

Mahalanobis Distance: 13.1

Mahalanobis Distance p-value: 2.73e-006

Prediction: Positive if the Bayesian score is above the estimated best cutoff value from minimizing the false positive and false negative rate.

Probability: The estimated probability that the sample is in the positive category. This assumes that the Bayesian score follows a normal distribution and is different from the prediction using a cutoff.

Enrichment: An estimate of enrichment, that is, the increased likelihood (versus random) of this sample being in the category.

Bayesian Score: The standard Laplacian-modified Bayesian score.

Mahalanobis Distance: The Mahalanobis distance (MD) is the distance to the center of the training data. The larger the MD, the less trustworthy the prediction.

Mahalanobis Distance p-value: The p-value gives the fraction of training data with an MD greater than or equal to the one for the given sample, assuming normally distributed data. The smaller the p-value, the less trustworthy the prediction. For highly non-normal X properties (e.g., fingerprints), the MD p-value is wildly inaccurate.

## Structural Similar Compounds

| Name               | GLYBURIDE                                                                           | 38914-96-4                                                                          | 93957-54-1                                                                                                                                                          |
|--------------------|-------------------------------------------------------------------------------------|-------------------------------------------------------------------------------------|---------------------------------------------------------------------------------------------------------------------------------------------------------------------|
| Structure          | 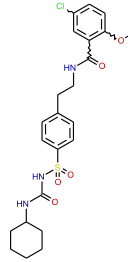 |  |                                                                                  |
| Actual Endpoint    | Non-Mutagen                                                                         | Mutagen                                                                             | Non-Mutagen                                                                                                                                                         |
| Predicted Endpoint | Non-Mutagen                                                                         | Mutagen                                                                             | Non-Mutagen                                                                                                                                                         |
| Distance           | 0.590                                                                               | 0.592                                                                               | 0.600                                                                                                                                                               |
| Reference          | PDR 1994                                                                            | Kazius et. al., J. Med. Chem. (2005) 48, 312-320                                    | US Environmental Protection Agency at <a href="http://www.epa.gov/NCCT/dsstox/sdf_isscan_external.html">http://www.epa.gov/NCCT/dsstox/sdf_isscan_external.html</a> |

## Model Applicability

Unknown features are fingerprint features in the query molecule, but not found or appearing too infrequently in the training set.

- All properties and OPS components are within expected ranges.

## Feature Contribution

### Top features for positive contribution

| Fingerprint | Bit/Smiles | Feature Structure                                                                                                                                                  | Score | Mutagen in training set |
|-------------|------------|--------------------------------------------------------------------------------------------------------------------------------------------------------------------|-------|-------------------------|
| SCFP_12     | 347281112  | 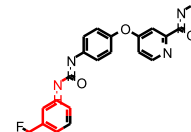<br><chem>[*]N(c1c:[cH]:[*]:[c]([*]):[c]([*]:[c]([*]:1)C([*])([*])[*])</chem> | 0.337 | 18 out of 22            |

|                                               |                   |                                                                                                                                                                          |              |                                |
|-----------------------------------------------|-------------------|--------------------------------------------------------------------------------------------------------------------------------------------------------------------------|--------------|--------------------------------|
| SCFP_12                                       | 1208843554        | 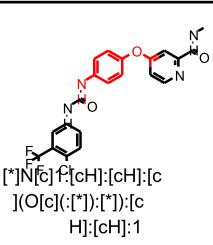<br>[*]N(c)F[cH]:[cH]:[c<br>(O[c](:[*]:[*]):[c<br>H]:[cH]:1                            | 0.337        | 6 out of 7                     |
| SCFP_12                                       | -1943080297       | <br>[*]N(c)F[cH]:[cH]:[c<br>(O[c]2:[cH]:[cH]:[*<br>]:[c]([*]):[cH]:2):[<br>cH]:[cH]:1 | 0.304        | 5 out of 6                     |
| <b>Top Features for negative contribution</b> |                   |                                                                                                                                                                          |              |                                |
| <b>Fingerprint</b>                            | <b>Bit/Smiles</b> | <b>Feature Structure</b>                                                                                                                                                 | <b>Score</b> | <b>Mutagen in training set</b> |
| SCFP_12                                       | 816802409         | <br>[*]NC(=O)N(c)1:[cH]:[<br>cH]:[c]([*]):[cH]:[c<br>H]:1                             | -1.82        | 0 out of 9                     |
| SCFP_12                                       | -1903175541       | <br>[*][c]([*]):[c]:[cH<br>]:[*]C(F)(F)F                                             | -1.51        | 3 out of 30                    |
| SCFP_12                                       | -300280774        | <br>[*]:[c]([*])C(F)(F)F                                                            | -1.51        | 3 out of 30                    |

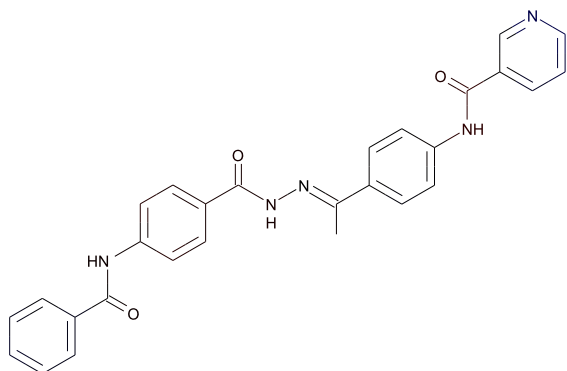

$C_{28}H_{23}N_5O_3$

Molecular Weight: 477.51391

ALogP: 3.082

Rotatable Bonds: 7

Acceptors: 5

Donors: 3

## Model Prediction

Prediction: Non-Toxic

Probability: 0.506

Enrichment: 0.963

Bayesian Score: -1.12

Mahalanobis Distance: 9.15

Mahalanobis Distance p-value: 0.136

Prediction: Positive if the Bayesian score is above the estimated best cutoff value from minimizing the false positive and false negative rate.

Probability: The estimated probability that the sample is in the positive category. This assumes that the Bayesian score follows a normal distribution and is different from the prediction using a cutoff.

Enrichment: An estimate of enrichment, that is, the increased likelihood (versus random) of this sample being in the category.

Bayesian Score: The standard Laplacian-modified Bayesian score.

Mahalanobis Distance: The Mahalanobis distance (MD) is the distance to the center of the training data. The larger the MD, the less trustworthy the prediction.

Mahalanobis Distance p-value: The p-value gives the fraction of training data with an MD greater than or equal to the one for the given sample, assuming normally distributed data. The smaller the p-value, the less trustworthy the prediction. For highly non-normal X properties (e.g., fingerprints), the MD p-value is wildly inaccurate.

## Structural Similar Compounds

| Name               | Ochratoxin a                             | Amsacrine                             | Citreoviridin                          |
|--------------------|------------------------------------------|---------------------------------------|----------------------------------------|
| Structure          |                                          |                                       |                                        |
| Actual Endpoint    | Toxic                                    | Toxic                                 | Toxic                                  |
| Predicted Endpoint | Toxic                                    | Toxic                                 | Toxic                                  |
| Distance           | 0.634                                    | 0.666                                 | 0.680                                  |
| Reference          | Toxicol Appl Pharmacol 37(2):331-8; 1976 | Fundam Appl Toxicol 7(2):214-20; 1986 | Food Chem Toxicol 24(12):1315-20; 1986 |

## Model Applicability

Unknown features are fingerprint features in the query molecule, but not found or appearing too infrequently in the training set.

- OPS PC17 out of range. Value: 2.9151. Training min, max, SD, explained variance: -2.7025, 2.8536, 1.067, 0.0167.

## Feature Contribution

### Top features for positive contribution

| Fingerprint | Bit/Smiles | Feature Structure                                         | Score | Toxic in training set |
|-------------|------------|-----------------------------------------------------------|-------|-----------------------|
| SCFP_6      | 282594097  | <br><chem>[*]NC(=O)[c]1:[cH]:[cH]:[cH]:[cH]:[cH]:1</chem> | 0.441 | 3 out of 3            |

| SCFP_6                                 | 1257084377 | 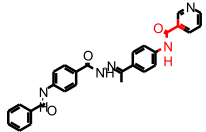<br><chem>[*]NC(=O)[c](:[*]);[*]<br/>]</chem>              | 0.362  | 14 out of 18          |
|----------------------------------------|------------|-----------------------------------------------------------------------------------------------------------------------------------------------|--------|-----------------------|
| SCFP_6                                 | 903335088  | <br><chem>[*]NC(=O)[c]1:[cH]:[c<br/>H]:[*]:n:[cH]:1</chem> | 0.271  | 1 out of 1            |
| Top Features for negative contribution |            |                                                                                                                                               |        |                       |
| Fingerprint                            | Bit/Smiles | Feature Structure                                                                                                                             | Score  | Toxic in training set |
| SCFP_6                                 | -758850909 | <br><chem>[*][c]1:[*]:n:[cH]:[c<br/>H]:[cH]:1</chem>       | -0.646 | 2 out of 9            |
| SCFP_6                                 | -937094999 | <br><chem>[*]1:[cH]:[cH]:[cH]:n<br/>:[cH]:1</chem>       | -0.358 | 3 out of 9            |
| SCFP_6                                 | -496201075 | <br><chem>[*]:[cH]:[cH]:n:[*]</chem>                     | -0.289 | 8 out of 21           |

# Sorafenib

# TOPKAT\_Developmental\_Toxicity\_Potential

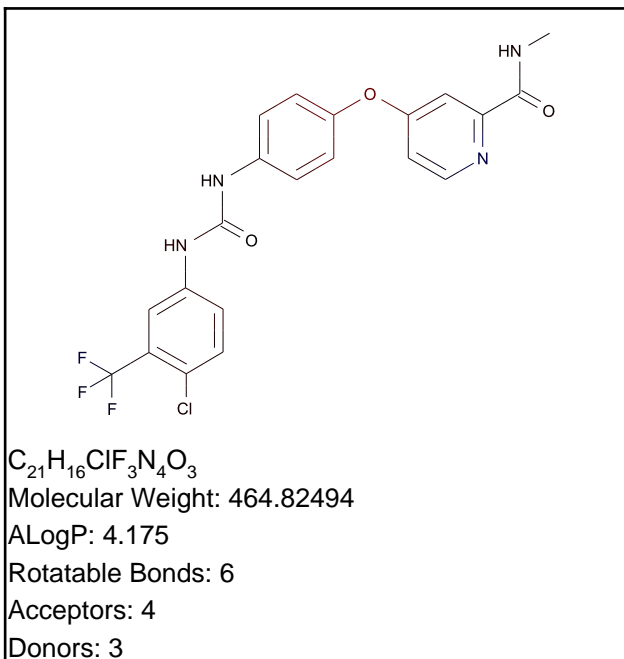

## Model Prediction

Prediction: Toxic

Probability: 0.592

Enrichment: 1.13

Bayesian Score: 1.15

Mahalanobis Distance: 12.6

Mahalanobis Distance p-value: 2.07e-006

Prediction: Positive if the Bayesian score is above the estimated best cutoff value from minimizing the false positive and false negative rate.

Probability: The estimated probability that the sample is in the positive category. This assumes that the Bayesian score follows a normal distribution and is different from the prediction using a cutoff.

Enrichment: An estimate of enrichment, that is, the increased likelihood (versus random) of this sample being in the category.

Bayesian Score: The standard Laplacian-modified Bayesian score.

Mahalanobis Distance: The Mahalanobis distance (MD) is the distance to the center of the training data. The larger the MD, the less trustworthy the prediction.

Mahalanobis Distance p-value: The p-value gives the fraction of training data with an MD greater than or equal to the one for the given sample, assuming normally distributed data. The smaller the p-value, the less trustworthy the prediction. For highly non-normal X properties (e.g., fingerprints), the MD p-value is wildly inaccurate.

## Structural Similar Compounds

| Name               | Chenodioli                                                                          | Amsacrine                                                                           | Ochratoxin a                                                                        |
|--------------------|-------------------------------------------------------------------------------------|-------------------------------------------------------------------------------------|-------------------------------------------------------------------------------------|
| Structure          | 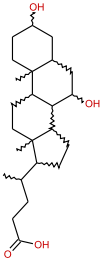 |  |  |
| Actual Endpoint    | Toxic                                                                               | Toxic                                                                               | Toxic                                                                               |
| Predicted Endpoint | Toxic                                                                               | Toxic                                                                               | Toxic                                                                               |
| Distance           | 0.631                                                                               | 0.637                                                                               | 0.644                                                                               |
| Reference          | Arch Int Pharm 246:149-158; 1980                                                    | Fundam Appl Toxicol 7(2):214-20; 1986                                               | Toxicol Appl Pharmacol 37(2):331-8; 1976                                            |

## Model Applicability

Unknown features are fingerprint features in the query molecule, but not found or appearing too infrequently in the training set.

1. All properties and OPS components are within expected ranges.

## Feature Contribution

### Top features for positive contribution

| Fingerprint | Bit/Smiles | Feature Structure                                                                                                                             | Score | Toxic in training set |
|-------------|------------|-----------------------------------------------------------------------------------------------------------------------------------------------|-------|-----------------------|
| SCFP_6      | 1559190850 | 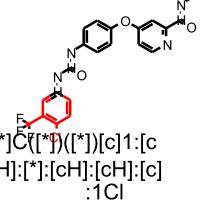<br>[*]C( [* ]) ( [* ]) [c]1:[c]H:[*]:[cH]:[cH]:[c]::1Cl | 0.441 | 3 out of 3            |

|                                               |                   |                                                                                                                                          |              |                              |
|-----------------------------------------------|-------------------|------------------------------------------------------------------------------------------------------------------------------------------|--------------|------------------------------|
| SCFP_6                                        | -488587948        | 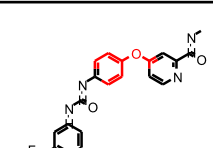<br>[*]:[c]([*])O[c]1:[cH]:[cH]:[*]:[cH]:[cH]:1        | 0.381        | 2 out of 2                   |
| SCFP_6                                        | -347281112        | <br>[*]N(c1:[cH]:[*]:[c]([*]):[c]([*])C([*])([*])[*]) | 0.381        | 2 out of 2                   |
| <b>Top Features for negative contribution</b> |                   |                                                                                                                                          |              |                              |
| <b>Fingerprint</b>                            | <b>Bit/Smiles</b> | <b>Feature Structure</b>                                                                                                                 | <b>Score</b> | <b>Toxic in training set</b> |
| SCFP_6                                        | -1794974220       | <br>[*]C([*])([*])F                                   | -0.55        | 2 out of 8                   |
| SCFP_6                                        | -937094999        | <br>[*]1:[cH]:[cH]:[cH]:n:[cH]:1                     | -0.358       | 3 out of 9                   |
| SCFP_6                                        | -496201075        | <br>[*]:[cH]:[cH]:n:[*]                             | -0.289       | 8 out of 21                  |



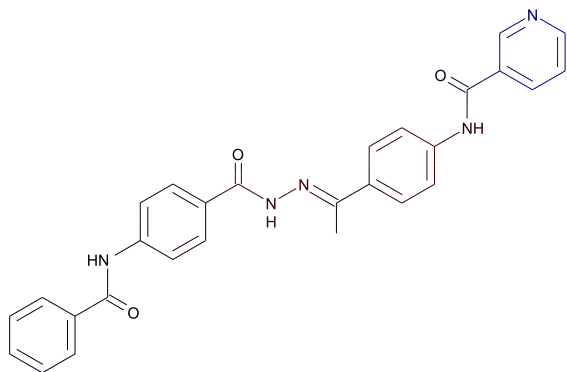
 $C_{28}H_{23}N_5O_3$ 

Molecular Weight: 477.51391

ALogP: 3.082

Rotatable Bonds: 7

Acceptors: 5

Donors: 3

## Model Prediction

**Prediction: Carcinogen**

Probability: 0.247

Enrichment: 0.771

Bayesian Score: -0.867

Mahalanobis Distance: 13

Mahalanobis Distance p-value: 0.000533

Prediction: Positive if the Bayesian score is above the estimated best cutoff value from minimizing the false positive and false negative rate.

Probability: The estimated probability that the sample is in the positive category. This assumes that the Bayesian score follows a normal distribution and is different from the prediction using a cutoff.

Enrichment: An estimate of enrichment, that is, the increased likelihood (versus random) of this sample being in the category.

Bayesian Score: The standard Laplacian-modified Bayesian score.

Mahalanobis Distance: The Mahalanobis distance (MD) is the distance to the center of the training data. The larger the MD, the less trustworthy the prediction.

Mahalanobis Distance p-value: The p-value gives the fraction of training data with an MD greater than or equal to the one for the given sample, assuming normally distributed data. The smaller the p-value, the less trustworthy the prediction. For highly non-normal X properties (e.g., fingerprints), the MD p-value is wildly inaccurate.

## Structural Similar Compounds

| Name               | Glimepride                                                          | Glyburide                                                           | Glipizide                                                           |
|--------------------|---------------------------------------------------------------------|---------------------------------------------------------------------|---------------------------------------------------------------------|
| Structure          |                                                                     |                                                                     |                                                                     |
| Actual Endpoint    | Carcinogen                                                          | Non-Carcinogen                                                      | Non-Carcinogen                                                      |
| Predicted Endpoint | Carcinogen                                                          | Non-Carcinogen                                                      | Non-Carcinogen                                                      |
| Distance           | 0.549                                                               | 0.588                                                               | 0.634                                                               |
| Reference          | US FDA (Centre for Drug Eval.& Res./Off. Testing & Res.) Sept. 1997 | US FDA (Centre for Drug Eval.& Res./Off. Testing & Res.) Sept. 1997 | US FDA (Centre for Drug Eval.& Res./Off. Testing & Res.) Sept. 1997 |

## Model Applicability

Unknown features are fingerprint features in the query molecule, but not found or appearing too infrequently in the training set.

1. All properties and OPS components are within expected ranges.
2. Unknown ECFP\_2 feature: 128986386: [\*]N=C(/C)\[c](:[\*]):[\*]
3. Unknown ECFP\_2 feature: 560380707: [\*]NN=C([\*])[\*]

## Feature Contribution

### Top features for positive contribution

| Fingerprint | Bit/Smiles | Feature Structure | Score | Carcinogen in training set |
|-------------|------------|-------------------|-------|----------------------------|
| ECFP_6      | 1087070950 | <br>[*]N=[*]      | 0.724 | 10 out of 14               |

| ECFP_6                                 | 544048674   | 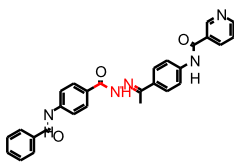<br><chem>[*]C(=[*])NN=[*]</chem>                       | 0.617  | 2 out of 2                 |
|----------------------------------------|-------------|--------------------------------------------------------------------------------------------------------------------------------------------|--------|----------------------------|
| ECFP_6                                 | 738938915   | <br><chem>[*]C(=[*])N[c]1:[cH]:[cH]:[cH]:[cH]:1</chem>  | 0.617  | 2 out of 2                 |
| Top Features for negative contribution |             |                                                                                                                                            |        |                            |
| Fingerprint                            | Bit/Smiles  | Feature Structure                                                                                                                          | Score  | Carcinogen in training set |
| ECFP_6                                 | 2013347047  | <br><chem>[*][c]1:[*]:n:[cH]:[cH]:[cH]:1</chem>         | -0.805 | 0 out of 4                 |
| ECFP_6                                 | -1818873508 | <br><chem>[*][c]1:[cH]:[cH]:[cH]:[cH]:n:[cH]:1</chem> | -0.482 | 0 out of 2                 |
| ECFP_6                                 | 764951226   | <br><chem>[*]1:[cH]:[cH]:[cH]:n:[cH]:1</chem>         | -0.482 | 0 out of 2                 |

# Sorafenib

# TOPKAT\_Mouse\_Female\_FDA\_None\_vs\_Carcinogen

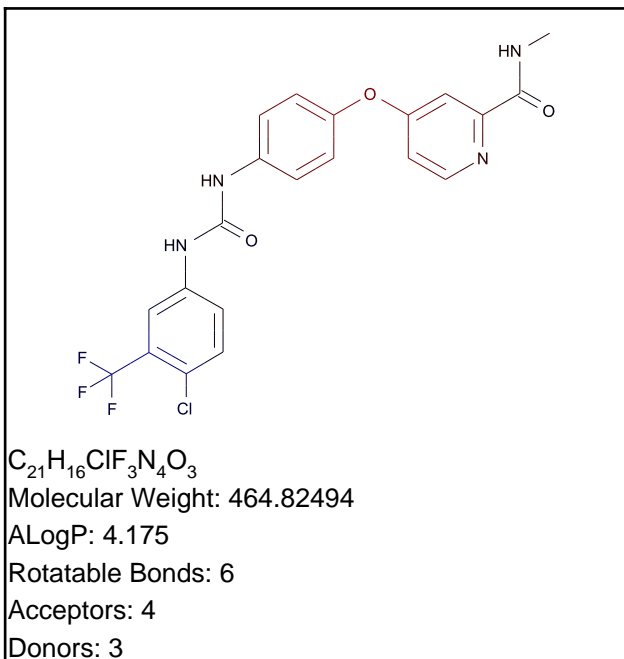

## Model Prediction

Prediction: **Carcinogen**

Probability: 0.257

Enrichment: 0.801

Bayesian Score: -0.321

Mahalanobis Distance: 14.9

Mahalanobis Distance p-value: 4.21e-007

Prediction: Positive if the Bayesian score is above the estimated best cutoff value from minimizing the false positive and false negative rate.

Probability: The estimated probability that the sample is in the positive category. This assumes that the Bayesian score follows a normal distribution and is different from the prediction using a cutoff.

Enrichment: An estimate of enrichment, that is, the increased likelihood (versus random) of this sample being in the category.  
 Bayesian Score: The standard Laplacian-modified Bayesian score.

Mahalanobis Distance: The Mahalanobis distance (MD) is the distance to the center of the training data. The larger the MD, the less trustworthy the prediction.

Mahalanobis Distance p-value: The p-value gives the fraction of training data with an MD greater than or equal to the one for the given sample, assuming normally distributed data. The smaller the p-value, the less trustworthy the prediction. For highly non-normal X properties (e.g., fingerprints), the MD p-value is wildly inaccurate.

## Structural Similar Compounds

| Name               | Glimepiride                                                                         | Glyburide                                                                           | Fluvastatin                                                                         |
|--------------------|-------------------------------------------------------------------------------------|-------------------------------------------------------------------------------------|-------------------------------------------------------------------------------------|
| Structure          | 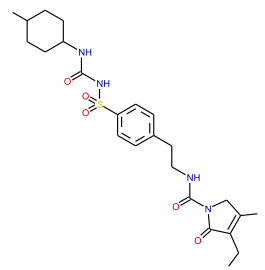 |  |  |
| Actual Endpoint    | Carcinogen                                                                          | Non-Carcinogen                                                                      | Non-Carcinogen                                                                      |
| Predicted Endpoint | Carcinogen                                                                          | Non-Carcinogen                                                                      | Non-Carcinogen                                                                      |
| Distance           | 0.605                                                                               | 0.615                                                                               | 0.625                                                                               |
| Reference          | US FDA (Centre for Drug Eval.& Res./Off. Testing & Res.) Sept. 1997                 | US FDA (Centre for Drug Eval.& Res./Off. Testing & Res.) Sept. 1997                 | US FDA (Centre for Drug Eval.& Res./Off. Testing & Res.) Sept. 1997                 |

## Model Applicability

Unknown features are fingerprint features in the query molecule, but not found or appearing too infrequently in the training set.

- OPS PC20 out of range. Value: -3.3309. Training min, max, SD, explained variance: -3.1862, 4.4571, 1.28, 0.0167.

## Feature Contribution

### Top features for positive contribution

| Fingerprint | Bit/Smiles | Feature Structure                                                                                                                               | Score | Carcinogen in training set |
|-------------|------------|-------------------------------------------------------------------------------------------------------------------------------------------------|-------|----------------------------|
| ECFP_6      | 738938915  | 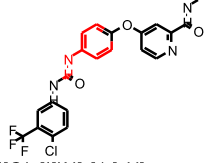<br><chem>[*]C(=[*])N[c]1:[cH]:[cH]:[*]:[cH]:[cH]:1</chem> | 0.617 | 2 out of 2                 |

|                                               |                   |                                                                                                                                                  |              |                                   |
|-----------------------------------------------|-------------------|--------------------------------------------------------------------------------------------------------------------------------------------------|--------------|-----------------------------------|
| ECFP_6                                        | 1338334141        | 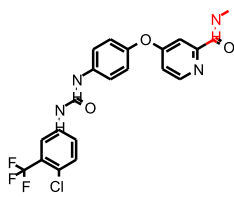<br><chem>[*]C(=[*])NC</chem>                                  | 0.442        | 2 out of 3                        |
| ECFP_6                                        | 1305253718        | <br><chem>[*]:[c](:[*])O[c](:[*])[*]</chem>                   | 0.424        | 1 out of 1                        |
| <b>Top Features for negative contribution</b> |                   |                                                                                                                                                  |              |                                   |
| <b>Fingerprint</b>                            | <b>Bit/Smiles</b> | <b>Feature Structure</b>                                                                                                                         | <b>Score</b> | <b>Carcinogen in training set</b> |
| ECFP_6                                        | 1335691903        | <br><chem>[*][c](:[*]):[c](Cl):[cH]:[*]</chem>                | -0.669       | 3 out of 22                       |
| ECFP_6                                        | 1952889961        | <br><chem>[*]:[c](:[*])C(F)(F)F</chem>                       | -0.657       | 0 out of 3                        |
| ECFP_6                                        | 1336678434        | <br><chem>[*][c](:[*]):[c](:[cH]1:[*])C([*])([*])[*]</chem> | -0.657       | 0 out of 3                        |

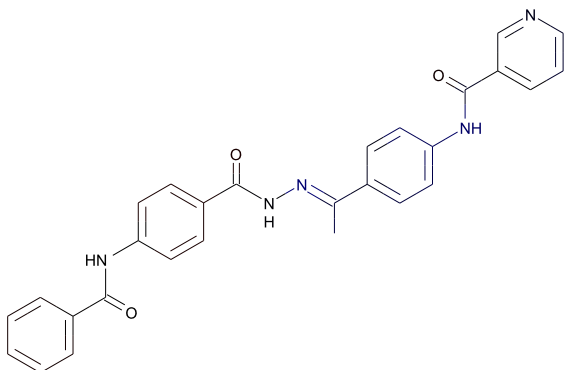

$C_{28}H_{23}N_5O_3$

Molecular Weight: 477.51391

ALogP: 3.082

Rotatable Bonds: 7

Acceptors: 5

Donors: 3

## Model Prediction

Prediction: Single-Carcinogen

Probability: 0.259

Enrichment: 0.633

Bayesian Score: -5.16

Mahalanobis Distance: 12.9

Mahalanobis Distance p-value: 6.51e-005

Prediction: Positive if the Bayesian score is above the estimated best cutoff value from minimizing the false positive and false negative rate.

Probability: The estimated probability that the sample is in the positive category. This assumes that the Bayesian score follows a normal distribution and is different from the prediction using a cutoff.

Enrichment: An estimate of enrichment, that is, the increased likelihood (versus random) of this sample being in the category.

Bayesian Score: The standard Laplacian-modified Bayesian score.

Mahalanobis Distance: The Mahalanobis distance (MD) is the distance to the center of the training data. The larger the MD, the less trustworthy the prediction.

Mahalanobis Distance p-value: The p-value gives the fraction of training data with an MD greater than or equal to the one for the given sample, assuming normally distributed data. The smaller the p-value, the less trustworthy the prediction. For highly non-normal X properties (e.g., fingerprints), the MD p-value is wildly inaccurate.

## Structural Similar Compounds

| Name               | Glimepiride                                                         | Labetalol                                                           | Primidolol                                                          |
|--------------------|---------------------------------------------------------------------|---------------------------------------------------------------------|---------------------------------------------------------------------|
| Structure          |                                                                     |                                                                     |                                                                     |
| Actual Endpoint    | Single-Carcinogen                                                   | Single-Carcinogen                                                   | Single-Carcinogen                                                   |
| Predicted Endpoint | Single-Carcinogen                                                   | Single-Carcinogen                                                   | Single-Carcinogen                                                   |
| Distance           | 0.535                                                               | 0.761                                                               | 0.770                                                               |
| Reference          | US FDA (Centre for Drug Eval.& Res./Off. Testing & Res.) Sept. 1997 | US FDA (Centre for Drug Eval.& Res./Off. Testing & Res.) Sept. 1997 | US FDA (Centre for Drug Eval.& Res./Off. Testing & Res.) Sept. 1997 |

## Model Applicability

Unknown features are fingerprint features in the query molecule, but not found or appearing too infrequently in the training set.

1. All properties and OPS components are within expected ranges.
2. Unknown ECFP\_2 feature: 128986386: [\*]N=C(/C)\[c](:[\*]):[\*]
3. Unknown ECFP\_2 feature: 560380707: [\*]NN=C([\*])[\*]

## Feature Contribution

### Top features for positive contribution

| Fingerprint | Bit/Smiles | Feature Structure                       | Score | Multiple-Carcinogen in training set |
|-------------|------------|-----------------------------------------|-------|-------------------------------------|
| ECFP_4      | -223149939 | <br>[*]NC(=O)[c]1:[cH]:[cH]:[cH]:[cH]:1 | 0.501 | 2 out of 2                          |

|                                               |                   |                                                                                                                                     |              |                                            |
|-----------------------------------------------|-------------------|-------------------------------------------------------------------------------------------------------------------------------------|--------------|--------------------------------------------|
| ECFP_4                                        | -175146122        | 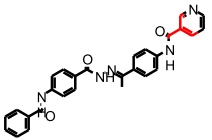<br>[*]C(=[*])[c](:[cH]:[*]):[cH]:[*]            | 0.403        | 6 out of 9                                 |
| ECFP_4                                        | 1430169877        | <br>[*]NC(=O)[c](:[*]):[*]<br>]                  | 0.299        | 2 out of 3                                 |
| <b>Top Features for negative contribution</b> |                   |                                                                                                                                     |              |                                            |
| <b>Fingerprint</b>                            | <b>Bit/Smiles</b> | <b>Feature Structure</b>                                                                                                            | <b>Score</b> | <b>Multiple-Carcinogen in training set</b> |
| ECFP_4                                        | -1087070950       | <br>[*]N=[*]                                     | -1.63        | 0 out of 10                                |
| ECFP_4                                        | 866218936         | <br>[*]C(=[*])C                                | -1.24        | 0 out of 6                                 |
| ECFP_4                                        | 888054369         | <br>[*]N[c]1:[cH]:[*]:[c]<br>([*]):[cH]:[cH]:1 | -0.8         | 0 out of 3                                 |



# Sorafenib

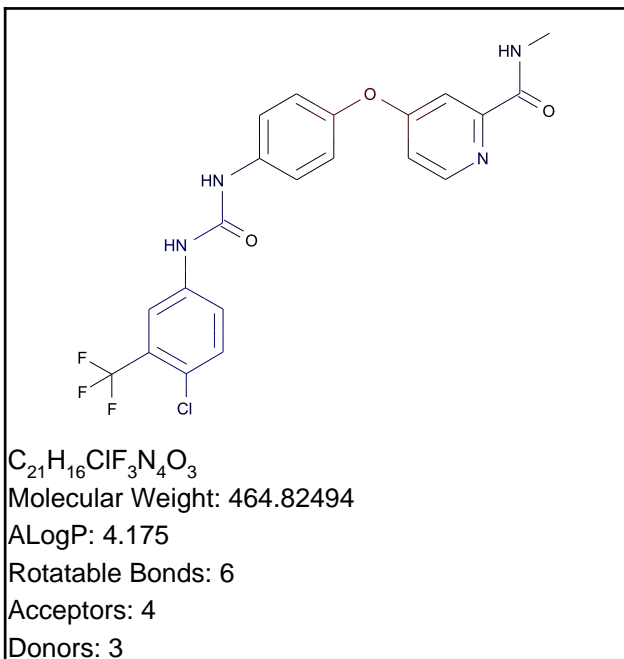

## Model Prediction

Prediction: Single-Carcinogen

Probability: 0.283

Enrichment: 0.691

Bayesian Score: -3.89

Mahalanobis Distance: 11.1

Mahalanobis Distance p-value: 0.00221

Prediction: Positive if the Bayesian score is above the estimated best cutoff value from minimizing the false positive and false negative rate.

Probability: The estimated probability that the sample is in the positive category. This assumes that the Bayesian score follows a normal distribution and is different from the prediction using a cutoff.

Enrichment: An estimate of enrichment, that is, the increased likelihood (versus random) of this sample being in the category.

Bayesian Score: The standard Laplacian-modified Bayesian score.

Mahalanobis Distance: The Mahalanobis distance (MD) is the distance to the center of the training data. The larger the MD, the less trustworthy the prediction.

Mahalanobis Distance p-value: The p-value gives the fraction of training data with an MD greater than or equal to the one for the given sample, assuming normally distributed data. The smaller the p-value, the less trustworthy the prediction. For highly non-normal X properties (e.g., fingerprints), the MD p-value is wildly inaccurate.

# TOPKAT\_Mouse\_Female\_FDA\_Single\_vs\_Multiple

## Structural Similar Compounds

| Name               | Glimepiride                                                                         | Labetalol                                                                           | Lansoprazole                                                                        |
|--------------------|-------------------------------------------------------------------------------------|-------------------------------------------------------------------------------------|-------------------------------------------------------------------------------------|
| Structure          | 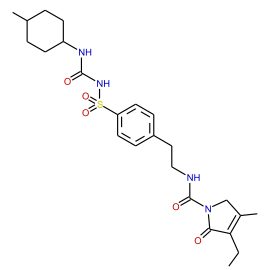 |  |  |
| Actual Endpoint    | Single-Carcinogen                                                                   | Single-Carcinogen                                                                   | Single-Carcinogen                                                                   |
| Predicted Endpoint | Single-Carcinogen                                                                   | Single-Carcinogen                                                                   | Single-Carcinogen                                                                   |
| Distance           | 0.599                                                                               | 0.808                                                                               | 0.820                                                                               |
| Reference          | US FDA (Centre for Drug Eval.& Res./Off. Testing & Res.) Sept. 1997                 | US FDA (Centre for Drug Eval.& Res./Off. Testing & Res.) Sept. 1997                 | US FDA (Centre for Drug Eval.& Res./Off. Testing & Res.) Sept. 1997                 |

## Model Applicability

Unknown features are fingerprint features in the query molecule, but not found or appearing too infrequently in the training set.

1. All properties and OPS components are within expected ranges.
2. Unknown ECFP\_2 feature: 1336678434: [\*][c](:[\*]):[c](C([\*])([\*])([\*])):c:[\*]
3. Unknown ECFP\_2 feature: -1952889961: [\*]:[c](:[\*])C(F)(F)F

## Feature Contribution

### Top features for positive contribution

| Fingerprint | Bit/Smiles | Feature Structure                                                                                                                | Score | Multiple-Carcinogen in training set |
|-------------|------------|----------------------------------------------------------------------------------------------------------------------------------|-------|-------------------------------------|
| ECFP_4      | -834094296 | 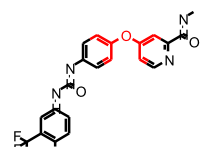<br>[*]:[cH]:[c](O[c](:[c]H):[*]):[c]H):[*] | 0.351 | 1 out of 1                          |



|                                               |                   |                                                                                                                                         |              |                                            |
|-----------------------------------------------|-------------------|-----------------------------------------------------------------------------------------------------------------------------------------|--------------|--------------------------------------------|
| ECFP_4                                        | 1407472008        | 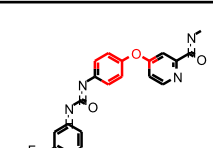<br>[*]:[c](*)O[c]1:[cH]:[cH]:[*]:[cH]:[cH]:1         | 0.351        | 1 out of 1                                 |
| ECFP_4                                        | 143734695         | <br>[*]:[c]1[*]:[cH]:[cH]:[c](O[c](:[*]):[*]):[cH]:1 | 0.351        | 1 out of 1                                 |
| <b>Top Features for negative contribution</b> |                   |                                                                                                                                         |              |                                            |
| <b>Fingerprint</b>                            | <b>Bit/Smiles</b> | <b>Feature Structure</b>                                                                                                                | <b>Score</b> | <b>Multiple-Carcinogen in training set</b> |
| ECFP_4                                        | 1335691903        | <br>[*][c](:[*]):[c](Cl):[cH]:[*]                    | -0.8         | 0 out of 3                                 |
| ECFP_4                                        | 888054369         | <br>[*]N[c]1:[cH]:[*]:[c]([*]):[cH]:[cH]:1         | -0.8         | 0 out of 3                                 |
| ECFP_4                                        | 738938915         | <br>[*]C(=[*])N[c]1:[cH]:[cH]:[*]:[cH]:[cH]:1      | -0.597       | 0 out of 2                                 |



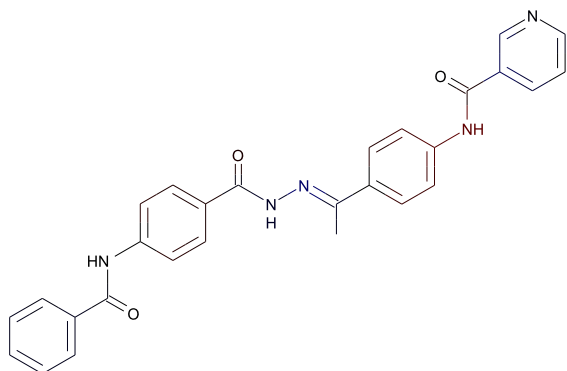

$C_{28}H_{23}N_5O_3$

Molecular Weight: 477.51391

ALogP: 3.082

Rotatable Bonds: 7

Acceptors: 5

Donors: 3

## Model Prediction

**Prediction: Carcinogen**

Probability: 0.266

Enrichment: 0.905

Bayesian Score: -1.56

Mahalanobis Distance: 13.9

Mahalanobis Distance p-value: 1.01e-005

Prediction: Positive if the Bayesian score is above the estimated best cutoff value from minimizing the false positive and false negative rate.

Probability: The estimated probability that the sample is in the positive category. This assumes that the Bayesian score follows a normal distribution and is different from the prediction using a cutoff.

Enrichment: An estimate of enrichment, that is, the increased likelihood (versus random) of this sample being in the category.

Bayesian Score: The standard Laplacian-modified Bayesian score.

Mahalanobis Distance: The Mahalanobis distance (MD) is the distance to the center of the training data. The larger the MD, the less trustworthy the prediction.

Mahalanobis Distance p-value: The p-value gives the fraction of training data with an MD greater than or equal to the one for the given sample, assuming normally distributed data. The smaller the p-value, the less trustworthy the prediction. For highly non-normal X properties (e.g., fingerprints), the MD p-value is wildly inaccurate.

## Structural Similar Compounds

| Name               | Glimepiride                                                         | Glyburide                                                           | Bicalutamide                                                        |
|--------------------|---------------------------------------------------------------------|---------------------------------------------------------------------|---------------------------------------------------------------------|
| Structure          |                                                                     |                                                                     |                                                                     |
| Actual Endpoint    | Carcinogen                                                          | Non-Carcinogen                                                      | Carcinogen                                                          |
| Predicted Endpoint | Carcinogen                                                          | Non-Carcinogen                                                      | Carcinogen                                                          |
| Distance           | 0.538                                                               | 0.581                                                               | 0.612                                                               |
| Reference          | US FDA (Centre for Drug Eval.& Res./Off. Testing & Res.) Sept. 1997 | US FDA (Centre for Drug Eval.& Res./Off. Testing & Res.) Sept. 1997 | US FDA (Centre for Drug Eval.& Res./Off. Testing & Res.) Sept. 1997 |

## Model Applicability

Unknown features are fingerprint features in the query molecule, but not found or appearing too infrequently in the training set.

1. All properties and OPS components are within expected ranges.

## Feature Contribution

### Top features for positive contribution

| Fingerprint | Bit/Smiles | Feature Structure                            | Score | Carcinogen in training set |
|-------------|------------|----------------------------------------------|-------|----------------------------|
| FCFP_6      | -581879738 | <br>[*]NC(=O)[c]1:[cH]:[cH]:[cH]:[cH]:[cH]:1 | 0.77  | 4 out of 5                 |

|                                               |                   |                                                                                                                                      |              |                                   |
|-----------------------------------------------|-------------------|--------------------------------------------------------------------------------------------------------------------------------------|--------------|-----------------------------------|
| FCFP_6                                        | -1838187238       | 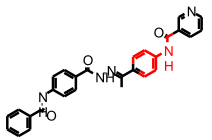<br>[*]C(=[*])N[c]1:[cH]:<br>[cH]:[*]:[cH]:[cH]:1 | 0.565        | 4 out of 7                        |
| FCFP_6                                        | 1294255210        | <br>[*]C(=[*])N[c](:[*]):<br>[*]                  | 0.441        | 12 out of 28                      |
| <b>Top Features for negative contribution</b> |                   |                                                                                                                                      |              |                                   |
| <b>Fingerprint</b>                            | <b>Bit/Smiles</b> | <b>Feature Structure</b>                                                                                                             | <b>Score</b> | <b>Carcinogen in training set</b> |
| FCFP_6                                        | -885520711        | <br>[*]C(=[*])NN=[*]                              | -0.839       | 0 out of 5                        |
| FCFP_6                                        | 1153798395        | <br>[*]C(=[*])[c]1:[cH]:[<br>*]:[cH]:n:[cH]:1    | -0.582       | 0 out of 3                        |
| FCFP_6                                        | -1549192822       | <br>[*]N=C(/C)[c](:[*])<br>:[*]                 | -0.489       | 3 out of 21                       |

# Sorafenib

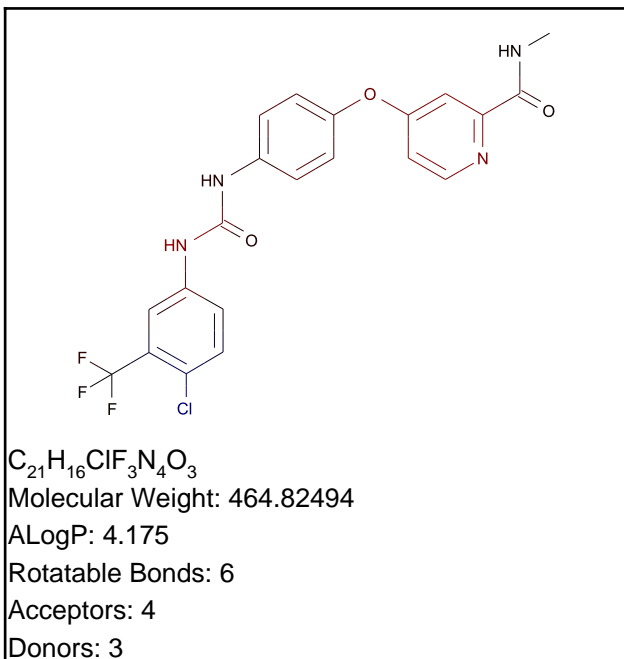

## Model Prediction

Prediction: **Carcinogen**

Probability: 0.444

Enrichment: 1.51

Bayesian Score: 4.21

Mahalanobis Distance: 20.3

Mahalanobis Distance p-value: 1.28e-019

Prediction: Positive if the Bayesian score is above the estimated best cutoff value from minimizing the false positive and false negative rate.

Probability: The estimated probability that the sample is in the positive category. This assumes that the Bayesian score follows a normal distribution and is different from the prediction using a cutoff.

Enrichment: An estimate of enrichment, that is, the increased likelihood (versus random) of this sample being in the category.

Bayesian Score: The standard Laplacian-modified Bayesian score.

Mahalanobis Distance: The Mahalanobis distance (MD) is the distance to the center of the training data. The larger the MD, the less trustworthy the prediction.

Mahalanobis Distance p-value: The p-value gives the fraction of training data with an MD greater than or equal to the one for the given sample, assuming normally distributed data. The smaller the p-value, the less trustworthy the prediction. For highly non-normal X properties (e.g., fingerprints), the MD p-value is wildly inaccurate.

# TOPKAT\_Mouse\_Male\_FDA\_None\_vs\_Carcinogen

## Structural Similar Compounds

| Name               | Glyburide                                                                           | Glimepiride                                                                         | Fluvastatin                                                                         |
|--------------------|-------------------------------------------------------------------------------------|-------------------------------------------------------------------------------------|-------------------------------------------------------------------------------------|
| Structure          | 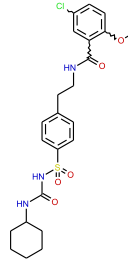 |  |  |
| Actual Endpoint    | Non-Carcinogen                                                                      | Carcinogen                                                                          | Non-Carcinogen                                                                      |
| Predicted Endpoint | Non-Carcinogen                                                                      | Carcinogen                                                                          | Non-Carcinogen                                                                      |
| Distance           | 0.594                                                                               | 0.599                                                                               | 0.603                                                                               |
| Reference          | US FDA (Centre for Drug Eval.& Res./Off. Testing & Res.) Sept. 1997                 | US FDA (Centre for Drug Eval.& Res./Off. Testing & Res.) Sept. 1997                 | US FDA (Centre for Drug Eval.& Res./Off. Testing & Res.) Sept. 1997                 |

## Model Applicability

Unknown features are fingerprint features in the query molecule, but not found or appearing too infrequently in the training set.

1. All properties and OPS components are within expected ranges.

## Feature Contribution

### Top features for positive contribution

| Fingerprint | Bit/Smiles | Feature Structure                                                                                        | Score | Carcinogen in training set |
|-------------|------------|----------------------------------------------------------------------------------------------------------|-------|----------------------------|
| FCFP_6      | 71953198   | 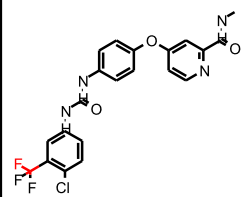<br>[*]C([*])([*])F | 0.612 | 12 out of 23               |

|                                               |                   |                                                                                                                                               |              |                                   |
|-----------------------------------------------|-------------------|-----------------------------------------------------------------------------------------------------------------------------------------------|--------------|-----------------------------------|
| FCFP_6                                        | -1838187238       | 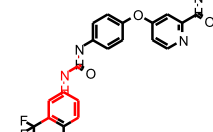<br>[*]C(=[*])N[c]1:[cH]:<br>[cH]:[*]:[cH]:[cH]:1          | 0.565        | 4 out of 7                        |
| FCFP_6                                        | 140656626         | <br>[*]O[c]1:[cH]:[cH]:n:<br>[c](:[cH]:1)C(=[*])[<br>*]    | 0.46         | 1 out of 1                        |
| <b>Top Features for negative contribution</b> |                   |                                                                                                                                               |              |                                   |
| <b>Fingerprint</b>                            | <b>Bit/Smiles</b> | <b>Feature Structure</b>                                                                                                                      | <b>Score</b> | <b>Carcinogen in training set</b> |
| FCFP_6                                        | 2104062943        | <br>[*]C(=[*])([*])[c]1:[c<br>H]:[*]:[cH]:[cH]:[c]<br>:1Cl | -1.01        | 1 out of 17                       |
| FCFP_6                                        | 551850122         | <br>[*][c]1:[*]:[c]([*]):<br>[c](Cl):[cH]:[cH]:1          | -0.433       | 8 out of 49                       |
| FCFP_6                                        | 71476542          | <br>[*]:[c](:[*])Cl                                      | -0.406       | 10 out of 59                      |

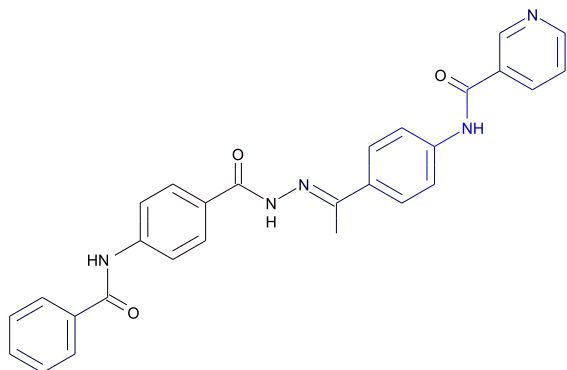
 $C_{28}H_{23}N_5O_3$ 

Molecular Weight: 477.51391

ALogP: 3.082

Rotatable Bonds: 7

Acceptors: 5

Donors: 3

## Model Prediction

Prediction: Single-Carcinogen

Probability: 0.151

Enrichment: 0.503

Bayesian Score: -11.8

Mahalanobis Distance: 15.6

Mahalanobis Distance p-value: 9.06e-007

Prediction: Positive if the Bayesian score is above the estimated best cutoff value from minimizing the false positive and false negative rate.

Probability: The estimated probability that the sample is in the positive category. This assumes that the Bayesian score follows a normal distribution and is different from the prediction using a cutoff.

Enrichment: An estimate of enrichment, that is, the increased likelihood (versus random) of this sample being in the category.

Bayesian Score: The standard Laplacian-modified Bayesian score.

Mahalanobis Distance: The Mahalanobis distance (MD) is the distance to the center of the training data. The larger the MD, the less trustworthy the prediction.

Mahalanobis Distance p-value: The p-value gives the fraction of training data with an MD greater than or equal to the one for the given sample, assuming normally distributed data. The smaller the p-value, the less trustworthy the prediction. For highly non-normal X properties (e.g., fingerprints), the MD p-value is wildly inaccurate.

## Structural Similar Compounds

| Name               | Glimepiride                                                         | Bicalutamide                                                        | Primidolol                                                          |
|--------------------|---------------------------------------------------------------------|---------------------------------------------------------------------|---------------------------------------------------------------------|
| Structure          |                                                                     |                                                                     |                                                                     |
| Actual Endpoint    | Single-Carcinogen                                                   | Single-Carcinogen                                                   | Single-Carcinogen                                                   |
| Predicted Endpoint | Single-Carcinogen                                                   | Single-Carcinogen                                                   | Single-Carcinogen                                                   |
| Distance           | 0.551                                                               | 0.682                                                               | 0.795                                                               |
| Reference          | US FDA (Centre for Drug Eval.& Res./Off. Testing & Res.) Sept. 1997 | US FDA (Centre for Drug Eval.& Res./Off. Testing & Res.) Sept. 1997 | US FDA (Centre for Drug Eval.& Res./Off. Testing & Res.) Sept. 1997 |

## Model Applicability

Unknown features are fingerprint features in the query molecule, but not found or appearing too infrequently in the training set.

1. All properties and OPS components are within expected ranges.
2. Unknown FCFP\_2 feature: 581019816: [\*]NN=C([\*])[\*]
3. Unknown FCFP\_2 feature: -885520711: [\*]C(=[\*])NN=[\*]

## Feature Contribution

### Top features for positive contribution

| Fingerprint | Bit/Smiles | Feature Structure                      | Score | Multiple-Carcinogen in training set |
|-------------|------------|----------------------------------------|-------|-------------------------------------|
| FCFP_12     | 547884906  | <br>[*][c]1:[*]:[cH]:[cH]<br>:n:[cH]:1 | 0.4   | 1 out of 1                          |

|                                               |                   |                                                                                                                                                 |              |                                            |
|-----------------------------------------------|-------------------|-------------------------------------------------------------------------------------------------------------------------------------------------|--------------|--------------------------------------------|
| FCFP_12                                       | -581879738        | 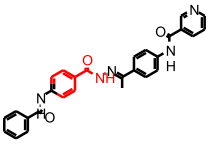<br><chem>[*]NC(=O)[c]1:[cH]:[cH]:[*]:[cH]:[cH]:1</chem>     | 0.239        | 2 out of 4                                 |
| FCFP_12                                       | -1549103449       | <br><chem>[*]NC(=O)[c](:[*]):[*]<br/>]</chem>                | 0.168        | 3 out of 7                                 |
| <b>Top Features for negative contribution</b> |                   |                                                                                                                                                 |              |                                            |
| <b>Fingerprint</b>                            | <b>Bit/Smiles</b> | <b>Feature Structure</b>                                                                                                                        | <b>Score</b> | <b>Multiple-Carcinogen in training set</b> |
| FCFP_12                                       | 1294255210        | <br><chem>[*]C(=[*])N[c](:[*]):[*]</chem>                    | -1.63        | 0 out of 12                                |
| FCFP_12                                       | 590925877         | <br><chem>[*]N[c](:[cH]:[*]):[cH]:[*]</chem>               | -0.998       | 1 out of 13                                |
| FCFP_12                                       | -1838187238       | <br><chem>[*]C(=[*])N[c]1:[cH]:[cH]:[*]:[cH]:[cH]:1</chem> | -0.859       | 0 out of 4                                 |





# Sorafenib

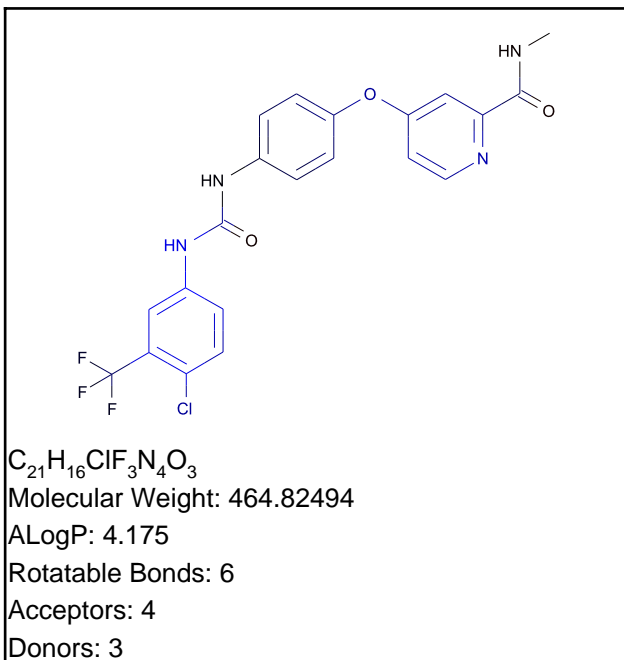

## Model Prediction

Prediction: Single-Carcinogen

Probability: 0.139

Enrichment: 0.461

Bayesian Score: -14.7

Mahalanobis Distance: 21.3

Mahalanobis Distance p-value: 4.93e-011

Prediction: Positive if the Bayesian score is above the estimated best cutoff value from minimizing the false positive and false negative rate.

Probability: The estimated probability that the sample is in the positive category. This assumes that the Bayesian score follows a normal distribution and is different from the prediction using a cutoff.

Enrichment: An estimate of enrichment, that is, the increased likelihood (versus random) of this sample being in the category.

Bayesian Score: The standard Laplacian-modified Bayesian score.

Mahalanobis Distance: The Mahalanobis distance (MD) is the distance to the center of the training data. The larger the MD, the less trustworthy the prediction.

Mahalanobis Distance p-value: The p-value gives the fraction of training data with an MD greater than or equal to the one for the given sample, assuming normally distributed data. The smaller the p-value, the less trustworthy the prediction. For highly non-normal X properties (e.g., fingerprints), the MD p-value is wildly inaccurate.

# TOPKAT\_Mouse\_Male\_FDA\_Single\_vs\_Multiple

## Structural Similar Compounds

| Name               | Glimepiride                                                                         | Bicalutamide                                                                        | Lansoprazole                                                                        |
|--------------------|-------------------------------------------------------------------------------------|-------------------------------------------------------------------------------------|-------------------------------------------------------------------------------------|
| Structure          | 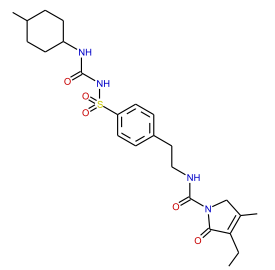 |  |  |
| Actual Endpoint    | Single-Carcinogen                                                                   | Single-Carcinogen                                                                   | Single-Carcinogen                                                                   |
| Predicted Endpoint | Single-Carcinogen                                                                   | Single-Carcinogen                                                                   | Single-Carcinogen                                                                   |
| Distance           | 0.626                                                                               | 0.700                                                                               | 0.866                                                                               |
| Reference          | US FDA (Centre for Drug Eval.& Res./Off. Testing & Res.) Sept. 1997                 | US FDA (Centre for Drug Eval.& Res./Off. Testing & Res.) Sept. 1997                 | US FDA (Centre for Drug Eval.& Res./Off. Testing & Res.) Sept. 1997                 |

## Model Applicability

Unknown features are fingerprint features in the query molecule, but not found or appearing too infrequently in the training set.

- All properties and OPS components are within expected ranges.

## Feature Contribution

### Top features for positive contribution

| Fingerprint | Bit/Smiles | Feature Structure                                                                                      | Score | Multiple-Carcinogen in training set |
|-------------|------------|--------------------------------------------------------------------------------------------------------|-------|-------------------------------------|
| FCFP_12     | 1499521844 | 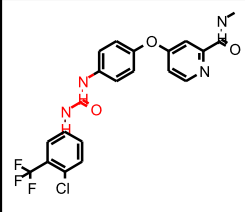<br>[*]NC(=O)N[*] | 0.39  | 5 out of 9                          |

|                                               |                   |                                                                                                                                    |              |                                            |
|-----------------------------------------------|-------------------|------------------------------------------------------------------------------------------------------------------------------------|--------------|--------------------------------------------|
| FCFP_12                                       | -904785030        | 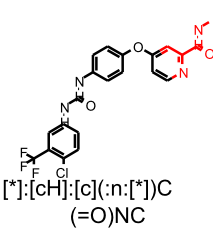<br>[*]:[cH]:[c](:n:[*])C<br>(=O)NC              | 0.174        | 1 out of 2                                 |
| FCFP_12                                       | -1549103449       | <br>[*]NC(=O)[c](:[*]):[*]<br>]                 | 0.168        | 3 out of 7                                 |
| <b>Top Features for negative contribution</b> |                   |                                                                                                                                    |              |                                            |
| <b>Fingerprint</b>                            | <b>Bit/Smiles</b> | <b>Feature Structure</b>                                                                                                           | <b>Score</b> | <b>Multiple-Carcinogen in training set</b> |
| FCFP_12                                       | 1294255210        | <br>[*]C(=[*])N[c](:[*]):<br>[*]                | -1.63        | 0 out of 12                                |
| FCFP_12                                       | 590925877         | <br>[*]N[c](:[cH]:[*]):[c<br>H]:[*]           | -0.998       | 1 out of 13                                |
| FCFP_12                                       | -1462709112       | <br>[*]C(=[*])[c]1:[cH]:[<br>*]:[cH]:[cH]:n:1 | -0.994       | 0 out of 5                                 |



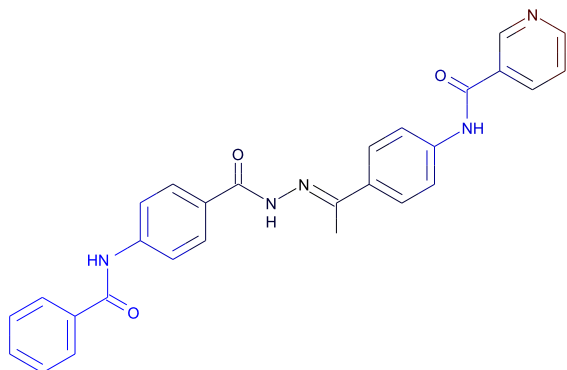

$C_{28}H_{23}N_5O_3$

Molecular Weight: 477.51391

ALogP: 3.082

Rotatable Bonds: 7

Acceptors: 5

Donors: 3

## Model Prediction

Prediction: Mild

Probability: 0.132

Enrichment: 0.191

Bayesian Score: -10.3

Mahalanobis Distance: 7.9

Mahalanobis Distance p-value: 0.942

Prediction: Positive if the Bayesian score is above the estimated best cutoff value from minimizing the false positive and false negative rate.

Probability: The estimated probability that the sample is in the positive category. This assumes that the Bayesian score follows a normal distribution and is different from the prediction using a cutoff.

Enrichment: An estimate of enrichment, that is, the increased likelihood (versus random) of this sample being in the category.

Bayesian Score: The standard Laplacian-modified Bayesian score.

Mahalanobis Distance: The Mahalanobis distance (MD) is the distance to the center of the training data. The larger the MD, the less trustworthy the prediction.

Mahalanobis Distance p-value: The p-value gives the fraction of training data with an MD greater than or equal to the one for the given sample, assuming normally distributed data. The smaller the p-value, the less trustworthy the prediction. For highly non-normal X properties (e.g., fingerprints), the MD p-value is wildly inaccurate.

## Structural Similar Compounds

| Name               | 4;4'-DIAMINO-1;1'-DIANTHRIMIDE | 1-AMINO-4-BENZOYLAMINO-ANTHRAQUINONE | ANTHRAQUINONE; 1-((2-HYDROXYETHYL)AMINO)-4-(METHYLAMINO)- |
|--------------------|--------------------------------|--------------------------------------|-----------------------------------------------------------|
| Structure          |                                |                                      |                                                           |
| Actual Endpoint    | Mild                           | Mild                                 | Mild                                                      |
| Predicted Endpoint | Mild                           | Mild                                 | Mild                                                      |
| Distance           | 0.724                          | 0.783                                | 0.796                                                     |
| Reference          | 28ZPAK-;125;72                 | 28ZPAK-;124;72                       | 28ZPAK 245;72                                             |

## Model Applicability

Unknown features are fingerprint features in the query molecule, but not found or appearing too infrequently in the training set.

- All properties and OPS components are within expected ranges.
- Unknown FCFP\_2 feature: 581019816: [\*]NN=C([\*])[\*]

## Feature Contribution

### Top features for positive contribution

| Fingerprint | Bit/Smiles | Feature Structure                  | Score | Moderate_Severe in training set |
|-------------|------------|------------------------------------|-------|---------------------------------|
| FCFP_10     | 547884906  | <br>[*][c]1:[*]:[cH]:[cH]:n:[cH]:1 | 0.317 | 4 out of 4                      |

|                                               |                   |                                                                                                                                                              |              |                                            |
|-----------------------------------------------|-------------------|--------------------------------------------------------------------------------------------------------------------------------------------------------------|--------------|--------------------------------------------|
| FCFP_10                                       | -1695756380       | 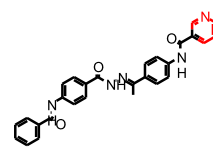<br>[*]1:[cH]:[cH]:[cH]:n<br>:[cH]:1                                      | 0.285        | 10 out of 11                               |
| FCFP_10                                       | -124655670        | <br>[*]:[cH]:[cH]:n:[*]                                                   | 0.259        | 14 out of 16                               |
| <b>Top Features for negative contribution</b> |                   |                                                                                                                                                              |              |                                            |
| <b>Fingerprint</b>                            | <b>Bit/Smiles</b> | <b>Feature Structure</b>                                                                                                                                     | <b>Score</b> | <b>Moderate_Severe<br/>in training set</b> |
| FCFP_10                                       | -1925475824       | <br>[*]:[cH]:[c](:[cH]):[*]<br>])C(=O)N[c](:[*]):[*]<br>]                 | -1.29        | 0 out of 4                                 |
| FCFP_10                                       | 241406177         | <br>[*]:[cH]:[c](NC(=O)[c]<br>1:[cH]:[cH]:[*]:[cH]<br>):[cH]:1):[cH]:[*] | -1.29        | 0 out of 4                                 |
| FCFP_10                                       | -581879738        | <br>[*]NC(=O)[c]1:[cH]:[c]<br>H]:[*]:[cH]:[cH]:1                        | -1.29        | 0 out of 4                                 |

# Sorafenib

# TOPKAT\_Ocular\_Irritancy\_Mild\_vs\_Moderate\_Severe

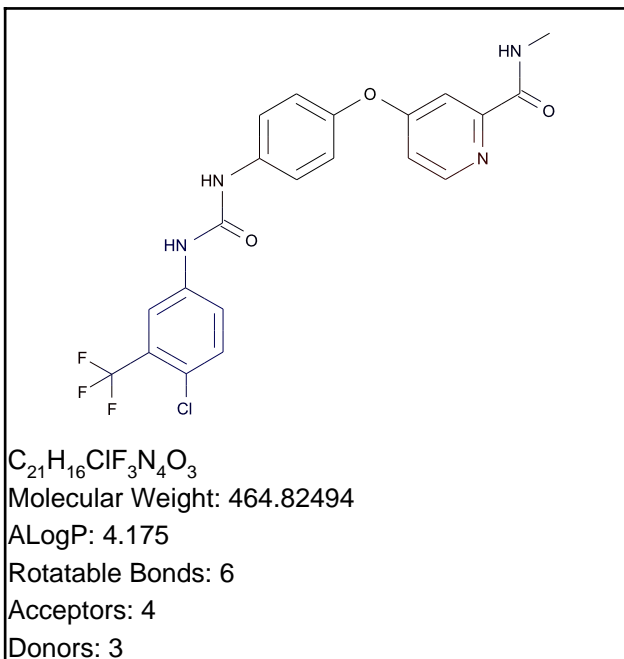

## Model Prediction

Prediction: Mild

Probability: 0.776

Enrichment: 1.13

Bayesian Score: -1.8

Mahalanobis Distance: 8.95

Mahalanobis Distance p-value: 0.537

Prediction: Positive if the Bayesian score is above the estimated best cutoff value from minimizing the false positive and false negative rate.

Probability: The estimated probability that the sample is in the positive category. This assumes that the Bayesian score follows a normal distribution and is different from the prediction using a cutoff.

Enrichment: An estimate of enrichment, that is, the increased likelihood (versus random) of this sample being in the category.

Bayesian Score: The standard Laplacian-modified Bayesian score.

Mahalanobis Distance: The Mahalanobis distance (MD) is the distance to the center of the training data. The larger the MD, the less trustworthy the prediction.

Mahalanobis Distance p-value: The p-value gives the fraction of training data with an MD greater than or equal to the one for the given sample, assuming normally distributed data. The smaller the p-value, the less trustworthy the prediction. For highly non-normal X properties (e.g., fingerprints), the MD p-value is wildly inaccurate.

## Structural Similar Compounds

| Name               | 4;4'-DIAMINO-1;1'-DIANTHRIMIDE                                                      | 5-NORBORNENE-2;3-DICARBOXYLIC ACID; 1;4;5;6;7;7-HEXACHLORO-                         | METHANE;TRIS(4-AMINOPHENYL)-                                                        |
|--------------------|-------------------------------------------------------------------------------------|-------------------------------------------------------------------------------------|-------------------------------------------------------------------------------------|
| Structure          | 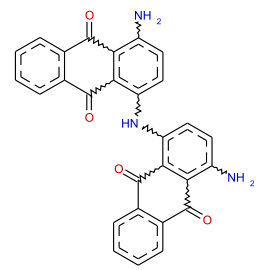 |  |  |
| Actual Endpoint    | Mild                                                                                | Moderate_Severe                                                                     | Moderate_Severe                                                                     |
| Predicted Endpoint | Mild                                                                                | Moderate_Severe                                                                     | Moderate_Severe                                                                     |
| Distance           | 0.799                                                                               | 0.816                                                                               | 0.827                                                                               |
| Reference          | 28ZPAK-;125;72                                                                      | 28ZPAK-;92;72                                                                       | 28ZPAK-;73;72                                                                       |

## Model Applicability

Unknown features are fingerprint features in the query molecule, but not found or appearing too infrequently in the training set.

- All properties and OPS components are within expected ranges.

## Feature Contribution

### Top features for positive contribution

| Fingerprint | Bit/Smiles  | Feature Structure                                                                                                         | Score | Moderate_Severe in training set |
|-------------|-------------|---------------------------------------------------------------------------------------------------------------------------|-------|---------------------------------|
| FCFP_10     | -1695756380 | 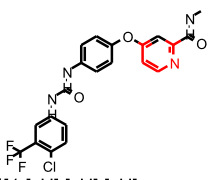<br>[*]1:[cH]:[cH]:[cH]:n<br>:[cH]:1 | 0.285 | 10 out of 11                    |

|                                               |                   |                                                                                                                                                             |              |                                        |
|-----------------------------------------------|-------------------|-------------------------------------------------------------------------------------------------------------------------------------------------------------|--------------|----------------------------------------|
| FCFP_10                                       | -124655670        | 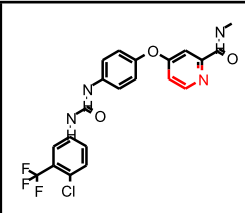<br><chem>[*]:[cH]:[cH]:n:[*]</chem>                                      | 0.259        | 14 out of 16                           |
| FCFP_10                                       | -885550502        | <br><chem>[*]C(=[*])NC</chem>                                            | 0.239        | 54 out of 64                           |
| <b>Top Features for negative contribution</b> |                   |                                                                                                                                                             |              |                                        |
| <b>Fingerprint</b>                            | <b>Bit/Smiles</b> | <b>Feature Structure</b>                                                                                                                                    | <b>Score</b> | <b>Moderate_Severe in training set</b> |
| FCFP_10                                       | 2104062943        | <br><chem>[*]C([*])([*])[c]1:[cH]:[*]:[cH]:[cH]:[c]:1Cl</chem>           | -0.745       | 7 out of 24                            |
| FCFP_10                                       | -174293376        | <br><chem>[*]N([c]([cH]:[cH]:[c](Cl):[c](-[cH]:1)C([*])([*])[*])</chem> | -0.507       | 0 out of 1                             |
| FCFP_10                                       | -1549103449       | <br><chem>[*]NC(=O)[c]([*]):[*]</chem>                                 | -0.504       | 2 out of 6                             |



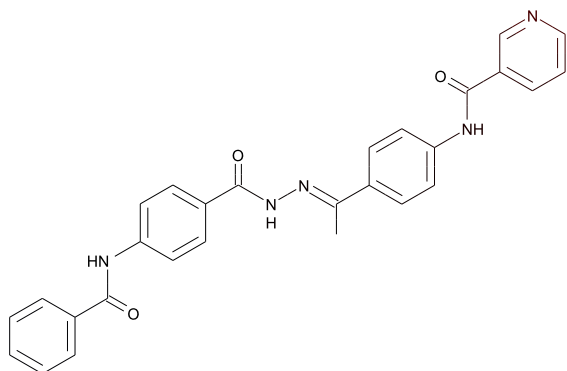

$C_{28}H_{23}N_5O_3$

Molecular Weight: 477.51391

ALogP: 3.082

Rotatable Bonds: 7

Acceptors: 5

Donors: 3

## Model Prediction

**Prediction: Irritant**

Probability: 1

Enrichment: 1.18

Bayesian Score: 1.72

Mahalanobis Distance: 7.1

Mahalanobis Distance p-value: 0.997

Prediction: Positive if the Bayesian score is above the estimated best cutoff value from minimizing the false positive and false negative rate.

Probability: The estimated probability that the sample is in the positive category. This assumes that the Bayesian score follows a normal distribution and is different from the prediction using a cutoff.

Enrichment: An estimate of enrichment, that is, the increased likelihood (versus random) of this sample being in the category.

Bayesian Score: The standard Laplacian-modified Bayesian score.

Mahalanobis Distance: The Mahalanobis distance (MD) is the distance to the center of the training data. The larger the MD, the less trustworthy the prediction.

Mahalanobis Distance p-value: The p-value gives the fraction of training data with an MD greater than or equal to the one for the given sample, assuming normally distributed data. The smaller the p-value, the less trustworthy the prediction. For highly non-normal X properties (e.g., fingerprints), the MD p-value is wildly inaccurate.

## Structural Similar Compounds

| Name               | 4;4'-DIAMINO-1;1'-DIANTHRIMIDE | ANTHRAQUINONE; 1-((2-HYDROXYETHYL)AMINO)-4-(METHYLAMINO)- | 1-AMINO-4-BENZOYLAMINO-ANTHRAQUINONE |
|--------------------|--------------------------------|-----------------------------------------------------------|--------------------------------------|
| Structure          |                                |                                                           |                                      |
| Actual Endpoint    | Irritant                       | Irritant                                                  | Irritant                             |
| Predicted Endpoint | Irritant                       | Irritant                                                  | Irritant                             |
| Distance           | 0.716                          | 0.780                                                     | 0.781                                |
| Reference          | 28ZPAK-;125;72                 | 28ZPAK 245;72                                             | 28ZPAK-;124;72                       |

## Model Applicability

Unknown features are fingerprint features in the query molecule, but not found or appearing too infrequently in the training set.

- All properties and OPS components are within expected ranges.
- Unknown FCFP\_2 feature: 581019816: [\*]NN=C([\*])[\*]

## Feature Contribution

### Top features for positive contribution

| Fingerprint | Bit/Smiles | Feature Structure       | Score | Irritant in training set |
|-------------|------------|-------------------------|-------|--------------------------|
| FCFP_12     | 1747237384 | <br>[*]:[cH]:n:[cH]:[*] | 0.208 | 44 out of 44             |

|                                               |                   |                                                                                                                                       |              |                                 |
|-----------------------------------------------|-------------------|---------------------------------------------------------------------------------------------------------------------------------------|--------------|---------------------------------|
| FCFP_12                                       | -124655670        | 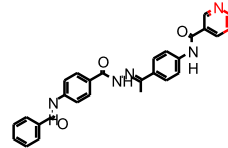<br>[*]:[cH]:[cH]:n:[*]                            | 0.2          | 16 out of 16                    |
| FCFP_12                                       | -1695756380       | <br>[*]1:[cH]:[cH]:[cH]:n<br>:[cH]:1               | 0.194        | 11 out of 11                    |
| <b>Top Features for negative contribution</b> |                   |                                                                                                                                       |              |                                 |
| <b>Fingerprint</b>                            | <b>Bit/Smiles</b> | <b>Feature Structure</b>                                                                                                              | <b>Score</b> | <b>Irritant in training set</b> |
| FCFP_12                                       | -1698724694       | <br>[*]C(=[*])[c]1:[cH]:[cH]:[cH]:[cH]:[cH]:[cH]:1 | -0.0964      | 107 out of 146                  |
| FCFP_12                                       | 1                 | <br>[*]N=[*]                                      | 0            | 872 out of 1051                 |
| FCFP_12                                       | 0                 | <br>[*]C(=[*])[*]                                | 0            | 1184 out of 1397                |

# Sorafenib

# TOPKAT\_Ocular\_Irritancy\_None\_vs\_Irritant

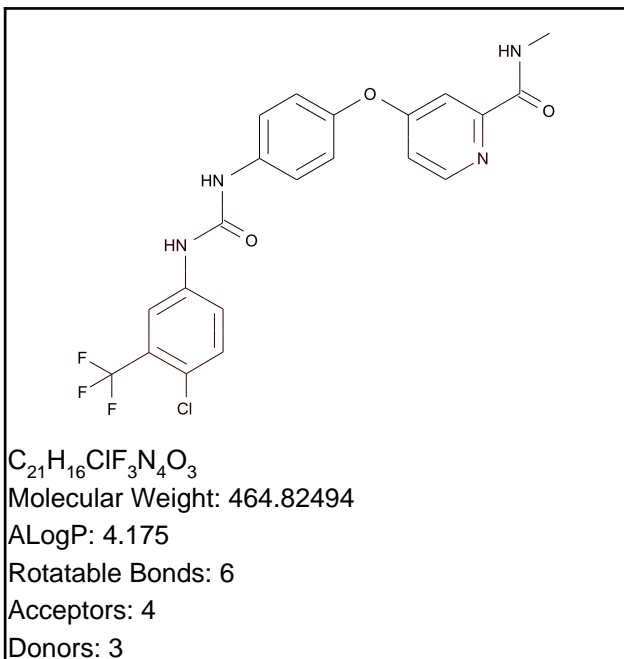

## Model Prediction

Prediction: Irritant

Probability: 1

Enrichment: 1.18

Bayesian Score: 3.04

Mahalanobis Distance: 6.28

Mahalanobis Distance p-value: 1

Prediction: Positive if the Bayesian score is above the estimated best cutoff value from minimizing the false positive and false negative rate.

Probability: The estimated probability that the sample is in the positive category. This assumes that the Bayesian score follows a normal distribution and is different from the prediction using a cutoff.

Enrichment: An estimate of enrichment, that is, the increased likelihood (versus random) of this sample being in the category.

Bayesian Score: The standard Laplacian-modified Bayesian score.

Mahalanobis Distance: The Mahalanobis distance (MD) is the distance to the center of the training data. The larger the MD, the less trustworthy the prediction.

Mahalanobis Distance p-value: The p-value gives the fraction of training data with an MD greater than or equal to the one for the given sample, assuming normally distributed data. The smaller the p-value, the less trustworthy the prediction. For highly non-normal X properties (e.g., fingerprints), the MD p-value is wildly inaccurate.

## Structural Similar Compounds

| Name               | BENZANILIDE;2';2'''-DITHIOBIS-                                                      | 4;4'-DIAMINO-1;1'-DIANTHRIMIDE                                                      | 5-NORBORNENE-2;3-DICARBOXYLIC ACID;1;4;5;6;7;7'-HEXACHLORO-                         |
|--------------------|-------------------------------------------------------------------------------------|-------------------------------------------------------------------------------------|-------------------------------------------------------------------------------------|
| Structure          | 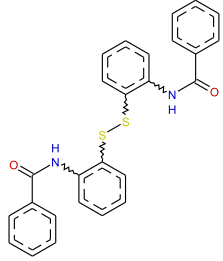 |  |  |
| Actual Endpoint    | Non-Irritant                                                                        | Irritant                                                                            | Irritant                                                                            |
| Predicted Endpoint | Non-Irritant                                                                        | Irritant                                                                            | Irritant                                                                            |
| Distance           | 0.743                                                                               | 0.791                                                                               | 0.801                                                                               |
| Reference          | 28ZPAK-;173;72                                                                      | 28ZPAK-;125;72                                                                      | 28ZPAK-;92;72                                                                       |

## Model Applicability

Unknown features are fingerprint features in the query molecule, but not found or appearing too infrequently in the training set.

- All properties and OPS components are within expected ranges.

## Feature Contribution

### Top features for positive contribution

| Fingerprint | Bit/Smiles | Feature Structure                                                                                            | Score | Irritant in training set |
|-------------|------------|--------------------------------------------------------------------------------------------------------------|-------|--------------------------|
| FCFP_12     | 1747237384 | 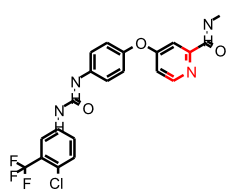<br>[*]:[cH]:n:[cH]:[*] | 0.208 | 44 out of 44             |

|                                               |                   |                                                                                                                                                                               |              |                                 |
|-----------------------------------------------|-------------------|-------------------------------------------------------------------------------------------------------------------------------------------------------------------------------|--------------|---------------------------------|
| FCFP_12                                       | -124655670        | 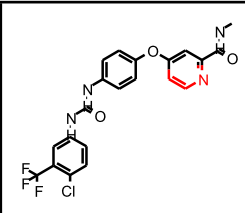<br><chem>[*]:[cH]:[cH]:n:[*]</chem>                                                        | 0.2          | 16 out of 16                    |
| FCFP_12                                       | -1539132615       | <br><chem>[*]C(=[*])[c](-[cH]:[*]):n:[*]</chem>                                            | 0.197        | 13 out of 13                    |
| <b>Top Features for negative contribution</b> |                   |                                                                                                                                                                               |              |                                 |
| <b>Fingerprint</b>                            | <b>Bit/Smiles</b> | <b>Feature Structure</b>                                                                                                                                                      | <b>Score</b> | <b>Irritant in training set</b> |
| FCFP_12                                       | -747629521        | <br><chem>[*]N([c]([cH]:[cH]:[c](O[c](-[*]):[*]):[cH]:[cH]:1</chem>                        | -0.268       | 1 out of 2                      |
| FCFP_12                                       | 702861189         | <br><chem>[*]N([c]([cH]:[cH]:[c](O[c]2:[cH]:[cH]:[*]):[c]([*]):[cH]:2):[cH]:[cH]:1</chem> | -0.268       | 1 out of 2                      |
| FCFP_12                                       | 859018953         | <br><chem>[*][c]1:[cH]:[cH]:[c](O[c](-[cH]:[*]):[cH]:[*]):[cH]:[cH]:1</chem>             | 0            | 7 out of 9                      |

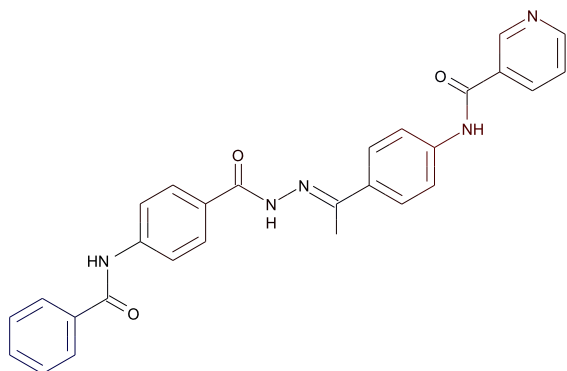

$C_{28}H_{23}N_5O_3$

Molecular Weight: 477.51391

ALogP: 3.082

Rotatable Bonds: 7

Acceptors: 5

Donors: 3

## Model Prediction

Prediction: **Carcinogen**

Probability: 0.296

Enrichment: 0.92

Bayesian Score: -0.121

Mahalanobis Distance: 12

Mahalanobis Distance p-value: 0.00462

Prediction: Positive if the Bayesian score is above the estimated best cutoff value from minimizing the false positive and false negative rate.

Probability: The estimated probability that the sample is in the positive category. This assumes that the Bayesian score follows a normal distribution and is different from the prediction using a cutoff.

Enrichment: An estimate of enrichment, that is, the increased likelihood (versus random) of this sample being in the category.

Bayesian Score: The standard Laplacian-modified Bayesian score.

Mahalanobis Distance: The Mahalanobis distance (MD) is the distance to the center of the training data. The larger the MD, the less trustworthy the prediction.

Mahalanobis Distance p-value: The p-value gives the fraction of training data with an MD greater than or equal to the one for the given sample, assuming normally distributed data. The smaller the p-value, the less trustworthy the prediction. For highly non-normal X properties (e.g., fingerprints), the MD p-value is wildly inaccurate.

## Structural Similar Compounds

| Name               | Glimepiride                                                         | Glyburide                                                           | Glipizide                                                           |
|--------------------|---------------------------------------------------------------------|---------------------------------------------------------------------|---------------------------------------------------------------------|
| Structure          |                                                                     |                                                                     |                                                                     |
| Actual Endpoint    | Non-Carcinogen                                                      | Non-Carcinogen                                                      | Non-Carcinogen                                                      |
| Predicted Endpoint | Non-Carcinogen                                                      | Non-Carcinogen                                                      | Non-Carcinogen                                                      |
| Distance           | 0.562                                                               | 0.603                                                               | 0.656                                                               |
| Reference          | US FDA (Centre for Drug Eval.& Res./Off. Testing & Res.) Sept. 1997 | US FDA (Centre for Drug Eval.& Res./Off. Testing & Res.) Sept. 1997 | US FDA (Centre for Drug Eval.& Res./Off. Testing & Res.) Sept. 1997 |

## Model Applicability

Unknown features are fingerprint features in the query molecule, but not found or appearing too infrequently in the training set.

1. All properties and OPS components are within expected ranges.
2. Unknown ECFP\_2 feature: 128986386: [\*]N=C(/C)\[c](:[\*]):[\*]

## Feature Contribution

### Top features for positive contribution

| Fingerprint | Bit/Smiles | Feature Structure                           | Score | Carcinogen in training set |
|-------------|------------|---------------------------------------------|-------|----------------------------|
| ECFP_12     | 223149939  | <br>[*]NC(=O)[c]1:[cH]:[cH]:[*]:[cH]:[cH]:1 | 0.613 | 2 out of 2                 |

|                                               |                   |                                                                                                                                              |              |                                   |
|-----------------------------------------------|-------------------|----------------------------------------------------------------------------------------------------------------------------------------------|--------------|-----------------------------------|
| ECFP_12                                       | -177077903        | 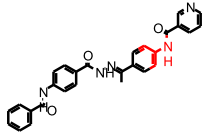<br><chem>[*]N[c](:[cH]:[*]):[cH]:[*]</chem>              | 0.529        | 6 out of 10                       |
| ECFP_12                                       | -1236483485       | <br><chem>[*]C(=[*])N[c](:[*]):[*]</chem>                 | 0.46         | 9 out of 17                       |
| <b>Top Features for negative contribution</b> |                   |                                                                                                                                              |              |                                   |
| <b>Fingerprint</b>                            | <b>Bit/Smiles</b> | <b>Feature Structure</b>                                                                                                                     | <b>Score</b> | <b>Carcinogen in training set</b> |
| ECFP_12                                       | 1571214559        | <br><chem>[*]1:[cH]:[cH]:[cH]:[cH]:[cH]:[cH]:1</chem>     | -0.56        | 11 out of 64                      |
| ECFP_12                                       | -281505363        | <br><chem>[*][c]1:[cH]:[cH]:[cH]:[cH]:[cH]:[cH]:1</chem> | -0.56        | 11 out of 64                      |
| ECFP_12                                       | 1997021792        | <br><chem>[*]:[cH]:[cH]:[cH]:[*]</chem>                 | -0.296       | 36 out of 156                     |

# Sorafenib

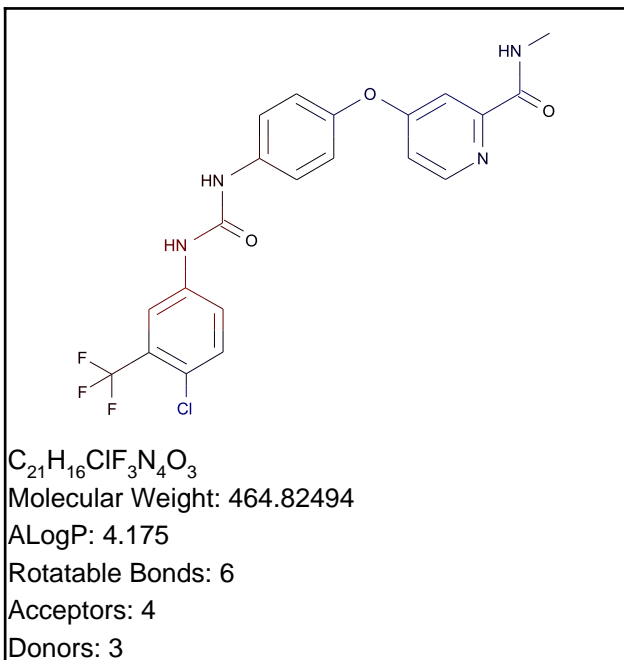

## Model Prediction

Prediction: Non-Carcinogen

Probability: 0.236

Enrichment: 0.734

Bayesian Score: -3.76

Mahalanobis Distance: 12.2

Mahalanobis Distance p-value: 0.00229

Prediction: Positive if the Bayesian score is above the estimated best cutoff value from minimizing the false positive and false negative rate.

Probability: The estimated probability that the sample is in the positive category. This assumes that the Bayesian score follows a normal distribution and is different from the prediction using a cutoff.

Enrichment: An estimate of enrichment, that is, the increased likelihood (versus random) of this sample being in the category.

Bayesian Score: The standard Laplacian-modified Bayesian score.

Mahalanobis Distance: The Mahalanobis distance (MD) is the distance to the center of the training data. The larger the MD, the less trustworthy the prediction.

Mahalanobis Distance p-value: The p-value gives the fraction of training data with an MD greater than or equal to the one for the given sample, assuming normally distributed data. The smaller the p-value, the less trustworthy the prediction. For highly non-normal X properties (e.g., fingerprints), the MD p-value is wildly inaccurate.

# TOPKAT\_Rat\_Female\_FDA\_None\_vs\_Carcinogen

## Structural Similar Compounds

| Name               | Glimepiride                                                                         | Glyburide                                                                           | Fluvastatin                                                                         |
|--------------------|-------------------------------------------------------------------------------------|-------------------------------------------------------------------------------------|-------------------------------------------------------------------------------------|
| Structure          | 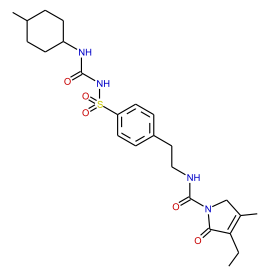 |  |  |
| Actual Endpoint    | Non-Carcinogen                                                                      | Non-Carcinogen                                                                      | Non-Carcinogen                                                                      |
| Predicted Endpoint | Non-Carcinogen                                                                      | Non-Carcinogen                                                                      | Non-Carcinogen                                                                      |
| Distance           | 0.620                                                                               | 0.635                                                                               | 0.635                                                                               |
| Reference          | US FDA (Centre for Drug Eval.& Res./Off. Testing & Res.) Sept. 1997                 | US FDA (Centre for Drug Eval.& Res./Off. Testing & Res.) Sept. 1997                 | US FDA (Centre for Drug Eval.& Res./Off. Testing & Res.) Sept. 1997                 |

## Model Applicability

Unknown features are fingerprint features in the query molecule, but not found or appearing too infrequently in the training set.

- All properties and OPS components are within expected ranges.

## Feature Contribution

### Top features for positive contribution

| Fingerprint | Bit/Smiles | Feature Structure                                                                                                                                                                       | Score | Carcinogen in training set |
|-------------|------------|-----------------------------------------------------------------------------------------------------------------------------------------------------------------------------------------|-------|----------------------------|
| ECFP_12     | -970385855 | 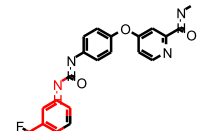<br><chem>[*]N(c1c([cH]:[*]:[c]([*]:[c]([*]:[c]([cH]:1)C([*]:[c]([cH]:1)C([*])([*])[*])])])</chem> | 0.613 | 2 out of 2                 |

|                                               |                   |                                                                                                                          |              |                                   |
|-----------------------------------------------|-------------------|--------------------------------------------------------------------------------------------------------------------------|--------------|-----------------------------------|
| ECFP_12                                       | -177077903        | 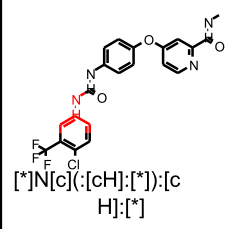<br>[*]N[c](:[cH]:[*]):[c<br>H]:[*]   | 0.529        | 6 out of 10                       |
| ECFP_12                                       | -1236483485       | <br>[*]C(=[*])N[c](:[*]):<br>[*]      | 0.46         | 9 out of 17                       |
| <b>Top Features for negative contribution</b> |                   |                                                                                                                          |              |                                   |
| <b>Fingerprint</b>                            | <b>Bit/Smiles</b> | <b>Feature Structure</b>                                                                                                 | <b>Score</b> | <b>Carcinogen in training set</b> |
| ECFP_12                                       | 1335691903        | <br>[*][c](:[*]):[c](Cl):<br>[cH]:[*] | -1.11        | 2 out of 26                       |
| ECFP_12                                       | 99947387          | <br>[*]:[c](:[*])Cl                  | -0.817       | 8 out of 62                       |
| ECFP_12                                       | 1413420509        | <br>[*]C(=[*])[c](:[cH]:[*]):n:[*]  | -0.661       | 0 out of 3                        |



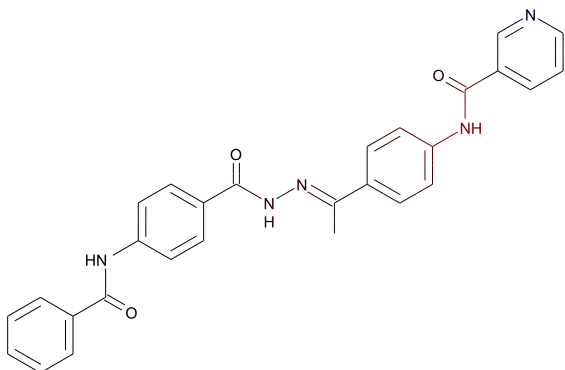
 $C_{28}H_{23}N_5O_3$ 

Molecular Weight: 477.51391

ALogP: 3.082

Rotatable Bonds: 7

Acceptors: 5

Donors: 3

### Model Prediction

Prediction: Multiple-Carcinogen

Probability: 0.605

Enrichment: 1.62

Bayesian Score: 3.33

Mahalanobis Distance: 13.1

Mahalanobis Distance p-value: 0.000192

Prediction: Positive if the Bayesian score is above the estimated best cutoff value from minimizing the false positive and false negative rate.

Probability: The estimated probability that the sample is in the positive category. This assumes that the Bayesian score follows a normal distribution and is different from the prediction using a cutoff.

Enrichment: An estimate of enrichment, that is, the increased likelihood (versus random) of this sample being in the category.

Bayesian Score: The standard Laplacian-modified Bayesian score.

Mahalanobis Distance: The Mahalanobis distance (MD) is the distance to the center of the training data. The larger the MD, the less trustworthy the prediction.

Mahalanobis Distance p-value: The p-value gives the fraction of training data with an MD greater than or equal to the one for the given sample, assuming normally distributed data. The smaller the p-value, the less trustworthy the prediction. For highly non-normal X properties (e.g., fingerprints), the MD p-value is wildly inaccurate.

### Structural Similar Compounds

| Name               | Bicalutamide                                                        | Torsemide                                                           | Ursodiol                                                            |
|--------------------|---------------------------------------------------------------------|---------------------------------------------------------------------|---------------------------------------------------------------------|
| Structure          |                                                                     |                                                                     |                                                                     |
| Actual Endpoint    | Multiple-Carcinogen                                                 | Single-Carcinogen                                                   | Single-Carcinogen                                                   |
| Predicted Endpoint | Multiple-Carcinogen                                                 | Single-Carcinogen                                                   | Single-Carcinogen                                                   |
| Distance           | 0.638                                                               | 0.714                                                               | 0.738                                                               |
| Reference          | US FDA (Centre for Drug Eval.& Res./Off. Testing & Res.) Sept. 1997 | US FDA (Centre for Drug Eval.& Res./Off. Testing & Res.) Sept. 1997 | US FDA (Centre for Drug Eval.& Res./Off. Testing & Res.) Sept. 1997 |

### Model Applicability

Unknown features are fingerprint features in the query molecule, but not found or appearing too infrequently in the training set.

1. All properties and OPS components are within expected ranges.

### Feature Contribution

#### Top features for positive contribution

| Fingerprint | Bit/Smiles | Feature Structure               | Score | Multiple-Carcinogen in training set |
|-------------|------------|---------------------------------|-------|-------------------------------------|
| SCFP_4      | 1631845520 | <br>[*]C(=[*])N[c]([*]):<br>[*] | 0.601 | 6 out of 9                          |

|                                               |                   |                                                                                                                                            |              |                                            |
|-----------------------------------------------|-------------------|--------------------------------------------------------------------------------------------------------------------------------------------|--------------|--------------------------------------------|
| SCFP_4                                        | -1375926917       | 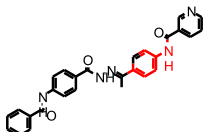<br><chem>[*]N[c]1:[cH]:[*]:[c]([*]):[cH]:[cH]:1</chem> | 0.522        | 6 out of 10                                |
| SCFP_4                                        | 1205586762        | <br><chem>[*]N[c](:[cH]:[*]):[cH]:[*]</chem>            | 0.451        | 7 out of 13                                |
| <b>Top Features for negative contribution</b> |                   |                                                                                                                                            |              |                                            |
| <b>Fingerprint</b>                            | <b>Bit/Smiles</b> | <b>Feature Structure</b>                                                                                                                   | <b>Score</b> | <b>Multiple-Carcinogen in training set</b> |
| SCFP_4                                        | 1188429584        | <br><chem>[*][c]1:[*]:[cH]:[cH]:n:[cH]:1</chem>         | -0.666       | 0 out of 3                                 |
| SCFP_4                                        | -758850909        | <br><chem>[*][c]1:[*]:n:[cH]:[cH]:[cH]:1</chem>       | -0.489       | 0 out of 2                                 |
| SCFP_4                                        | -937094999        | <br><chem>[*]1:[cH]:[cH]:[cH]:n:[cH]:1</chem>         | -0.368       | 1 out of 6                                 |



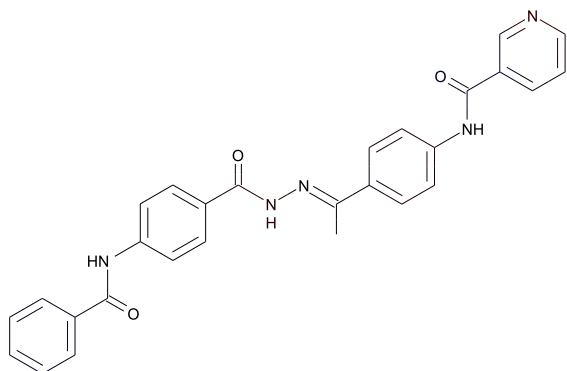

$C_{28}H_{23}N_5O_3$

Molecular Weight: 477.51391

ALogP: 3.082

Rotatable Bonds: 7

Acceptors: 5

Donors: 3

## Model Prediction

Prediction: Non-Carcinogen

Probability: 0.342

Enrichment: 1.02

Bayesian Score: -0.494

Mahalanobis Distance: 14.5

Mahalanobis Distance p-value: 5.99e-006

Prediction: Positive if the Bayesian score is above the estimated best cutoff value from minimizing the false positive and false negative rate.

Probability: The estimated probability that the sample is in the positive category. This assumes that the Bayesian score follows a normal distribution and is different from the prediction using a cutoff.

Enrichment: An estimate of enrichment, that is, the increased likelihood (versus random) of this sample being in the category.

Bayesian Score: The standard Laplacian-modified Bayesian score.

Mahalanobis Distance: The Mahalanobis distance (MD) is the distance to the center of the training data. The larger the MD, the less trustworthy the prediction.

Mahalanobis Distance p-value: The p-value gives the fraction of training data with an MD greater than or equal to the one for the given sample, assuming normally distributed data. The smaller the p-value, the less trustworthy the prediction. For highly non-normal X properties (e.g., fingerprints), the MD p-value is wildly inaccurate.

## Structural Similar Compounds

| Name               | Glimepiride                                                         | Glyburide                                                           | Glipizide                                                           |
|--------------------|---------------------------------------------------------------------|---------------------------------------------------------------------|---------------------------------------------------------------------|
| Structure          |                                                                     |                                                                     |                                                                     |
| Actual Endpoint    | Non-Carcinogen                                                      | Non-Carcinogen                                                      | Non-Carcinogen                                                      |
| Predicted Endpoint | Non-Carcinogen                                                      | Non-Carcinogen                                                      | Non-Carcinogen                                                      |
| Distance           | 0.546                                                               | 0.585                                                               | 0.632                                                               |
| Reference          | US FDA (Centre for Drug Eval.& Res./Off. Testing & Res.) Sept. 1997 | US FDA (Centre for Drug Eval.& Res./Off. Testing & Res.) Sept. 1997 | US FDA (Centre for Drug Eval.& Res./Off. Testing & Res.) Sept. 1997 |

## Model Applicability

Unknown features are fingerprint features in the query molecule, but not found or appearing too infrequently in the training set.

1. All properties and OPS components are within expected ranges.

## Feature Contribution

### Top features for positive contribution

| Fingerprint | Bit/Smiles | Feature Structure                                 | Score | Carcinogen in training set |
|-------------|------------|---------------------------------------------------|-------|----------------------------|
| SCFP_6      | 347048986  | <br>[*]C(=[*])N[c]1:[cH]:<br>[cH]:[*]:[cH]:[cH]:1 | 0.615 | 5 out of 7                 |

|                                               |                   |                                                                                                                                                   |              |                                   |
|-----------------------------------------------|-------------------|---------------------------------------------------------------------------------------------------------------------------------------------------|--------------|-----------------------------------|
| SCFP_6                                        | 698322229         | 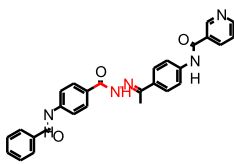<br><chem>[*]C(=[*])NN=[*]</chem>                              | 0.415        | 1 out of 1                        |
| SCFP_6                                        | -105808146        | <br><chem>[*][c]1:[cH]:[cH]:[cH]:[cH]:n:[cH]:1</chem>          | 0.415        | 1 out of 1                        |
| <b>Top Features for negative contribution</b> |                   |                                                                                                                                                   |              |                                   |
| <b>Fingerprint</b>                            | <b>Bit/Smiles</b> | <b>Feature Structure</b>                                                                                                                          | <b>Score</b> | <b>Carcinogen in training set</b> |
| SCFP_6                                        | 1653911926        | <br><chem>[*][c]1:[cH]:[cH]:[cH]:[cH]:[cH]:[cH]:1</chem>       | -0.504       | 12 out of 64                      |
| SCFP_6                                        | 1257084377        | <br><chem>[*]NC(=O)[c](:[*]):[*]</chem>                      | -0.436       | 4 out of 21                       |
| SCFP_6                                        | 124026986         | <br><chem>[*]:[cH]:[c](:[cH]):[*])C(=O)N[c](:[*]):[*]</chem> | -0.278       | 0 out of 1                        |

# Sorafenib

# TOPKAT\_Rat\_Male\_FDA\_None\_vs\_Carcinogen

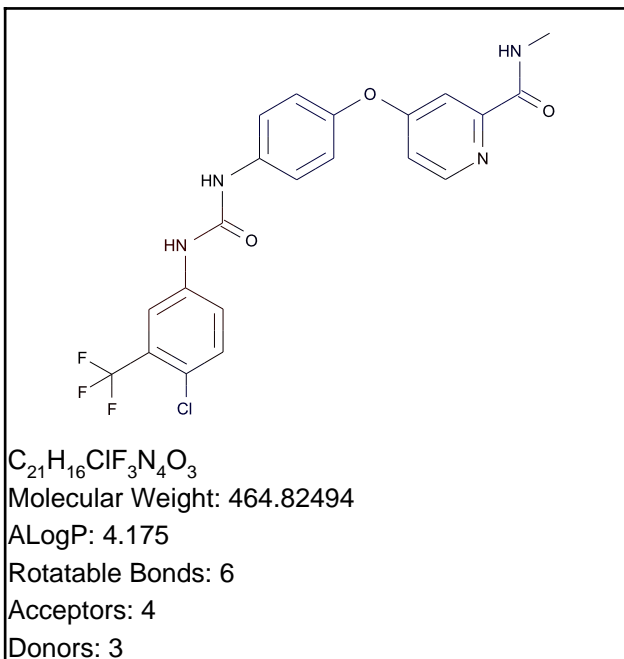

## Model Prediction

Prediction: Non-Carcinogen

Probability: 0.293

Enrichment: 0.878

Bayesian Score: -2.4

Mahalanobis Distance: 17.6

Mahalanobis Distance p-value: 1.1e-012

Prediction: Positive if the Bayesian score is above the estimated best cutoff value from minimizing the false positive and false negative rate.

Probability: The estimated probability that the sample is in the positive category. This assumes that the Bayesian score follows a normal distribution and is different from the prediction using a cutoff.

Enrichment: An estimate of enrichment, that is, the increased likelihood (versus random) of this sample being in the category.

Bayesian Score: The standard Laplacian-modified Bayesian score.

Mahalanobis Distance: The Mahalanobis distance (MD) is the distance to the center of the training data. The larger the MD, the less trustworthy the prediction.

Mahalanobis Distance p-value: The p-value gives the fraction of training data with an MD greater than or equal to the one for the given sample, assuming normally distributed data. The smaller the p-value, the less trustworthy the prediction. For highly non-normal X properties (e.g., fingerprints), the MD p-value is wildly inaccurate.

## Structural Similar Compounds

| Name               | Glyburide                                                                           | Glimepiride                                                                         | Fluvastatin                                                                         |
|--------------------|-------------------------------------------------------------------------------------|-------------------------------------------------------------------------------------|-------------------------------------------------------------------------------------|
| Structure          | 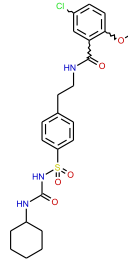 |  |  |
| Actual Endpoint    | Non-Carcinogen                                                                      | Non-Carcinogen                                                                      | Carcinogen                                                                          |
| Predicted Endpoint | Non-Carcinogen                                                                      | Non-Carcinogen                                                                      | Carcinogen                                                                          |
| Distance           | 0.593                                                                               | 0.600                                                                               | 0.615                                                                               |
| Reference          | US FDA (Centre for Drug Eval.& Res./Off. Testing & Res.) Sept. 1997                 | US FDA (Centre for Drug Eval.& Res./Off. Testing & Res.) Sept. 1997                 | US FDA (Centre for Drug Eval.& Res./Off. Testing & Res.) Sept. 1997                 |

## Model Applicability

Unknown features are fingerprint features in the query molecule, but not found or appearing too infrequently in the training set.

1. All properties and OPS components are within expected ranges.

## Feature Contribution

### Top features for positive contribution

| Fingerprint | Bit/Smiles | Feature Structure                                                                                                                      | Score | Carcinogen in training set |
|-------------|------------|----------------------------------------------------------------------------------------------------------------------------------------|-------|----------------------------|
| SCFP_6      | 347048986  | 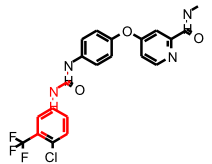<br>[*]C(=[*])N[c]1:[cH]:<br>[cH]:[*]:[cH]:[cH]:1 | 0.615 | 5 out of 7                 |

|                                               |                   |                                                                                                                                                      |              |                                   |
|-----------------------------------------------|-------------------|------------------------------------------------------------------------------------------------------------------------------------------------------|--------------|-----------------------------------|
| SCFP_6                                        | -754059116        | 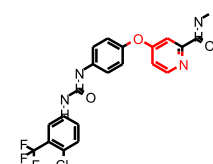<br>[*]O[c]1:[cH]:[*]:n:[cH]:[cH]:1                               | 0.415        | 1 out of 1                        |
| SCFP_6                                        | -531283893        | <br>[*]O[c]1:[cH]:[cH]:[c](NC(=[*])([*]):[cH]:[cH]:1              | 0.273        | 2 out of 4                        |
| <b>Top Features for negative contribution</b> |                   |                                                                                                                                                      |              |                                   |
| <b>Fingerprint</b>                            | <b>Bit/Smiles</b> | <b>Feature Structure</b>                                                                                                                             | <b>Score</b> | <b>Carcinogen in training set</b> |
| SCFP_6                                        | -827073191        | <br>[*]C(=[*])[c]1:[cH]:[*]:[cH]:[cH]:n:1                         | -0.674       | 0 out of 3                        |
| SCFP_6                                        | -488587948        | <br>[*]:[e](q*)O[c]1:[cH]:[cH]:[*]:[cH]:[cH]:1                   | -0.496       | 0 out of 2                        |
| SCFP_6                                        | -975241316        | <br>[*][c]1:[cH]:[cH]:[c](O[c](:[cH]:[*]):[cH]:[*]):[cH]:[cH]:1 | -0.496       | 0 out of 2                        |

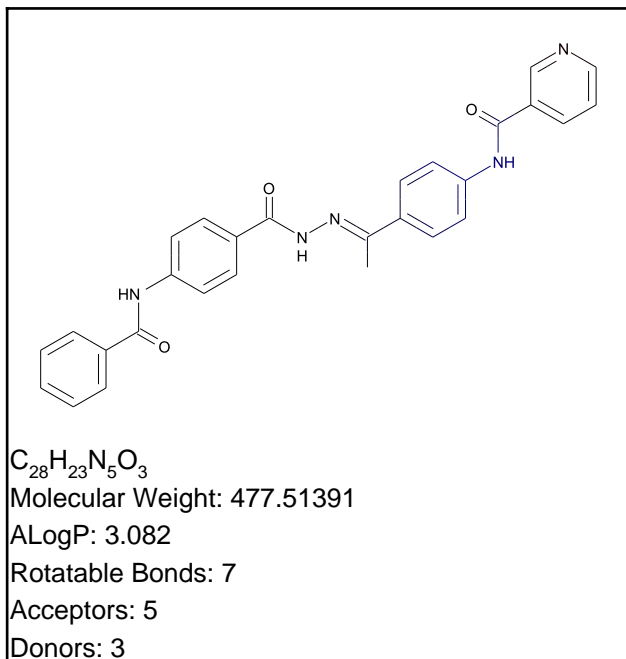

### Model Prediction

Prediction: Non-Irritant

Probability: 0.911

Enrichment: 0.989

Bayesian Score: -2.62

Mahalanobis Distance: 7.39

Mahalanobis Distance p-value: 0.981

Prediction: Positive if the Bayesian score is above the estimated best cutoff value from minimizing the false positive and false negative rate.

Probability: The estimated probability that the sample is in the positive category. This assumes that the Bayesian score follows a normal distribution and is different from the prediction using a cutoff.

Enrichment: An estimate of enrichment, that is, the increased likelihood (versus random) of this sample being in the category.

Bayesian Score: The standard Laplacian-modified Bayesian score.

Mahalanobis Distance: The Mahalanobis distance (MD) is the distance to the center of the training data. The larger the MD, the less trustworthy the prediction.

Mahalanobis Distance p-value: The p-value gives the fraction of training data with an MD greater than or equal to the one for the given sample, assuming normally distributed data. The smaller the p-value, the less trustworthy the prediction. For highly non-normal X properties (e.g., fingerprints), the MD p-value is wildly inaccurate.

### Structural Similar Compounds

| Name               | Benzenesulfonic acid, 2,2'-(4,4'-biphenyldiylidene)di-, disodium salt                                     | 2-Anthracenesulfonic acid, 1-amino-9,10-dihydro-9,10-dioxo-4-(2,4,6-trimethylanilino)-, monosodium salt                                            | 5-Norbornene-2,3-dicarboxylic acid, 1,4,5,6,7,7-hexachloro-                                                                                       |
|--------------------|-----------------------------------------------------------------------------------------------------------|----------------------------------------------------------------------------------------------------------------------------------------------------|---------------------------------------------------------------------------------------------------------------------------------------------------|
| Structure          | 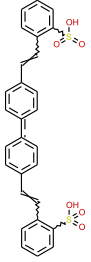                       |                                                                 |                                                                |
| Actual Endpoint    | Irritant                                                                                                  | Irritant                                                                                                                                           | Irritant                                                                                                                                          |
| Predicted Endpoint | Non-Irritant                                                                                              | Non-Irritant                                                                                                                                       | Irritant                                                                                                                                          |
| Distance           | 0.833                                                                                                     | 0.865                                                                                                                                              | 0.910                                                                                                                                             |
| Reference          | MVCRB3 MVC-Report. (Stockholm, Sweden) No.1-2, 1972-73. Discontinued. Volume(issue)/page/year: 2,193,1973 | 85JCAE "Prehled Prumyslove Toxikologie; Organické Latky," Marhold, J., Prague, Czechoslovakia, Avicenum, 1986 Volume(issue)/page/year: -,1327,1986 | 85JCAE "Prehled Prumyslove Toxikologie; Organické Latky," Marhold, J., Prague, Czechoslovakia, Avicenum, 1986 Volume(issue)/page/year: -,581,1986 |

### Model Applicability

Unknown features are fingerprint features in the query molecule, but not found or appearing too infrequently in the training set.

- All properties and OPS components are within expected ranges.

### Feature Contribution

#### Top features for positive contribution

| Fingerprint | Bit/Smiles | Feature Structure | Score | Irritant in training set |
|-------------|------------|-------------------|-------|--------------------------|
|             |            |                   |       |                          |



|                                               |                   |                                                                                                                                        |              |                                 |
|-----------------------------------------------|-------------------|----------------------------------------------------------------------------------------------------------------------------------------|--------------|---------------------------------|
| FCFP_12                                       | -124655670        | 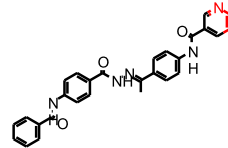<br>[*]:[cH]:[cH]:n:[*]                             | 0.0821       | 13 out of 13                    |
| FCFP_12                                       | -1695756380       | <br>[*]1:[cH]:[cH]:[cH]:n<br>:[cH]:1                | 0.0772       | 7 out of 7                      |
| FCFP_12                                       | 730557100         | <br>[*][c]1:[*]:n:[cH]:[c<br>H]:[cH]:1              | 0.0756       | 6 out of 6                      |
| <b>Top Features for negative contribution</b> |                   |                                                                                                                                        |              |                                 |
| <b>Fingerprint</b>                            | <b>Bit/Smiles</b> | <b>Feature Structure</b>                                                                                                               | <b>Score</b> | <b>Irritant in training set</b> |
| FCFP_12                                       | -1838187238       | <br>[*]C(=[*])N[c]1:[cH]:<br>[cH]:[*]:[cH]:[cH]:1 | -0.692       | 5 out of 12                     |
| FCFP_12                                       | 1294255210        | <br>[*]C(=[*])N[c](:[*]):<br>[*]                  | -0.486       | 12 out of 22                    |

|         |            |                                                                                                                                          |        |              |
|---------|------------|------------------------------------------------------------------------------------------------------------------------------------------|--------|--------------|
| FCFP_12 | -773983804 | 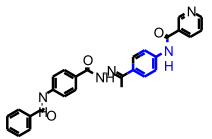<br><chem>O=C1C=NC2=C(C=C1)N(C2)C(=O)Nc3ccncc3</chem> | -0.444 | 46 out of 79 |
|---------|------------|------------------------------------------------------------------------------------------------------------------------------------------|--------|--------------|

# Sorafenib

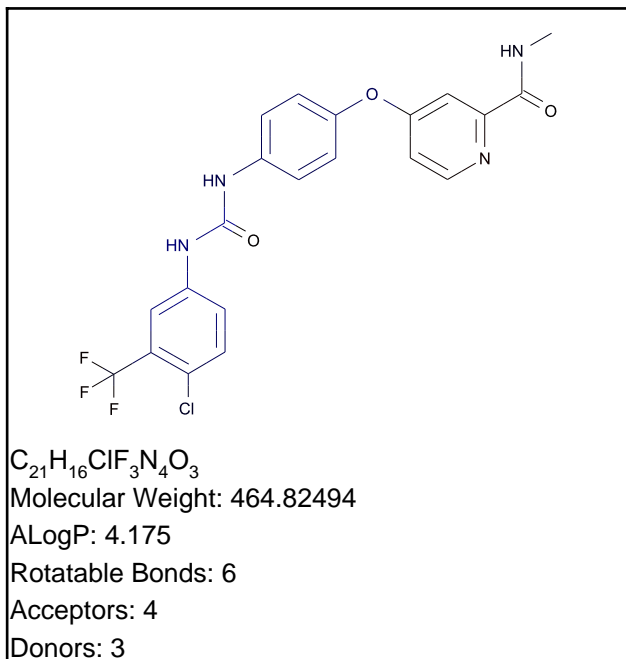

## Model Prediction

Prediction: Non-Irritant

Probability: 0.264

Enrichment: 0.287

Bayesian Score: -5.23

Mahalanobis Distance: 8.27

Mahalanobis Distance p-value: 0.791

Prediction: Positive if the Bayesian score is above the estimated best cutoff value from minimizing the false positive and false negative rate.

Probability: The estimated probability that the sample is in the positive category. This assumes that the Bayesian score follows a normal distribution and is different from the prediction using a cutoff.

Enrichment: An estimate of enrichment, that is, the increased likelihood (versus random) of this sample being in the category.

Bayesian Score: The standard Laplacian-modified Bayesian score.

Mahalanobis Distance: The Mahalanobis distance (MD) is the distance to the center of the training data. The larger the MD, the less trustworthy the prediction.

Mahalanobis Distance p-value: The p-value gives the fraction of training data with an MD greater than or equal to the one for the given sample, assuming normally distributed data. The smaller the p-value, the less trustworthy the prediction. For highly non-normal X properties (e.g., fingerprints), the MD p-value is wildly inaccurate.

# TOPKAT\_Skin\_Irritancy\_None\_vs\_Irritant

## Structural Similar Compounds

| Name               | 5-Norbornene-2,3-dicarboxylic acid, 1,4,5,6,7,7-hexachloro-                                                                                          | Benzenesulfonic acid, 2,2'-(4,4'-biphenylylene)di-, disodium salt                                         | Sulfide, bis(4-t-butyl-m-cresyl)-                                                                                                                                              |
|--------------------|------------------------------------------------------------------------------------------------------------------------------------------------------|-----------------------------------------------------------------------------------------------------------|--------------------------------------------------------------------------------------------------------------------------------------------------------------------------------|
| Structure          | 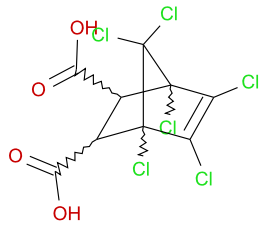                                                                  |                        |                                                                                             |
| Actual Endpoint    | Irritant                                                                                                                                             | Irritant                                                                                                  | Irritant                                                                                                                                                                       |
| Predicted Endpoint | Irritant                                                                                                                                             | Non-Irritant                                                                                              | Irritant                                                                                                                                                                       |
| Distance           | 0.844                                                                                                                                                | 0.871                                                                                                     | 0.884                                                                                                                                                                          |
| Reference          | 85JCAE "Prehled Prumyslove Toxikologie; Organické Latky," Marhold, J., Prague, Czechoslovakia, Avicenum, 1986<br>Volume(issue)/page/year: -,581,1986 | MVCRB3 MVC-Report. (Stockholm, Sweden) No.1-2, 1972-73. Discontinued. Volume(issue)/page/year: 2,193,1973 | AMIHBC AMA Archives of Industrial Hygiene and Occupational Medicine. (Chicago, IL) V.2-10, 1950-54. For publisher information, see AEHLAU. Volume(issue)/page/year: 5,311,1952 |

## Model Applicability

Unknown features are fingerprint features in the query molecule, but not found or appearing too infrequently in the training set.

1. All properties and OPS components are within expected ranges.

## Feature Contribution

### Top features for positive contribution

| Fingerprint | Bit/Smiles | Feature Structure | Score | Irritant in training set |
|-------------|------------|-------------------|-------|--------------------------|
|             |            |                   |       |                          |

|                                               |                   |                                                                                                                                            |              |                                 |
|-----------------------------------------------|-------------------|--------------------------------------------------------------------------------------------------------------------------------------------|--------------|---------------------------------|
| FCFP_12                                       | -124655670        | 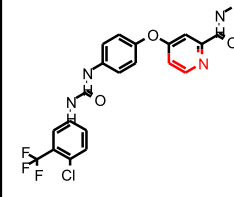<br>[*]:[cH]:[cH]:n:[*]                                 | 0.0821       | 13 out of 13                    |
| FCFP_12                                       | -1539132615       | <br>[*]C(=[*])[c](-[cH]:[*]):n:[*]                      | 0.0795       | 9 out of 9                      |
| FCFP_12                                       | -1695756380       | <br>[*]1:[cH]:[cH]:[cH]:n<br>:[cH]:1                    | 0.0772       | 7 out of 7                      |
| <b>Top Features for negative contribution</b> |                   |                                                                                                                                            |              |                                 |
| <b>Fingerprint</b>                            | <b>Bit/Smiles</b> | <b>Feature Structure</b>                                                                                                                   | <b>Score</b> | <b>Irritant in training set</b> |
| FCFP_12                                       | -789307649        | <br>[*]O[c]([*])[cH]:[cH]:[c](NC(=[*])[*]):[cH]:[cH]:1 | -1.54        | 0 out of 4                      |
| FCFP_12                                       | -1838187238       | <br>[*]C(=[*])N[c]1:[cH]:[cH]:[*]:[cH]:[cH]:1         | -0.692       | 5 out of 12                     |

|         |            |                                                                                                                                               |        |              |
|---------|------------|-----------------------------------------------------------------------------------------------------------------------------------------------|--------|--------------|
| FCFP_12 | 1294255210 | 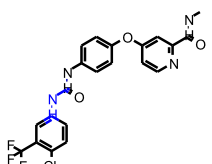<br><chem>[*]C(=[*])N(c(:[*])):</chem><br><chem>[*]</chem> | -0.486 | 12 out of 22 |
|---------|------------|-----------------------------------------------------------------------------------------------------------------------------------------------|--------|--------------|

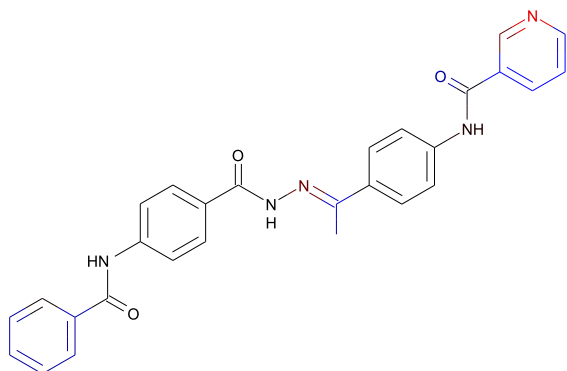
 $C_{28}H_{23}N_5O_3$ 

Molecular Weight: 477.51391

ALogP: 3.082

Rotatable Bonds: 7

Acceptors: 5

Donors: 3

### Model Prediction

Prediction: 13.5

Unit: mg/kg\_body\_weight/day

Mahalanobis Distance: 11.6

Mahalanobis Distance p-value: 0.000154

Mahalanobis Distance: The Mahalanobis distance (MD) is a generalization of the Euclidean distance that accounts for correlations among the X properties. It is calculated as the distance to the center of the training data. The larger the MD, the less trustworthy the prediction.

Mahalanobis Distance p-value: The p-value gives the fraction of training data with an MD greater than or equal to the one for the given sample, assuming normally distributed data. The smaller the p-value, the less trustworthy the prediction. For highly non-normal X properties (e.g., fingerprints), the MD p-value is wildly inaccurate.

### Structural Similar Compounds

| Name                        | Ochratoxin A | 542     | Tamoxifen citrate |
|-----------------------------|--------------|---------|-------------------|
| Structure                   |              |         |                   |
| Actual Endpoint (-log C)    | 4.79932      | 4.79932 | 5.05965           |
| Predicted Endpoint (-log C) | 3.6353       | 3.6353  | 4.24168           |
| Distance                    | 0.816        | 0.816   | 0.866             |
| Reference                   | CPDB         | CPDB    | CPDB              |

### Model Applicability

Unknown features are fingerprint features in the query molecule, but not found or appearing too infrequently in the training set.

1. OPS PC23 out of range. Value: -2.85. Training min, max, SD, explained variance: -2.6901, 3.3252, 1.05, 0.0138.
2. Unknown ECFP\_2 feature: 128986386: [\*]N=C(/C)\[c](:[\*]):[\*]
3. Unknown ECFP\_2 feature: 560380707: [\*]NN=C([\*])[\*]

### Feature Contribution

#### Top features for positive contribution

| Fingerprint | Bit/Smiles | Feature Structure | Score |
|-------------|------------|-------------------|-------|
| ECFP_6      | 655739385  | <br>[*]:n:[*]     | 0.229 |

|                                               |                   |                                                                                                                                       |              |
|-----------------------------------------------|-------------------|---------------------------------------------------------------------------------------------------------------------------------------|--------------|
| ECFP_6                                        | -175146122        | 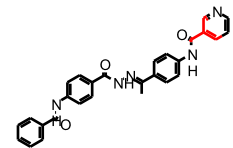<br><chem>[*]C(=[*])[c](:[cH]:[*]):[cH]:[*]</chem> | 0.107        |
| ECFP_6                                        | -1087070950       | <br><chem>[*]N=[*]</chem>                          | 0.104        |
| <b>Top Features for negative contribution</b> |                   |                                                                                                                                       |              |
| <b>Fingerprint</b>                            | <b>Bit/Smiles</b> | <b>Feature Structure</b>                                                                                                              | <b>Score</b> |
| ECFP_6                                        | 1996767644        | <br><chem>[*][c](:[*]):[cH]:[cH]:[*]</chem>        | -0.251       |
| ECFP_6                                        | 642810091         | <br><chem>[*][c](:[*]):[*]</chem>                | -0.247       |
| ECFP_6                                        | -182236392        | <br><chem>[*]:[cH]:[*]</chem>                    | -0.232       |





# Sorafenib

# TOPKAT\_Carcinogenic\_Potency\_TD50\_Mouse

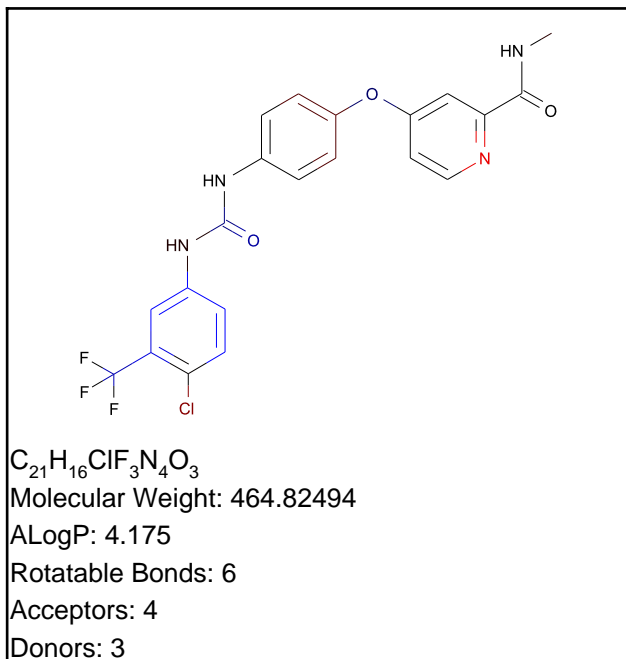

## Model Prediction

Prediction: 19.2

Unit: mg/kg\_body\_weight/day

Mahalanobis Distance: 12.4

Mahalanobis Distance p-value: 2.94e-006

Mahalanobis Distance: The Mahalanobis distance (MD) is a generalization of the Euclidean distance that accounts for correlations among the X properties. It is calculated as the distance to the center of the training data. The larger the MD, the less trustworthy the prediction.

Mahalanobis Distance p-value: The p-value gives the fraction of training data with an MD greater than or equal to the one for the given sample, assuming normally distributed data. The smaller the p-value, the less trustworthy the prediction. For highly non-normal X properties (e.g., fingerprints), the MD p-value is wildly inaccurate.

## Structural Similar Compounds

| Name                        | Ochratoxin A                                                                        | 542                                                                                 | 4-Chloro-6-(2,3-xylylidino)-2-pyridinylthio(N-b-hydroxy-ethyl) acetamide            |
|-----------------------------|-------------------------------------------------------------------------------------|-------------------------------------------------------------------------------------|-------------------------------------------------------------------------------------|
| Structure                   | 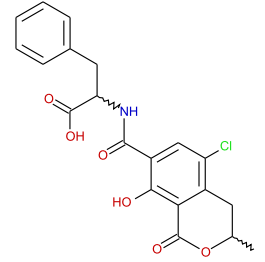 |  |  |
| Actual Endpoint (-log C)    | 4.79932                                                                             | 4.79932                                                                             | 3.91517                                                                             |
| Predicted Endpoint (-log C) | 3.6353                                                                              | 3.6353                                                                              | 3.92186                                                                             |
| Distance                    | 0.718                                                                               | 0.718                                                                               | 0.738                                                                               |
| Reference                   | CPDB                                                                                | CPDB                                                                                | CPDB                                                                                |

## Model Applicability

Unknown features are fingerprint features in the query molecule, but not found or appearing too infrequently in the training set.

- All properties and OPS components are within expected ranges.
- Unknown ECFP\_2 feature: 1338334141: [\*]C(=[\*])NC
- Unknown ECFP\_2 feature: 1413420509: [\*]C(=[\*])[c](:n:[\*]):c:[\*]

## Feature Contribution

### Top features for positive contribution

| Fingerprint | Bit/Smiles | Feature Structure                                                                                  | Score |
|-------------|------------|----------------------------------------------------------------------------------------------------|-------|
| ECFP_6      | 655739385  | 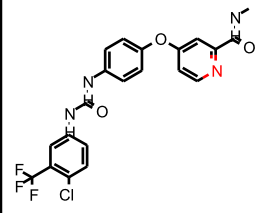<br>[*]:n:[*] | 0.229 |

|                                               |                   |                                                                                                                    |              |
|-----------------------------------------------|-------------------|--------------------------------------------------------------------------------------------------------------------|--------------|
| ECFP_6                                        | -817402818        | 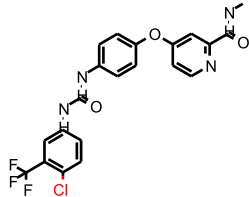<br>[*]Cl                       | 0.129        |
| ECFP_6                                        | -176455838        | <br>[*]O[c](:[cH]:[*]):[cH]:[*] | 0.0818       |
| <b>Top Features for negative contribution</b> |                   |                                                                                                                    |              |
| <b>Fingerprint</b>                            | <b>Bit/Smiles</b> | <b>Feature Structure</b>                                                                                           | <b>Score</b> |
| ECFP_6                                        | 1996767644        | <br>[*][c](:[*]):[cH]:[cH]:[*]  | -0.251       |
| ECFP_6                                        | 642810091         | <br>[*][c](:[*]):[*]          | -0.247       |
| ECFP_6                                        | -182236392        | <br>[*]:[cH]:[*]              | -0.232       |



Q4

TOPKAT\_Carcinogenic\_Potency\_TD50\_Rat

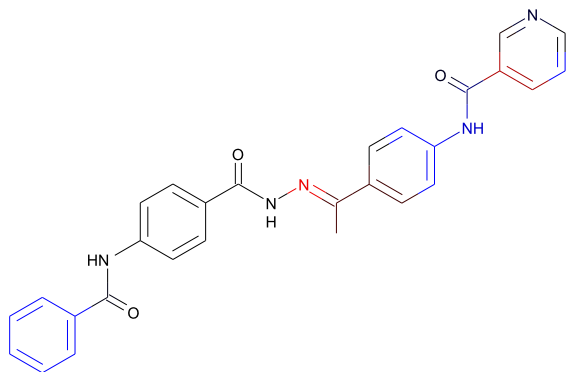
 $C_{28}H_{23}N_5O_3$ 

Molecular Weight: 477.51391

ALogP: 3.082

Rotatable Bonds: 7

Acceptors: 5

Donors: 3

### Model Prediction

Prediction: 45.4

Unit: mg/kg\_body\_weight/day

Mahalanobis Distance: 13

Mahalanobis Distance p-value: 5.88e-006

Mahalanobis Distance: The Mahalanobis distance (MD) is a generalization of the Euclidean distance that accounts for correlations among the X properties. It is calculated as the distance to the center of the training data. The larger the MD, the less trustworthy the prediction.

Mahalanobis Distance p-value: The p-value gives the fraction of training data with an MD greater than or equal to the one for the given sample, assuming normally distributed data. The smaller the p-value, the less trustworthy the prediction. For highly non-normal X properties (e.g., fingerprints), the MD p-value is wildly inaccurate.

### Structural Similar Compounds

| Name                        | 913     | Fluvastatin | Ochratoxin A |
|-----------------------------|---------|-------------|--------------|
| Structure                   |         |             |              |
| Actual Endpoint (-log C)    | 3.51742 | 3.51742     | 6.47264      |
| Predicted Endpoint (-log C) | 5.41573 | 5.41573     | 5.06501      |
| Distance                    | 0.730   | 0.730       | 0.767        |
| Reference                   | CPDB    | CPDB        | CPDB         |

### Model Applicability

Unknown features are fingerprint features in the query molecule, but not found or appearing too infrequently in the training set.

1. All properties and OPS components are within expected ranges.

### Feature Contribution

#### Top features for positive contribution

| Fingerprint | Bit/Smiles | Feature Structure | Score |
|-------------|------------|-------------------|-------|
| FCFP_6      | 1          | <p>[*]N=[*]</p>   | 0.234 |

|                                               |                   |                                                                                                                                  |              |
|-----------------------------------------------|-------------------|----------------------------------------------------------------------------------------------------------------------------------|--------------|
| FCFP_6                                        | 730557100         | 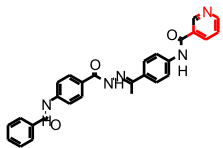<br>[*][c]1:[*]:n:[cH]:[cH]:[cH]:1            | 0.141        |
| FCFP_6                                        | 203677720         | <br>[*]C(=[*])[c](:[cH]:[*]):[cH]:[*]         | 0.137        |
| <b>Top Features for negative contribution</b> |                   |                                                                                                                                  |              |
| <b>Fingerprint</b>                            | <b>Bit/Smiles</b> | <b>Feature Structure</b>                                                                                                         | <b>Score</b> |
| FCFP_6                                        | 991735244         | <br>[*][c]1:[*]:[cH]:[cH]:[cH]:[cH]:1         | -0.422       |
| FCFP_6                                        | -2093839777       | <br>[*][c]1:[cH]:[cH]:[cH]:[cH]:[cH]:[cH]:1 | -0.378       |
| FCFP_6                                        | 16                | <br>[*]:[cH]:[*]                            | -0.354       |



# Sorafenib

# TOPKAT\_Carcinogenic\_Potency\_TD50\_Rat

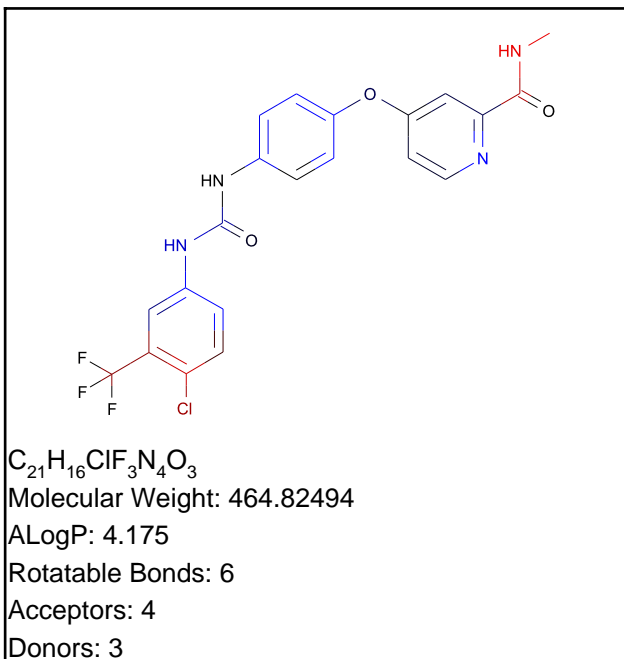

## Model Prediction

Prediction: 14.2

Unit: mg/kg\_body\_weight/day

Mahalanobis Distance: 20.4

Mahalanobis Distance p-value: 9.56e-031

Mahalanobis Distance: The Mahalanobis distance (MD) is a generalization of the Euclidean distance that accounts for correlations among the X properties. It is calculated as the distance to the center of the training data. The larger the MD, the less trustworthy the prediction.

Mahalanobis Distance p-value: The p-value gives the fraction of training data with an MD greater than or equal to the one for the given sample, assuming normally distributed data. The smaller the p-value, the less trustworthy the prediction. For highly non-normal X properties (e.g., fingerprints), the MD p-value is wildly inaccurate.

## Structural Similar Compounds

| Name                        | Fluvastatin                                                                         | 913                                                                                 | Ochratoxin A                                                                        |
|-----------------------------|-------------------------------------------------------------------------------------|-------------------------------------------------------------------------------------|-------------------------------------------------------------------------------------|
| Structure                   | 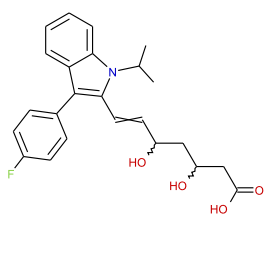 |  |  |
| Actual Endpoint (-log C)    | 3.51742                                                                             | 3.51742                                                                             | 6.47264                                                                             |
| Predicted Endpoint (-log C) | 5.41573                                                                             | 5.41573                                                                             | 5.06501                                                                             |
| Distance                    | 0.597                                                                               | 0.597                                                                               | 0.666                                                                               |
| Reference                   | CPDB                                                                                | CPDB                                                                                | CPDB                                                                                |

## Model Applicability

Unknown features are fingerprint features in the query molecule, but not found or appearing too infrequently in the training set.

1. All properties and OPS components are within expected ranges.
2. Unknown FCFP\_2 feature: -1029533685: [\*]:[c](:[\*])C(F)(F)F

## Feature Contribution

### Top features for positive contribution

| Fingerprint | Bit/Smiles | Feature Structure                                                                                 | Score |
|-------------|------------|---------------------------------------------------------------------------------------------------|-------|
| FCFP_6      | 1          | 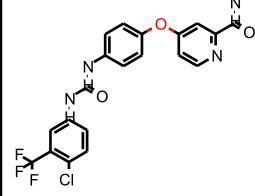<br>[*]N=[*] | 0.234 |

|                                               |                   |                                                                                                                                 |              |
|-----------------------------------------------|-------------------|---------------------------------------------------------------------------------------------------------------------------------|--------------|
| FCFP_6                                        | -885550502        | 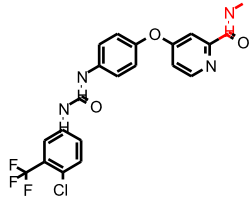<br>[*]C(=[*])NC                             | 0.229        |
| FCFP_6                                        | 32                | <br>[*]Cl                                    | 0.154        |
| <b>Top Features for negative contribution</b> |                   |                                                                                                                                 |              |
| <b>Fingerprint</b>                            | <b>Bit/Smiles</b> | <b>Feature Structure</b>                                                                                                        | <b>Score</b> |
| FCFP_6                                        | 16                | <br>[*]:[cH]:[*]                             | -0.354       |
| FCFP_6                                        | 590925877         | <br>[*]N[c](:[cH]:[*]):[cH]:[*]            | -0.323       |
| FCFP_6                                        | 1674451008        | <br>[*]O[c]1:[cH]:[*]:[c]([*]):[cH]:[cH]:1 | -0.233       |





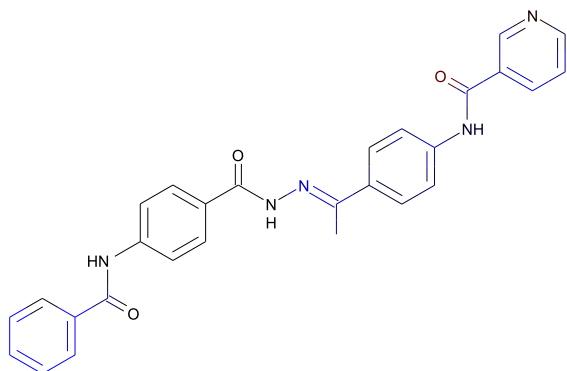

$C_{28}H_{23}N_5O_3$

Molecular Weight: 477.51391

ALogP: 3.082

Rotatable Bonds: 7

Acceptors: 5

Donors: 3

### Model Prediction

Prediction: 0.336

Unit: g/kg\_body\_weight

Mahalanobis Distance: 31.9

Mahalanobis Distance p-value: 3.77e-028

Mahalanobis Distance: The Mahalanobis distance (MD) is a generalization of the Euclidean distance that accounts for correlations among the X properties. It is calculated as the distance to the center of the training data. The larger the MD, the less trustworthy the prediction.

Mahalanobis Distance p-value: The p-value gives the fraction of training data with an MD greater than or equal to the one for the given sample, assuming normally distributed data. The smaller the p-value, the less trustworthy the prediction. For highly non-normal X properties (e.g., fingerprints), the MD p-value is wildly inaccurate.

### Structural Similar Compounds

| Name                        | GLYBURIDE | GLIPIZIDE | C.I.PIGMENT RED 23 |
|-----------------------------|-----------|-----------|--------------------|
| Structure                   |           |           |                    |
| Actual Endpoint (-log C)    | 4.21661   | 3.94991   | 2.28997            |
| Predicted Endpoint (-log C) | 4.21035   | 3.95594   | 3.52921            |
| Distance                    | 0.787     | 0.790     | 0.837              |
| Reference                   | UPJ-26452 | NDA-17583 | NTP 411 146        |

### Model Applicability

Unknown features are fingerprint features in the query molecule, but not found or appearing too infrequently in the training set.

1. All properties and OPS components are within expected ranges.
2. Unknown ECFP\_6 feature: 1997021792: [\*]:[cH]:[cH]:[cH]:[\*]
3. Unknown ECFP\_6 feature: 1996163143: [\*]:[cH]:[cH]:n:[\*]
4. Unknown ECFP\_6 feature: -677055651: [\*]:[cH]:n:[cH]:[\*]
5. Unknown ECFP\_6 feature: -709633021: [\*][c](:[\*]):[cH]:n:[\*]
6. Unknown ECFP\_6 feature: -175146122: [\*]C(=[\*])[c](:[cH]:[\*]):[cH]:[\*]
7. Unknown ECFP\_6 feature: 1430169877: [\*]NC(=O)[c](:[\*]):[\*]
8. Unknown ECFP\_6 feature: -177077903: [\*]N[c](:[cH]:[\*]):[cH]:[\*]
9. Unknown ECFP\_6 feature: 128986386: [\*]N=C(/C)[c](:[\*]):[\*]
10. Unknown ECFP\_6 feature: 560380707: [\*]NN=C([\*])[\*]
11. Unknown ECFP\_6 feature: 544048674: [\*]C(=[\*])NN=[\*]

### Feature Contribution

#### Top features for positive contribution

| Fingerprint | Bit/Smiles | Feature Structure | Score |
|-------------|------------|-------------------|-------|
|             |            |                   |       |

|                                               |                   |                                                                                                                            |              |
|-----------------------------------------------|-------------------|----------------------------------------------------------------------------------------------------------------------------|--------------|
| FCFP_6                                        | 3                 | 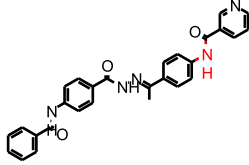<br>[*]N[*]                             | 0.0924       |
| FCFP_6                                        | -2093839777       | <br>[*][c]1:[cH]:[cH]:[cH]:[cH]:[cH]:1  | 0.078        |
| ECFP_6                                        | 2099970318        | <br>[*]C(=O)[*]                         | 0.0766       |
| <b>Top Features for negative contribution</b> |                   |                                                                                                                            |              |
| <b>Fingerprint</b>                            | <b>Bit/Smiles</b> | <b>Feature Structure</b>                                                                                                   | <b>Score</b> |
| FCFP_6                                        | 991735244         | <br>[*][c]1:[*]:[cH]:[cH]:[cH]:[cH]:1 | -0.134       |
| ECFP_6                                        | 1564392544        | <br>[*][c]1:[*]:[cH]:[cH]:[cH]:[cH]:1 | -0.133       |

|        |   |                                                                                                 |        |
|--------|---|-------------------------------------------------------------------------------------------------|--------|
| FCFP_6 | 1 | 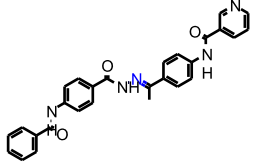<br>[*]N=[*] | -0.102 |
|--------|---|-------------------------------------------------------------------------------------------------|--------|

# Sorafenib

# TOPKAT\_Chronic\_LOAEL

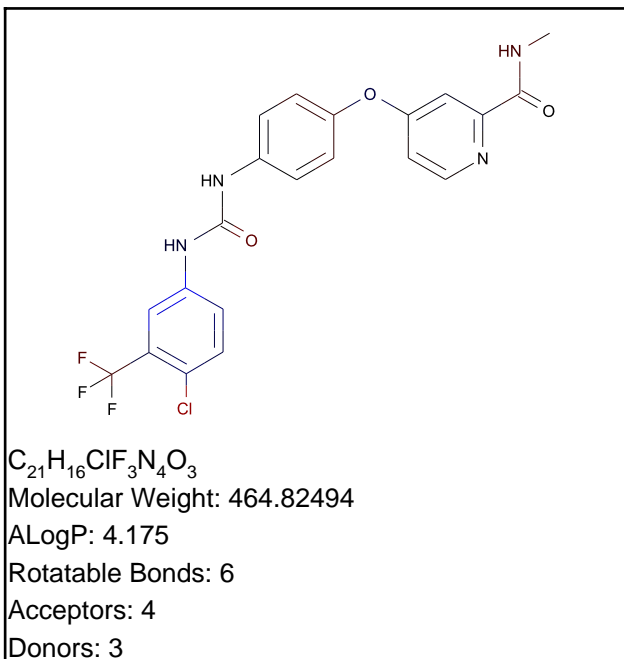

## Model Prediction

Prediction: 0.00483

Unit: g/kg\_body\_weight

Mahalanobis Distance: 30

Mahalanobis Distance p-value: 1.21e-024

Mahalanobis Distance: The Mahalanobis distance (MD) is a generalization of the Euclidean distance that accounts for correlations among the X properties. It is calculated as the distance to the center of the training data. The larger the MD, the less trustworthy the prediction.

Mahalanobis Distance p-value: The p-value gives the fraction of training data with an MD greater than or equal to the one for the given sample, assuming normally distributed data. The smaller the p-value, the less trustworthy the prediction. For highly non-normal X properties (e.g., fingerprints), the MD p-value is wildly inaccurate.

## Structural Similar Compounds

| Name                        | GLYBURIDE                                                                           | D & C RED 9                                                                         | SODIUM ACIFLUORFEN                                                                  |
|-----------------------------|-------------------------------------------------------------------------------------|-------------------------------------------------------------------------------------|-------------------------------------------------------------------------------------|
| Structure                   | 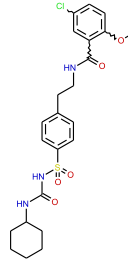 |  |  |
| Actual Endpoint (-log C)    | 4.21661                                                                             | 3.87715                                                                             | 4.16036                                                                             |
| Predicted Endpoint (-log C) | 4.21035                                                                             | 3.6546                                                                              | 4.65915                                                                             |
| Distance                    | 0.636                                                                               | 0.722                                                                               | 0.736                                                                               |
| Reference                   | UPJ-26452                                                                           | NTP REPORT # 225                                                                    | EPA COVER SHEET 0192;891101;(1)                                                     |

## Model Applicability

Unknown features are fingerprint features in the query molecule, but not found or appearing too infrequently in the training set.

1. All properties and OPS components are within expected ranges.
2. Unknown ECFP\_6 feature: -1046436026: [\*]F
3. Unknown ECFP\_6 feature: 99947387: [\*]:c(:[\*])Cl
4. Unknown ECFP\_6 feature: 226796801: [\*]C([\*])([\*])F
5. Unknown ECFP\_6 feature: 1305253718: [\*]:c(:[\*])O[c(:[\*]):[\*]]
6. Unknown ECFP\_6 feature: -677309799: [\*]c(:[\*]):n:[cH]:[\*]
7. Unknown ECFP\_6 feature: 1338334141: [\*]C(=[\*])NC
8. Unknown ECFP\_6 feature: -177077903: [\*]N[c(:[cH]:[\*]):[cH]:[\*]]
9. Unknown ECFP\_6 feature: 1336678434: [\*][c(:[\*]):c(:[cH]:[\*])C([\*])([\*])[\*]
10. Unknown ECFP\_6 feature: -649580166: [\*]NC(=O)N[\*]
11. Unknown ECFP\_6 feature: -1952889961: [\*]:c(:[\*])C(F)(F)F
12. Unknown ECFP\_6 feature: 1413420509: [\*]C(=[\*])[c(:[cH]:[\*]):n:[\*]
13. Unknown ECFP\_6 feature: 1996163143: [\*]:[cH]:[cH]:n:[\*]
14. Unknown ECFP\_6 feature: 1430169877: [\*]NC(=O)[c(:[\*]):[\*]
15. Unknown ECFP\_6 feature: 864287155: [\*]NC

## Feature Contribution

Top features for positive contribution

| Fingerprint                                   | Bit/Smiles | Feature Structure                                                                                                               | Score  |
|-----------------------------------------------|------------|---------------------------------------------------------------------------------------------------------------------------------|--------|
| ECFP_6                                        | -176455838 | 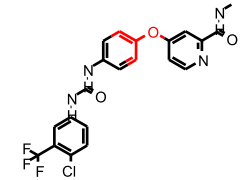<br><chem>[*]O[c](:[cH]:[*]):[cH]:[*]</chem> | 0.106  |
| FCFP_6                                        | 32         | <br><chem>[*]Cl</chem>                       | 0.101  |
| FCFP_6                                        | 3          | <br><chem>[*]N[*]</chem>                     | 0.0924 |
| <b>Top Features for negative contribution</b> |            |                                                                                                                                 |        |
| Fingerprint                                   | Bit/Smiles | Feature Structure                                                                                                               | Score  |
| FCFP_6                                        | 1          | <br><chem>[*]N=[*]</chem>                  | -0.102 |

|               |                   |                                                                                                                                                                         |                |
|---------------|-------------------|-------------------------------------------------------------------------------------------------------------------------------------------------------------------------|----------------|
| <p>ECFP_6</p> | <p>1236483485</p> | 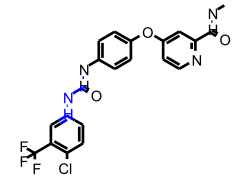 <p><chem>[*]C(=O)N(c1ccc(Oc2cc(O)nc(=O)n2)cc1)c3ccc(Oc4cc(O)nc(=O)n4)cc3</chem></p> | <p>-0.0747</p> |
| <p>FCFP_6</p> | <p>203677720</p>  |  <p><chem>[*]C(=O)[c]([cH]:[*]):[*]</chem></p>                                       | <p>-0.0713</p> |

Q4

TOPKAT\_Rat\_Maximum\_Tolerated\_Dose\_Feed

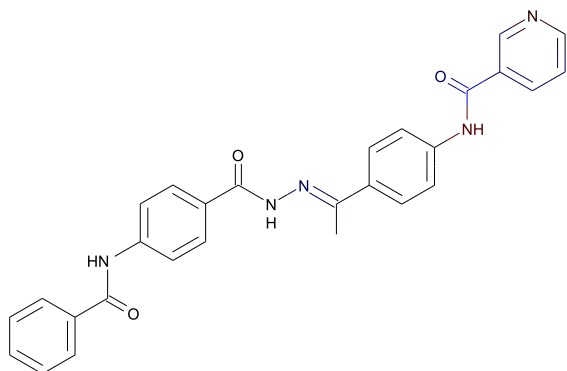C<sub>28</sub>H<sub>23</sub>N<sub>5</sub>O<sub>3</sub>

Molecular Weight: 477.51391

ALogP: 3.082

Rotatable Bonds: 7

Acceptors: 5

Donors: 3

### Model Prediction

Prediction: 0.117

Unit: g/kg\_body\_weight

Mahalanobis Distance: 9.42

Mahalanobis Distance p-value: 0.000352

Mahalanobis Distance: The Mahalanobis distance (MD) is a generalization of the Euclidean distance that accounts for correlations among the X properties. It is calculated as the distance to the center of the training data. The larger the MD, the less trustworthy the prediction.

Mahalanobis Distance p-value: The p-value gives the fraction of training data with an MD greater than or equal to the one for the given sample, assuming normally distributed data. The smaller the p-value, the less trustworthy the prediction. For highly non-normal X properties (e.g., fingerprints), the MD p-value is wildly inaccurate.

### Structural Similar Compounds

| Name                        | SALICYLAZOSULFAPYRIDINE | FUROSEMIDE     | C.I.PIGMENT RED 23 |
|-----------------------------|-------------------------|----------------|--------------------|
| Structure                   |                         |                |                    |
| Actual Endpoint (-log C)    | 3.375                   | 4.04236        | 2.30052            |
| Predicted Endpoint (-log C) | 2.80292                 | 2.8614         | 3.55333            |
| Distance                    | 0.711                   | 0.831          | 0.868              |
| Reference                   | NCI/NTP TR-457          | NCI/NTP TR-356 | NCI/NTP TR-411     |

### Model Applicability

Unknown features are fingerprint features in the query molecule, but not found or appearing too infrequently in the training set.

1. All properties and OPS components are within expected ranges.

### Feature Contribution

#### Top features for positive contribution

| Fingerprint | Bit/Smiles | Feature Structure | Score  |
|-------------|------------|-------------------|--------|
| FCFP_2      | 3          | <br>[*]N[*]       | 0.0737 |



|                                               |                   |                                                                                                                                |              |
|-----------------------------------------------|-------------------|--------------------------------------------------------------------------------------------------------------------------------|--------------|
| FCFP_2                                        | 17                | 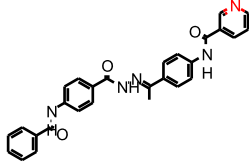<br>[*]:n:[*]                               | 0.0441       |
| FCFP_2                                        | 590925877         | <br>[*]N[c](:[cH]:[*]):[c<br>H]:[*]         | 0.00762      |
| <b>Top Features for negative contribution</b> |                   |                                                                                                                                |              |
| <b>Fingerprint</b>                            | <b>Bit/Smiles</b> | <b>Feature Structure</b>                                                                                                       | <b>Score</b> |
| FCFP_2                                        | 1872154524        | <br>[*]C(=O)[*]                             | -0.105       |
| FCFP_2                                        | 203677720         | <br>[*]C(=[*])[c](:[cH]:[<br>*]):[cH]:[*] | -0.0829      |
| FCFP_2                                        | 1                 | <br>[*]N=[*]                              | -0.0796      |



# Sorafenib

# TOPKAT\_Rat\_Maximum\_Tolerated\_Dose\_Feed

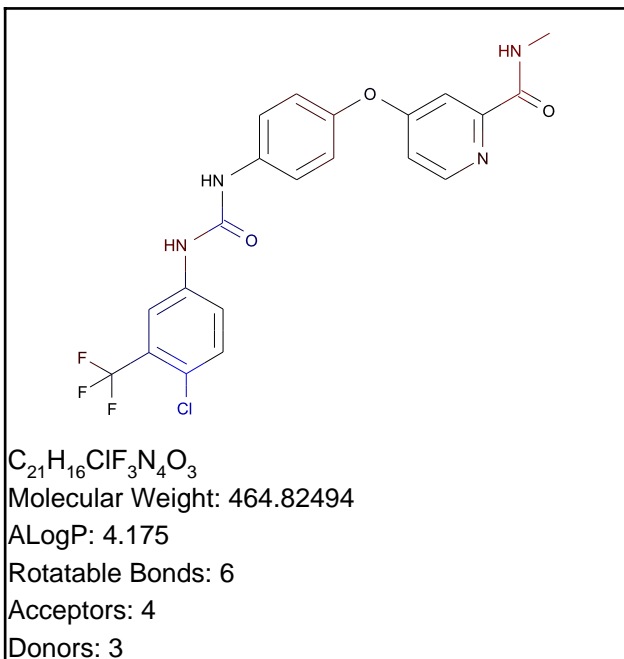

## Model Prediction

Prediction: 0.0885

Unit: g/kg\_body\_weight

Mahalanobis Distance: 12.4

Mahalanobis Distance p-value: 1.76e-009

Mahalanobis Distance: The Mahalanobis distance (MD) is a generalization of the Euclidean distance that accounts for correlations among the X properties. It is calculated as the distance to the center of the training data. The larger the MD, the less trustworthy the prediction.

Mahalanobis Distance p-value: The p-value gives the fraction of training data with an MD greater than or equal to the one for the given sample, assuming normally distributed data. The smaller the p-value, the less trustworthy the prediction. For highly non-normal X properties (e.g., fingerprints), the MD p-value is wildly inaccurate.

## Structural Similar Compounds

| Name                        | FUROSEMIDE                                                                          | PHENOLPHTHALEIN                                                                     | DISPERSE YELLOW 3                                                                   |
|-----------------------------|-------------------------------------------------------------------------------------|-------------------------------------------------------------------------------------|-------------------------------------------------------------------------------------|
| Structure                   | 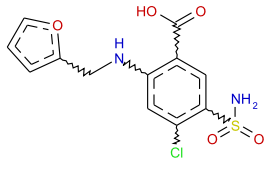 |  |  |
| Actual Endpoint (-log C)    | 4.04236                                                                             | 2.20184                                                                             | 2.77703                                                                             |
| Predicted Endpoint (-log C) | 2.8614                                                                              | 2.8857                                                                              | 2.80195                                                                             |
| Distance                    | 0.741                                                                               | 0.780                                                                               | 0.799                                                                               |
| Reference                   | NCI/NTP TR-356                                                                      | NCI/NTP TR-465                                                                      | NCI/NTP TR-222                                                                      |

## Model Applicability

Unknown features are fingerprint features in the query molecule, but not found or appearing too infrequently in the training set.

- All properties and OPS components are within expected ranges.

## Feature Contribution

### Top features for positive contribution

| Fingerprint | Bit/Smiles | Feature Structure                                                                                                  | Score |
|-------------|------------|--------------------------------------------------------------------------------------------------------------------|-------|
| FCFP_2      | -885550502 | 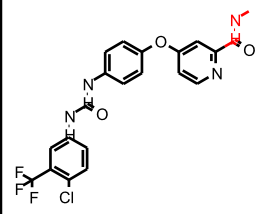<br><chem>[*]C(=[*])NC</chem> | 0.115 |

|                                               |                   |                                                                                                                                         |              |
|-----------------------------------------------|-------------------|-----------------------------------------------------------------------------------------------------------------------------------------|--------------|
| FCFP_2                                        | 3                 | 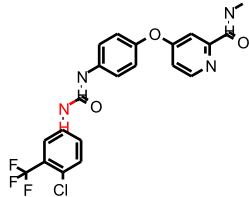<br><chem>[*]N[*]</chem>                             | 0.0737       |
| FCFP_2                                        | 332760439         | <br><chem>[*]O[c](:[cH]:[*]):[cH]:[*]</chem>         | 0.0611       |
| <b>Top Features for negative contribution</b> |                   |                                                                                                                                         |              |
| <b>Fingerprint</b>                            | <b>Bit/Smiles</b> | <b>Feature Structure</b>                                                                                                                | <b>Score</b> |
| FCFP_2                                        | 71476542          | <br><chem>[*]:[c](:[*])Cl</chem>                     | -0.134       |
| FCFP_2                                        | 1872154524        | <br><chem>[*]C(=O)[*]</chem>                       | -0.105       |
| FCFP_2                                        | 203677720         | <br><chem>[*]C(=[*])[c](:[cH]:[*]):[cH]:[*]</chem> | -0.0829      |



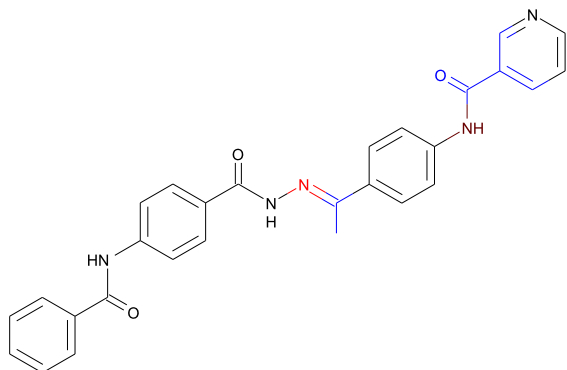
 $C_{28}H_{23}N_5O_3$ 

Molecular Weight: 477.51391

ALogP: 3.082

Rotatable Bonds: 7

Acceptors: 5

Donors: 3

### Model Prediction

Prediction: 0.148

Unit: g/kg\_body\_weight

Mahalanobis Distance: 12.3

Mahalanobis Distance p-value: 3.08e-009

Mahalanobis Distance: The Mahalanobis distance (MD) is a generalization of the Euclidean distance that accounts for correlations among the X properties. It is calculated as the distance to the center of the training data. The larger the MD, the less trustworthy the prediction.

Mahalanobis Distance p-value: The p-value gives the fraction of training data with an MD greater than or equal to the one for the given sample, assuming normally distributed data. The smaller the p-value, the less trustworthy the prediction. For highly non-normal X properties (e.g., fingerprints), the MD p-value is wildly inaccurate.

### Structural Similar Compounds

| Name                        | OCHRATOXIN     | SULFISOOXAZOLE | PENICILLIN VK  |
|-----------------------------|----------------|----------------|----------------|
| Structure                   |                |                |                |
| Actual Endpoint (-log C)    | 6.28396        | 2.82494        | 2.54455        |
| Predicted Endpoint (-log C) | 5.12358        | 3.0705         | 3.9702         |
| Distance                    | 0.921          | 1.081          | 1.282          |
| Reference                   | NCI/NTP TR-358 | NCI/NTP TR-138 | NCI/NTP TR-336 |

### Model Applicability

Unknown features are fingerprint features in the query molecule, but not found or appearing too infrequently in the training set.

1. Molecular\_Weight out of range. Value: 477.51. Training min, max, mean, SD: 68.074, 434.63, 171.13, 85.06.
2. Num\_AromaticRings out of range. Value: 4. Training min, max, mean, SD: 0, 2, 0.5625, 0.693.
3. OPS\_PC6 out of range. Value: -2.6475. Training min, max, SD, explained variance: -2.4321, 2.9885, 1.256, 0.0488.
4. Unknown FCFP\_2 feature: -1549192822: [\*]\N=C(/C)\[c](:[\*]):[\*]
5. Unknown FCFP\_2 feature: 581019816: [\*]NN=C([\*])[\*]
6. Unknown FCFP\_2 feature: -885520711: [\*]C(=[\*])NN=[\*]

### Feature Contribution

#### Top features for positive contribution

| Fingerprint | Bit/Smiles | Feature Structure | Score |
|-------------|------------|-------------------|-------|
|             |            |                   |       |

|                                               |                   |                                                                                                                                |              |
|-----------------------------------------------|-------------------|--------------------------------------------------------------------------------------------------------------------------------|--------------|
| FCFP_2                                        | 1                 | 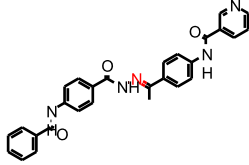<br>[*]N=[*]                                | 0.511        |
| FCFP_2                                        | 3                 | <br>[*]N[*]                                 | 0.104        |
| <b>Top Features for negative contribution</b> |                   |                                                                                                                                |              |
| <b>Fingerprint</b>                            | <b>Bit/Smiles</b> | <b>Feature Structure</b>                                                                                                       | <b>Score</b> |
| FCFP_2                                        | 136597326         | <br>[*]C(=[*])C                             | -0.489       |
| FCFP_2                                        | 203677720         | <br>[*]C(=[*])[c](:[cH]:[<br>*]):[cH]:[*] | -0.406       |
| FCFP_2                                        | 1872154524        | <br>[*]C(=O)[*]                           | -0.307       |





# Sorafenib

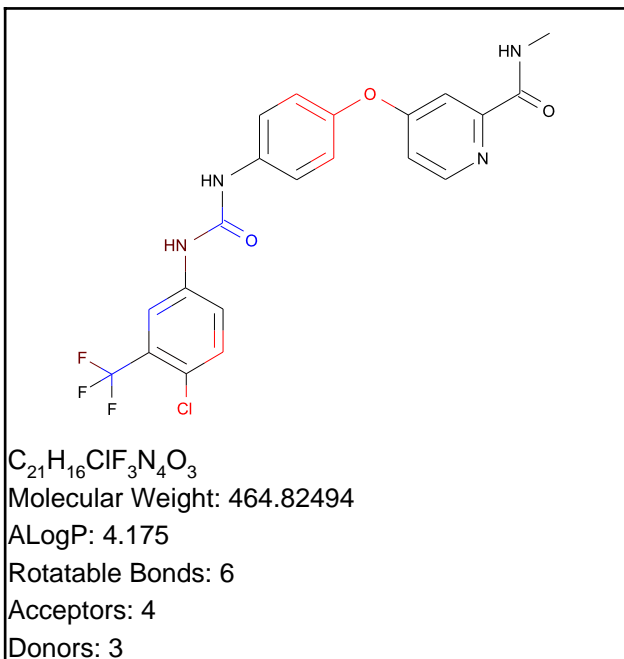

## Model Prediction

Prediction: 0.000918

Unit: g/kg\_body\_weight

Mahalanobis Distance: 12.2

Mahalanobis Distance p-value: 4.69e-009

Mahalanobis Distance: The Mahalanobis distance (MD) is a generalization of the Euclidean distance that accounts for correlations among the X properties. It is calculated as the distance to the center of the training data. The larger the MD, the less trustworthy the prediction.

Mahalanobis Distance p-value: The p-value gives the fraction of training data with an MD greater than or equal to the one for the given sample, assuming normally distributed data. The smaller the p-value, the less trustworthy the prediction. For highly non-normal X properties (e.g., fingerprints), the MD p-value is wildly inaccurate.

# TOPKAT\_Rat\_Maximum\_Tolerated\_Dose\_Gavage

## Structural Similar Compounds

| Name                        | OCHRATOXIN                                                                          | SULFISOOXAZOLE                                                                      | PENICILLIN VK                                                                       |
|-----------------------------|-------------------------------------------------------------------------------------|-------------------------------------------------------------------------------------|-------------------------------------------------------------------------------------|
| Structure                   | 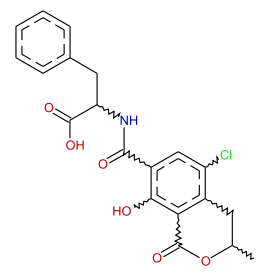 |  |  |
| Actual Endpoint (-log C)    | 6.28396                                                                             | 2.82494                                                                             | 2.54455                                                                             |
| Predicted Endpoint (-log C) | 5.12358                                                                             | 3.0705                                                                              | 3.9702                                                                              |
| Distance                    | 0.758                                                                               | 0.997                                                                               | 1.159                                                                               |
| Reference                   | NCI/NTP TR-358                                                                      | NCI/NTP TR-138                                                                      | NCI/NTP TR-336                                                                      |

## Model Applicability

Unknown features are fingerprint features in the query molecule, but not found or appearing too infrequently in the training set.

1. Molecular\_Weight out of range. Value: 464.82. Training min, max, mean, SD: 68.074, 434.63, 171.13, 85.06.
2. Num\_AromaticRings out of range. Value: 3. Training min, max, mean, SD: 0, 2, 0.5625, 0.693.
3. OPS\_PC5 out of range. Value: -3.5737. Training min, max, SD, explained variance: -3.4, 4.1587, 1.489, 0.0686.
4. OPS\_PC7 out of range. Value: -3.8342. Training min, max, SD, explained variance: -2.8003, 2.9332, 1.16, 0.0416.
5. Unknown FCFP\_2 feature: 1499521844: [\*]NC(=O)N[\*]
6. Unknown FCFP\_2 feature: -1029533685: [\*]:[c](:[\*])C(F)(F)F
7. Unknown FCFP\_2 feature: 136686699: [\*]NC

## Feature Contribution

### Top features for positive contribution

| Fingerprint | Bit/Smiles | Feature Structure | Score |
|-------------|------------|-------------------|-------|
|             |            |                   |       |

|                                               |                   |                                                                                                                                         |              |
|-----------------------------------------------|-------------------|-----------------------------------------------------------------------------------------------------------------------------------------|--------------|
| FCFP_2                                        | 332760439         | 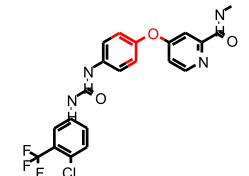<br><chem>[*]O[c](:[cH]:[*]);[cH]:[*]</chem>         | 0.672        |
| FCFP_2                                        | 32                | <br><chem>[*]Cl</chem>                               | 0.526        |
| FCFP_2                                        | 1                 | <br><chem>[*]N=[*]</chem>                            | 0.511        |
| <b>Top Features for negative contribution</b> |                   |                                                                                                                                         |              |
| <b>Fingerprint</b>                            | <b>Bit/Smiles</b> | <b>Feature Structure</b>                                                                                                                | <b>Score</b> |
| FCFP_2                                        | 203677720         | <br><chem>[*]C(=[*])[c](:[cH]:[*]);[cH]:[*]</chem> | -0.406       |
| FCFP_2                                        | 1872154524        | <br><chem>[*]C(=O)[*]</chem>                       | -0.307       |

|        |   |                                                                                                                   |       |
|--------|---|-------------------------------------------------------------------------------------------------------------------|-------|
| FCFP_2 | 0 | 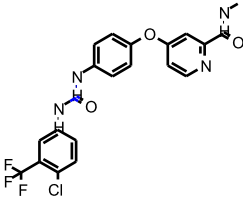<br><chem>[*]C(=[*])[*]</chem> | -0.29 |
|--------|---|-------------------------------------------------------------------------------------------------------------------|-------|

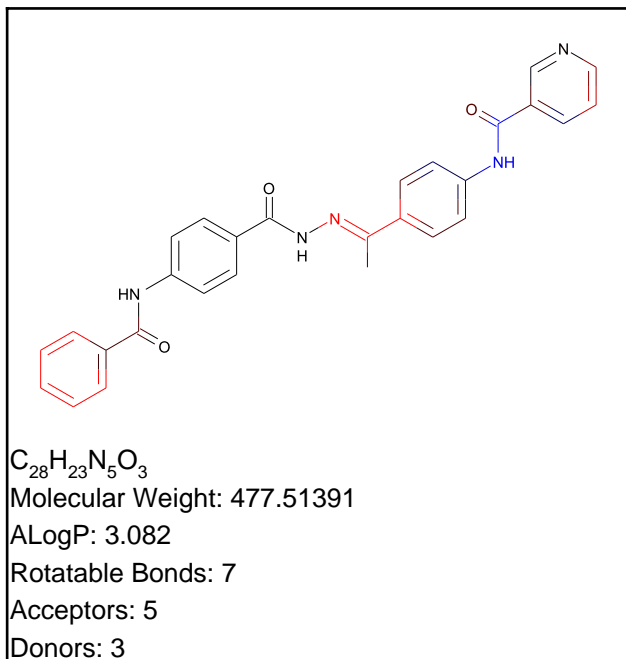

### Model Prediction

Prediction: 2.81

Unit: g/kg\_body\_weight

Mahalanobis Distance: 22.1

Mahalanobis Distance p-value: 1.54e-016

Mahalanobis Distance: The Mahalanobis distance (MD) is a generalization of the Euclidean distance that accounts for correlations among the X properties. It is calculated as the distance to the center of the training data. The larger the MD, the less trustworthy the prediction.

Mahalanobis Distance p-value: The p-value gives the fraction of training data with an MD greater than or equal to the one for the given sample, assuming normally distributed data. The smaller the p-value, the less trustworthy the prediction. For highly non-normal X properties (e.g., fingerprints), the MD p-value is wildly inaccurate.

### Structural Similar Compounds

| Name                        | BENZENESULFONIC ACID; 2,2'-(4;4'-BIPHENYLYLENE)DI-; DISODIUM SALT (Na STRIPPED)     | bis-OXATIN ACETATE                                                                  | CARBAMIC ACID; N-(5-BENZOYL-BENZIMIDAZOL-2-YL)-; METHYL ESTER                       |
|-----------------------------|-------------------------------------------------------------------------------------|-------------------------------------------------------------------------------------|-------------------------------------------------------------------------------------|
| Structure                   | 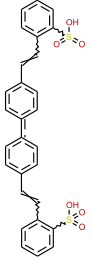 |  |  |
| Actual Endpoint (-log C)    | 1.968                                                                               | 1.717                                                                               | 2.617                                                                               |
| Predicted Endpoint (-log C) | 1.72109                                                                             | 2.40947                                                                             | 2.2368                                                                              |
| Distance                    | 0.834                                                                               | 0.851                                                                               | 0.861                                                                               |
| Reference                   | MVCRB3 2;193;73                                                                     | NIIRDN 6;609;82                                                                     | IYKEDH 19;735;88                                                                    |

### Model Applicability

Unknown features are fingerprint features in the query molecule, but not found or appearing too infrequently in the training set.

1. All properties and OPS components are within expected ranges.
2. Unknown ECFP\_2 feature: 128986386: [\*]N=C(/C)\[c](:[\*]):[\*]
3. Unknown FCFP\_6 feature: 16: [\*]:[cH]:[\*]
4. Unknown FCFP\_6 feature: 1618154665: [\*]:[cH]:[cH]:[cH]:[\*]
5. Unknown FCFP\_6 feature: 1747237384: [\*]:[cH]:n:[cH]:[\*]
6. Unknown FCFP\_6 feature: 581019816: [\*]NN=C(\*)[\*]
7. Unknown FCFP\_6 feature: -885520711: [\*]C(=[\*])NN=[\*]

### Feature Contribution

#### Top features for positive contribution

| Fingerprint | Bit/Smiles | Feature Structure | Score |
|-------------|------------|-------------------|-------|
|             |            |                   |       |

| ECFP_6                                 | 642810091   | 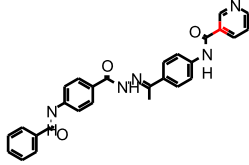<br>[*][c](:[*]):[*]                     | 0.281  |
|----------------------------------------|-------------|-----------------------------------------------------------------------------------------------------------------------------|--------|
| ECFP_6                                 | -1897341097 | <br>[*]N[*]                              | 0.216  |
| ECFP_6                                 | 1571214559  | <br>[*]1:[cH]:[cH]:[cH]:[cH]:[cH]:[cH]:1 | 0.19   |
| Top Features for negative contribution |             |                                                                                                                             |        |
| Fingerprint                            | Bit/Smiles  | Feature Structure                                                                                                           | Score  |
| ECFP_6                                 | 655739385   | <br>[*]:n:[*]                          | -0.239 |
| ECFP_6                                 | 734603939   | <br>[*]C                               | -0.201 |

|        |            |                                                                                                                                             |       |
|--------|------------|---------------------------------------------------------------------------------------------------------------------------------------------|-------|
| FCFP_6 | 1549103449 | 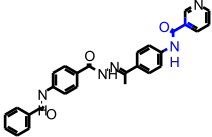<br><chem>[*]NC(=O)c1ccc(cc1)Nc2ccc(cc2)Nc3ccncc3</chem> | 0.117 |
|--------|------------|---------------------------------------------------------------------------------------------------------------------------------------------|-------|

# Sorafenib

TOPKAT\_Rat\_Oral\_LD50

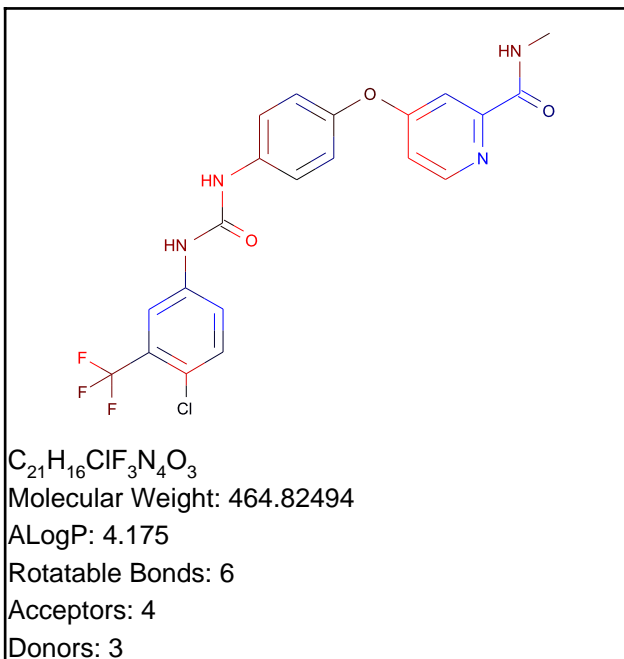

## Model Prediction

Prediction: 0.823

Unit: g/kg\_body\_weight

Mahalanobis Distance: 21

Mahalanobis Distance p-value: 1.93e-012

Mahalanobis Distance: The Mahalanobis distance (MD) is a generalization of the Euclidean distance that accounts for correlations among the X properties. It is calculated as the distance to the center of the training data. The larger the MD, the less trustworthy the prediction.

Mahalanobis Distance p-value: The p-value gives the fraction of training data with an MD greater than or equal to the one for the given sample, assuming normally distributed data. The smaller the p-value, the less trustworthy the prediction. For highly non-normal X properties (e.g., fingerprints), the MD p-value is wildly inaccurate.

## Structural Similar Compounds

| Name                        | FLUBENDAZOLE                                                                        | PHOSPHORAMIDOTHIOIC ACID; ACETIMIDOYL-; O; O-bis-(p-CHLOROPHENYL)ESTER              | BEZAFIBRATE                                                                         |
|-----------------------------|-------------------------------------------------------------------------------------|-------------------------------------------------------------------------------------|-------------------------------------------------------------------------------------|
| Structure                   | 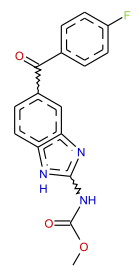 |  |  |
| Actual Endpoint (-log C)    | 2.088                                                                               | 5.006                                                                               | 1.946                                                                               |
| Predicted Endpoint (-log C) | 2.69288                                                                             | 3.23989                                                                             | 2.54395                                                                             |
| Distance                    | 0.697                                                                               | 0.703                                                                               | 0.721                                                                               |
| Reference                   | YRTMA6 9;11;78                                                                      | FMCHA2 -;C149;89                                                                    | ARZNAD 30;2023;80                                                                   |

## Model Applicability

Unknown features are fingerprint features in the query molecule, but not found or appearing too infrequently in the training set.

1. All properties and OPS components are within expected ranges.
2. Unknown FCFP\_6 feature: 16: [\*]:[cH]:[\*]
3. Unknown FCFP\_6 feature: 71476542: [\*]:[c](:[\*])Cl
4. Unknown FCFP\_6 feature: 1747237384: [\*]:[cH]:n:[cH]:[\*]
5. Unknown FCFP\_6 feature: 1618154665: [\*]:[cH]:[cH]:[cH]:[\*]
6. Unknown FCFP\_6 feature: 136686699: [\*]NC

## Feature Contribution

### Top features for positive contribution

| Fingerprint | Bit/Smiles | Feature Structure | Score |
|-------------|------------|-------------------|-------|
|             |            |                   |       |

| FCFP_6                                 | 71953198    | 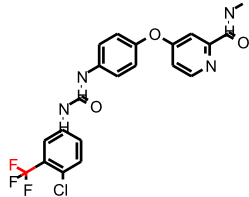<br>[*]C[*](*)F    | 0.392  |
|----------------------------------------|-------------|-------------------------------------------------------------------------------------------------------|--------|
| ECFP_6                                 | -1046436026 | <br>[*]F           | 0.349  |
| ECFP_6                                 | 642810091   | <br>[*]c(:[*]):[*] | 0.281  |
| Top Features for negative contribution |             |                                                                                                       |        |
| Fingerprint                            | Bit/Smiles  | Feature Structure                                                                                     | Score  |
| ECFP_6                                 | 226796801   | <br>[*]C[*](*)F   | -0.32  |
| ECFP_6                                 | -817402818  | <br>[*]Cl        | -0.263 |



|        |            |                                                                                                                                                                                  |        |
|--------|------------|----------------------------------------------------------------------------------------------------------------------------------------------------------------------------------|--------|
| ECFP_6 | -176455838 | 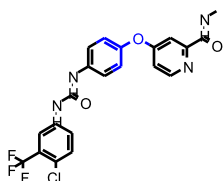<br><chem>O=C1N=CN=C1c2ccc(Oc3ccc(N4C=NC=C4)cc3)cc2</chem><br>[*]O[c](:[cH]:[*]):[c<br>H]:[*] | -0.257 |
|--------|------------|----------------------------------------------------------------------------------------------------------------------------------------------------------------------------------|--------|
